# Supplementary material for: Effectiveness of pre-anaesthetic assessment clinic: a systematic review of randomised and non-randomised prospective controlled studies
Source: PubMed Central journal article supplement — BMJ Open. 2022 May 11;12(5):e054206. doi: 10.1136/bmjopen-2021-054206 (PMC9096538; doi:10.1136/bmjopen-2021-054206), 2022-05-11
Supplement: bmjopen-2021-054206.draft_revisions.pdf [file bmjopen-2021-054206.draft_revisions.pdf]

# BMJ Open

BMJ Open is committed to open peer review. As part of this commitment we make the peer review history of every article we publish publicly available.

When an article is published we post the peer reviewers' comments and the authors' responses online. We also post the versions of the paper that were used during peer review. These are the versions that the peer review comments apply to.

The versions of the paper that follow are the versions that were submitted during the peer review process. They are not the versions of record or the final published versions. They should not be cited or distributed as the published version of this manuscript.

BMJ Open is an open access journal and the full, final, typeset and author-corrected version of record of the manuscript is available on our site with no access controls, subscription charges or pay-per-view fees (<http://bmjopen.bmj.com>).

If you have any questions on BMJ Open's open peer review process please email [info.bmjopen@bmj.com](mailto:info.bmjopen@bmj.com)

# BMJ Open

## The effect of pre-anaesthetic assessment clinic: a systematic review of randomised and non-randomised prospective controlled studies

|                               |                                                                                                                                                                                                                                                                                                                                                            |
|-------------------------------|------------------------------------------------------------------------------------------------------------------------------------------------------------------------------------------------------------------------------------------------------------------------------------------------------------------------------------------------------------|
| Journal:                      | <i>BMJ Open</i>                                                                                                                                                                                                                                                                                                                                            |
| Manuscript ID                 | bmjopen-2021-054206                                                                                                                                                                                                                                                                                                                                        |
| Article Type:                 | Original research                                                                                                                                                                                                                                                                                                                                          |
| Date Submitted by the Author: | 04-Jun-2021                                                                                                                                                                                                                                                                                                                                                |
| Complete List of Authors:     | Kristoffersen, Eirunn Wallevik; University of Agder, Department of Health and Nursing Science<br>Opsal, Anne; University of Agder, Department of Health and Nursing Science<br>Tveit, Tor; University of Agder, Department of Health and Nursing Science<br>Berg , Rigmor C ; Norwegian Institute of Public Health<br>Fossum, Mariann; University of Agder |
| Keywords:                     | Adult anaesthesia < ANAESTHETICS, Health & safety < HEALTH SERVICES ADMINISTRATION & MANAGEMENT, Quality in health care < HEALTH SERVICES ADMINISTRATION & MANAGEMENT, Adult surgery < SURGERY                                                                                                                                                             |
|                               |                                                                                                                                                                                                                                                                                                                                                            |

SCHOLARONE™  
Manuscripts

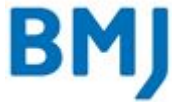

I, the Submitting Author has the right to grant and does grant on behalf of all authors of the Work (as defined in the below author licence), an exclusive licence and/or a non-exclusive licence for contributions from authors who are: i) UK Crown employees; ii) where BMJ has agreed a CC-BY licence shall apply, and/or iii) in accordance with the terms applicable for US Federal Government officers or employees acting as part of their official duties; on a worldwide, perpetual, irrevocable, royalty-free basis to BMJ Publishing Group Ltd ("BMJ") its licensees and where the relevant Journal is co-owned by BMJ to the co-owners of the Journal, to publish the Work in this journal and any other BMJ products and to exploit all rights, as set out in our [licence](#).

The Submitting Author accepts and understands that any supply made under these terms is made by BMJ to the Submitting Author unless you are acting as an employee on behalf of your employer or a postgraduate student of an affiliated institution which is paying any applicable article publishing charge ("APC") for Open Access articles. Where the Submitting Author wishes to make the Work available on an Open Access basis (and intends to pay the relevant APC), the terms of reuse of such Open Access shall be governed by a Creative Commons licence – details of these licences and which [Creative Commons](#) licence will apply to this Work are set out in our licence referred to above.

Other than as permitted in any relevant BMJ Author's Self Archiving Policies, I confirm this Work has not been accepted for publication elsewhere, is not being considered for publication elsewhere and does not duplicate material already published. I confirm all authors consent to publication of this Work and authorise the granting of this licence.

1  
2  
3 1 **The effect of pre-anaesthetic assessment clinic: a systematic review of randomised and**  
4  
5 2 **non-randomised prospective controlled studies**  
6  
7  
8 3

9  
10 4 Eirunn Wallevik Kristoffersen<sup>1, \*</sup>, Anne Opsal<sup>1</sup>, Tor Tveit<sup>1,2,3</sup>, Rigmor C Berg<sup>4,5</sup>, Mariann

11  
12  
13 5 Fossum<sup>1</sup>  
14

15 6  
16  
17 7 <sup>1</sup>Department of Health and Nursing Science, University of Agder, Grimstad/Kristiansand,  
18  
19  
20 8 Norway

21  
22 9 <sup>2</sup>Department of Anaesthesiology and Intensive Care, Soerlandet Hospital, Kristiansand,  
23  
24  
25 10 Norway

26  
27 11 <sup>3</sup>Department of Technology and e-Health, Soerlandet Hospital, Kristiansand, Norway

28  
29  
30 12 <sup>4</sup> Department of Community Medicine, University of Tromsø, Tromsø, Norway

31  
32 13 <sup>5</sup>Norwegian Institute of Public Health, Oslo, Norway  
33  
34

35 14

36  
37 15 \*Corresponding author:

38  
39 16 Eirunn Wallevik Kristoffersen

40  
41  
42 17 Department of Health and Nursing Science, University of Agder, Grimstad/Kristiansand,  
43  
44  
45 18 Norway

46  
47 19 E-mail: eirunn.w.kristoffersen@uia.no  
48  
49

50 20

51  
52 21 Word count: 3996  
53

54 22

55  
56  
57 23  
58  
59  
60

1  
2  
3 24 **ABSTRACT**

4  
5 25 **Objectives:** The aim of this systematic review was to examine the effectiveness of pre-  
6  
7 26 anaesthetic assessment clinics (PACs) implemented to improve quality and patient safety in  
8  
9 27 perioperative care.

10  
11 28 **Design:** Systematic review.

12  
13 29 **Data sources:** The electronic databases CINAHL Plus with Full Text (EBSCOhost), Medline,  
14  
15 30 and Embase (OvidSP) were systematically searched from 1st April, 1996 to 4th February,  
16  
17 31 2021.

18  
19 32 **Eligibility criteria:** The main inclusion criterion was that the study, using empirical  
20  
21 33 quantitative methods, addressed the effectiveness of PACs.

22  
23 34 **Data extraction and synthesis:** Titles, abstracts, and full texts were screened in duplicate by  
24  
25 35 two authors. Risk of bias assessment, using the Joanna Briggs Institute critical appraisal  
26  
27 36 checklist for quasi-experimental studies, and data extraction were performed by one author  
28  
29 37 and checked by the other author. Results were synthesised narratively owing to the  
30  
31 38 heterogeneity of the included studies.

32  
33 39 **Results:** Seven prospective controlled studies were conducted. Most studies had a high risk  
34  
35 40 of bias. Three studies reported a significant reduction in the length of the hospital stay, and  
36  
37 41 two studies reported a significant reduction in cancellation of surgery for medical reasons  
38  
39 42 when patients were seen in the PAC. In addition, the included studies presented mixed  
40  
41 43 results regarding anxiety in patients.

42  
43 44 **Conclusion:** This systematic review demonstrated a reduction in the length of hospital stay  
44  
45 45 and cancellation of surgery when the patients had been assessed in the PAC. There is a need  
46  
47 46 for high-quality prospective studies to gain a deeper understanding of the effectiveness of  
48  
49 47 PACs.

48  
49 48 **PROSPERO registration number:** CRD42019137724

50  
51 50 **Keywords:** pre-anaesthetic assessment clinic, preoperative care, quality, safety, systematic  
52  
53 51 review

54 52  
55 53  
56 54  
57 55  
58 56  
59 57  
60 57

## ARTICLE SUMMARY

### Strengths and Limitations of this study

- Only prospective studies were included in this systematic review.
- The systematic review was conducted in accordance with international guidelines.
- Only seven studies were identified, highlighting the need for further research on pre-anaesthetic assessment clinics.
- Overall, the quality of the included studies was low, and the current practice possesses limited evidence base.

## INTRODUCTION

Anaesthesia constitutes an important part of surgery; however, it has the potential to activate physiological changes that can increase morbidity and mortality,[1] mainly depending on the patients' preoperative health condition and age.[2] Hospitals are treating patients with complex, comorbid healthcare problems who undergo progressively extensive surgeries and interventions.[3,4] To ensure the quality and safety of anaesthesia and surgery, precise knowledge of the clinical characteristics of patients undergoing surgery is critical to the perioperative treatment plan.[2] Over the past 50 years, perioperative mortality, including anaesthesia-related mortality, has declined, with the most significant decline observed in developed countries,[1,5] mainly due to new anaesthetics, improved monitoring equipment and training, availability of recovery rooms, and improved airway management.[4] However, an Australian study reported that 14% of anaesthetic-surgical complications and 39% of deaths attributed to anaesthesia were associated with insufficient and/or inadequate preoperative evaluation.[6] A Danish retrospective investigation showed that the deaths among patients undergoing surgery could have been prevented by a thorough preoperative evaluation,[7] indicating that risk factors are both patient-and

1  
2  
3 85 surgery-related and linked to organisational structures.[8] Future efforts should improve  
4  
5 86 preoperative anaesthesia safety,[9] by improving planning and preparation for elective  
6  
7  
8 87 procedures and interventions.  
9

10  
11 88 In 1949, Lee discussed the value of the “anaesthetic outpatient clinic” in the preparation of  
12  
13  
14 89 patients for surgery.[10] Today, an increasing number of pre-anaesthesia assessment clinics  
15  
16 90 (PACs) are supporting hospitals in handling the rise in the number and complexity of surgical  
17  
18  
19 91 procedures.[11] The PAC consultation, conducted by the anaesthesiologist, anaesthesia  
20  
21 92 nurse, or both, is globally recognised as an evaluation method while optimising the patients’  
22  
23  
24 93 medical condition prior to surgery and anaesthesia, and is considered essential in securing  
25  
26 94 anaesthetic practice since it detects anaesthesia-related risk factors and high-risk patients,  
27  
28  
29 95 improves patient outcomes, prepares the patient physically and psychologically for  
30  
31 96 anaesthesia, and ensures the patient’s most favourable condition for surgery and  
32  
33  
34 97 anaesthesia.[12-14] Considering the well-prepared patients and staff, several researchers  
35  
36 98 posit that with PAC, the number of surgical cancellations, length of hospital stay, and  
37  
38  
39 99 mortality rate are reduced, and tests are minimised.[8,15,16] Others assert that patients feel  
40  
41 100 less anxious regarding the subsequent anaesthetic and surgical processes and are highly  
42  
43  
44 101 satisfied with this service when PACs are used.[15,17,18]  
45

46  
47 102 As Turunen *et al.* state, research on PACs is scarce regarding costs, financial savings, the  
48  
49 103 impact on patient safety and quality of care, accuracy of operative patients, and effect on  
50  
51  
52 104 preoperative nursing levels.[19] Survey results indicate that anaesthesiologists perceive day  
53  
54 105 of surgery delays due to missing information as common, even with PAC consultations.[20]  
55  
56  
57 106 The present systematic review examines the outcomes of PAC as systematic work on quality  
58  
59  
60

1  
2  
3 107 and patient safety, including identifying the areas for improvement, implementing  
4  
5 108 interventions, and ensuring that patient outcome improvement.  
6  
7  
8

## 9 109 **METHODS**

10  
11 110 The aim of this systematic review was to examine the effectiveness of PACs in improving  
12  
13 111 quality and patient safety in preoperative care. A further aim was to determine the gaps in  
14  
15 112 existing knowledge for future research. Our systematic review followed the guidelines in the  
16  
17 113 Cochrane Handbook for Systematic Reviews of Interventions [21] and was reported in  
18  
19 114 accordance with the Preferred Reporting Items for Systematic Reviews and Meta-Analyses  
20  
21 115 (PRISMA) guidelines.[22] The protocol was published in PROSPERO: CRD42019137724.[23]  
22  
23  
24 116 We had two review questions:  
25  
26  
27  
28  
29

- 30 117 1. What are the effects of PACs on patient satisfaction, anxiety, and safety?
- 31  
32 118 2. What are the effects of PACs on cancellation rate, cost, and efficiency?  
33  
34  
35

## 36 119 **Search strategies**

37  
38 120 We performed a scoping search in different databases to identify the key terms for the  
39  
40 121 literature search.[24,25] The final search was planned and conducted in close collaboration  
41  
42 122 with a university librarian. On 11th September, 2018 we searched CINAHL Plus with Full Text  
43  
44 123 (EBSCOhost), Medline, and Embase (OvidSP), and updated it on 4th February, 2021.  
45  
46 124 Considering the lack of subject headings (e.g., MeSH) for PAC, we used text words such as  
47  
48 125 preanaesthesia. The search in Medline is presented in Appendix 1. The search mode in  
49  
50 126 CINAHL was Boolean/Phase, which supports Boolean searching or exact phrase searching. To  
51  
52 127 ensure comprehensiveness, we used both the truncation and proximity operators. We  
53  
54 128 limited the search to 1996 since this was the year one of the first known articles in this area  
55  
56  
57  
58  
59  
60



1  
2  
3 129 was published.[23] Complementary methods to identify studies included following up on  
4  
5 130 citations via Scopus, scanning the reference lists of relevant papers and included articles,  
6  
7  
8 131 and checking for relevant studies in clinical trials.[24]  
9

### 10 132 **Eligibility criteria**

11  
12  
13 133 Considering the aim of the review, the main inclusion criterion was that the study, using  
14  
15 134 empirical quantitative methods, addressed the effectiveness of PACs. Specific study  
16  
17  
18 135 eligibility criteria were: (a) published in English or Scandinavian language, (b) scientific  
19  
20 136 publication of original research, (c) reporting the outcomes of PAC, (d) PAC consultation with  
21  
22  
23 137 the patient present, (e) randomised or non-randomised prospective controlled studies, and  
24  
25 138 (f) newly established PAC. We excluded: (a) editorials, discussion papers, and conference  
26  
27  
28 139 abstracts, (b) reviews, (c) instrument testing, (d) studies with children, and (e) retrospective  
29  
30 140 studies.  
31

### 32 141 **Study selection**

33  
34  
35 142 All references identified in the search were transferred to EndNoteX9, where the duplicates  
36  
37  
38 143 were removed. Next, all unique references were transferred to the Covidence screening  
39  
40 144 tool.[26] Study eligibility was ascertained independently by two authors, first at the title and  
41  
42 145 abstract level, and subsequently at the full text. Inclusion was determined by consensus, and  
43  
44  
45 146 disagreements were resolved by consulting a third author.  
46

### 47 147 **Quality assessment**

48  
49  
50 148 We used design-specific checklists to assess the studies' risk of bias. Given the  
51  
52 149 methodological similarity of the included studies, only the Joanna Briggs Institute Critical  
53  
54 150 appraisal checklist for quasi-experimental studies was used.[27] One author performed the  
55  
56  
57 151 risk of bias assessment, and the other checked the accuracy of the assessment.  
58  
59  
60

1  
2  
3 152 Disagreements were resolved through discussion with a third author. Each of the nine  
4  
5 153 checklist questions was answered no, yes, unclear (or not applicable).  
6  
7

#### 8 154 **Data extraction and analysis**

9

10 155 One author extracted data from each included study onto a pre-designed Excel spreadsheet,  
11  
12 156 and another checked the extracted data for accuracy, consistency, and completeness.

13  
14  
15 157 Extracted information included publication details, study design, setting, and characteristics  
16  
17 158 of the patients, interventions, comparisons, and outcome (PICO). We requested information  
18  
19 159 on the missing data; however, received no response from the author. If the PICO elements  
20  
21 160 were sufficiently similar and statistical data were available, we had planned to conduct  
22  
23 161 meta-analyses. However, the extracted data revealed substantial heterogeneity among the  
24  
25 162 studies, and there were no randomised controlled trials (RCTs). Therefore, we performed a  
26  
27 163 narrative synthesis, describing and comparing the main findings from the included studies,  
28  
29 164 and discussing their methodological strengths and weaknesses.  
30  
31  
32  
33

#### 34 165 **RESULTS**

35  
36  
37 166 Figure 1. provides details of the study selection process. A total of 2250 records were  
38  
39 167 identified in the first search and 742 in the second search. After removing duplicates, we  
40  
41 168 screened 2372 records based on the title and abstract; of these, 179 records passed the full-  
42  
43 169 text screening. We included seven studies that met the inclusion criteria.  
44  
45  
46

#### 47 170 **Overall characteristics of the studies**

48

49 171 The seven included studies are listed in Table 1. They were all in English and published in  
50  
51 172 2000–2017, with data collected in the years 1997–2015 (one did not provide this data  
52  
53 173 collection information).[28] Based on our inclusion criteria, all were prospective controlled  
54  
55 174 studies, but we found no RCTs. There was one controlled before-after study.[34] The other  
56  
57 175 six studies had control groups but no baseline assessments, only assessments following PAC  
58  
59  
60

1  
2  
3 176 implementation. There were three 2-group non-parallel after-only studies,[29,30,32] and  
4  
5  
6 177 three 2-group parallel after-only studies [28], where one had a matched control group[31]  
7  
8 178 and one had three follow-up assessments of one arm.[33] In total, the studies included  
9  
10 179 77411 patients.  
11  
12  
13  
14  
15  
16  
17  
18  
19  
20  
21  
22  
23  
24  
25  
26  
27  
28  
29  
30  
31  
32  
33  
34  
35  
36  
37  
38  
39  
40  
41  
42  
43  
44  
45  
46  
47  
48  
49  
50  
51  
52  
53  
54  
55  
56  
57  
58  
59  
60

For peer review only

180 **Table 1: Description of included studies**

| Author, Year, Country                | Study design                         | Sampling time                                   | Population                                                                 | Intervention                                                            | Comparison                                    | Outcomes                                                                                                                                 |
|--------------------------------------|--------------------------------------|-------------------------------------------------|----------------------------------------------------------------------------|-------------------------------------------------------------------------|-----------------------------------------------|------------------------------------------------------------------------------------------------------------------------------------------|
| Farasatkish, 2009[1]<br>Iran         | 2-group<br>after study               | May 2007<br>through<br>August 2007              | N=1716, open-<br>heart surgery,<br>ASA class III-IV                        | Pre-anaesthesia<br>consultation clinic (3-10<br>days before surgery)    | Usual care (within<br>24 h of surgery)        | Cancellations                                                                                                                            |
| Kamal, 2011[2]<br>England            | 2-group<br>after study               | April 2005<br>through<br>April 2009             | N=1445,<br>complex elective<br>orthopaedic<br>surgery, ASA<br>class III-IV | Preoperative<br>anaesthetic assessment<br>clinic (timing not<br>stated) | Usual care (day of<br>surgery)                | Admissions, length<br>of stay, mortality,<br>cost                                                                                        |
| Kamau, 2017[3]<br>Kenya              | CBA                                  | August 2000,<br>April 2001,<br>November<br>2001 | N=51, elective<br>non-cardiac<br>surgery, ASA<br>class III                 | Pre-anaesthesia clinic<br>consultation ( $\geq 48$ h<br>before surgery) | Usual care (day<br>before surgery)            | Anxiety (STAI score)                                                                                                                     |
| Klopfenstein, 2000[4]<br>Switzerland | 2-group<br>after study<br>(parallel) | No data                                         | N=40, elective<br>endoscopic<br>urological<br>surgery, ASA<br>class I-III  | Pre-anaesthetic<br>consultation (1-2 weeks<br>before surgery)           | Usual care (the<br>evening before<br>surgery) | Anxiety (MAACL,<br>VAS)                                                                                                                  |
| Lee, 2012[5]<br>China                | 2-group<br>after study<br>(parallel) | March 2007<br>through<br>November<br>2009       | N=352, elective<br>surgery, ASA<br>class I-IV                              | Anaesthesia<br>consultation clinic ( $\leq 3$<br>months before surgery) | Usual care (the<br>evening before<br>surgery) | Quality of recovery<br>score), cost,<br>cancellations, length<br>of stay, satisfaction,<br>anxiety (VAS),<br>willingness to pay<br>(WTP) |

1  
2  
3  
4  
5  
6  
7  
8  
9  
10  
11  
12  
13  
14  
15  
16  
17  
18  
19  
20  
21  
22  
23  
24  
25  
26  
27  
28  
29  
30  
31  
32  
33  
34  
35  
36  
37  
38  
39  
40  
41  
42  
43  
44  
45  
46

|                                         |                                      |                                    |                                                           |                                                                                     |                                    |                                                           |
|-----------------------------------------|--------------------------------------|------------------------------------|-----------------------------------------------------------|-------------------------------------------------------------------------------------|------------------------------------|-----------------------------------------------------------|
| Mendes, 2005[6]<br>Brazil               | 2-group<br>after study<br>(parallel) | April 2007<br>through<br>June 2007 | N=52254,<br>surgery, ASA<br>class not stated              | Preoperative<br>outpatient evaluation<br>clinic (timing not<br>stated)              | Usual care (timing<br>not stated)  | Cancellations,<br>length of stay                          |
| van Klei, 2002[7]<br>The<br>Netherlands | 2-group<br>after study               | November<br>2012                   | N=21553,<br>elective surgery,<br>ASA class mainly<br>I-II | Preoperative<br>outpatient evaluation<br>clinic (average 3 weeks<br>before surgery) | Usual care (day<br>before surgery) | Cancellations, same-<br>day admissions,<br>length of stay |

181

182 ASA: American Society of Anesthesiology; CBA: controlled before-after; MAACL: Multiple Affect Adjective Check List; STAI: State-Trait Anxiety  
 183 Inventory; VAS: visual analogue scale;  
 184 WTP: willingness to pay

For peer review only

1  
2  
3 Considering the intervention, PACs in all studies consisted of an outpatient service whereby  
4 patients were checked for medical conditions that are important for anaesthesia and  
5 informed regarding what to expect on the day of surgery. However, the terminology used for  
6 PACs varied; they served different surgical specialities, and the pre-anaesthesia consultation  
7 was conducted from  $\geq 48$  h to  $\leq 3$  months before the surgery. Three were implemented in a  
8 university hospital,[31,33,34] one in a teaching hospital,[30] one in a medical centre,[32] and  
9 one in a general hospital[29] (one study did not specify the context).[28] The person  
10 conducting the pre-anaesthesia consultation also varied: in five studies, it was the  
11 anaesthesiologists,[28-31,33] in the other studies it was (also) the orthopaedic senior house  
12 officer,[29] the consultant or resident,[34] or the physician.[32] In three studies, nurses were  
13 part of the team assessing the patients.[29-31] The comparison group in all studies was  
14 usual care, which generally involved performing a preoperative anaesthetic evaluation the  
15 day before the surgery on the admitted patients.

16  
17  
18  
19  
20  
21  
22  
23  
24  
25  
26  
27  
28  
29  
30  
31  
32  
33  
34  
35  
36  
37 Of the 77411 patients in the studies, 9626 and 15531 patients were in the intervention and  
38 control groups, respectively. One study did not specify the number of patients in the  
39 intervention and control groups, but only the total number of surgeries performed.[33] Five  
40 studies reported data for sex, showing that 51% of the patients were women and 49% were  
41 men (12129 vs. 11583).[28,30-32,34] There were more females than males both in the  
42 intervention (4345 vs. 4134) and the control groups (7784 vs. 7449). Five studies reported  
43 data for age showing that all the patients were over 20 years old and grouped within the  
44 American Society of Anesthesiology (ASA) category.[28,30-32,34]

1  
2  
3 The patients were scheduled to undergo a variety of surgeries, including orthopaedic,[29-  
4  
5 31,34] urology,[28,30,31,34] general,[30,31,34] heart,[32] gynaecology/obstetrics,  
6  
7 [30,31,34] vascular surgery,[30] ophthalmology,[30] maxillofacial/dental surgery,  
8  
9 [30,34]neurological surgery,[30] and one did not specify the type of surgery.[33] In five  
10  
11 studies, the type of anaesthesia was not specified,[29,30,32-34] and two studies reported  
12  
13 patients for general and/or regional supplement.[28,31]  
14  
15  
16  
17  
18  
19

20 The patients included had previous anaesthetic experience in one study,[28] previous and no  
21  
22 previous anaesthetic experience in another,[34] and five studies did not report this data.[29-  
23  
24 33] Limited background characteristics of the patients were reported in two studies.[29,33]  
25  
26 One stated that the patients included had ASA 3 or 4 and a body mass index of more than  
27  
28 40. However, no ASA number, sex, or age was reported in the article.[29] Mendes *et al.* did  
29  
30 not report any background characteristics of the included patients.[33]  
31  
32  
33  
34

### 35 **Description of the studies' risk of bias**

36  
37 Figure 2. shows the results of the risk of bias assessment. In all seven included studies, the  
38  
39 cause and effect were clear. The majority of the studies measured outcomes in the same  
40  
41 way and used appropriate statistical analyses. Several studies had limitations of follow-up  
42  
43 and similarity in care and participants. None of the patients had multiple pre-and post-  
44  
45 measurements.  
46  
47  
48

### 49 **Outcomes of the included studies**

50 The outcomes of the included studies are described separately below.  
51  
52  
53

#### 54 *Satisfaction*

55  
56 One study reported satisfaction as an outcome.[31] The summarised patient satisfaction  
57  
58 with the anaesthetic consultation score out of 100 showed that patients in the PAC group  
59  
60

1  
2  
3 were more satisfied (mean difference, 2.10%; 95% confidence interval [CI], 0.51–3.70%;  
4  
5  $p=0.01$ ).[31] There was no statistically significant difference between the two groups in the  
6  
7 mean patient satisfaction with perioperative anaesthesia care score out of 5 after surgery  
8  
9 (mean difference 0.01%,  $p=0.94$ ).[31] The mean quality of recovery (QoR) score (range, 0–  
10  
11 18) following anaesthesia on the first day of surgery was similar between the intervention  
12  
13 (13.17±2.73) and control (13.31±2.65) groups ( $p=0.67$ ).[31] The QoR measure is the patients'  
14  
15 health-related quality of life.[35]

### 20 *Anxiety*

22 Three studies reported anxiety.[28,31,34] Two studies reported the visual analogue scale  
23  
24 (VAS), one rated from zero (no anxiety) to ten (very high anxiety),[28] another used a 100  
25  
26 mm horizontal line with “not anxious at all” to “extremely anxious”[31] In one study, the  
27  
28 median VAS anxiety score was 3 (0–5) in the intervention group and 5 (2–8) in the control  
29  
30 group ( $p=0.0038$ ).[28] In another study, there were no significant differences between the  
31  
32 control and intervention groups for levels of anxiety (VAS), surgery (26 vs. 25, respectively,  
33  
34  $p=0.12$ ), and anaesthesia (20 vs. 19, respectively,  $p=0.60$ ).[31] The median Multiple Affect  
35  
36 Adjective Check List (MAACL) score with possible range scores from 0 to 21 (higher scores  
37  
38 indicating greater levels of anxiety) was 3 (0–9) in the intervention group and 6.5 (2–12) in  
39  
40 the control group ( $p=0.0053$ ).[28] The differences in the State-Trait Anxiety Index (STAI)  
41  
42 score, which is composed of 40 questions rated on a 4-point Likert scale, was 1.51, 95% CI:  
43  
44 1.02–2.02%,  $p=0.0051$ ).[34] The results on anxiety in these two studies were significant.  
45  
46  
47 However, Kamau *et al.*[34] found no differences when they examined anxiety and the  
48  
49 influences of sex, duration of hospital stay, and prior anaesthesia experience.

### 56 *Mortality*



1  
2  
3 One study reported the mortality rates.[29] Patients attending the High Dependency Unit  
4 (HDU), Intensive Care Unit (ICU), and Post-anaesthesia Care Unit (PACU) following complex  
5  
6 orthopaedic surgery had a significant reduction in mortality rate after being assessed in the  
7  
8 PAC, from 18 (6.1%) of 298 patients before to 14 (1.2%) of 1147 patients after  $p=0.001$ . [29]  
9  
10  
11

### 12 *Cancellation rate*

13  
14  
15 Three studies reported a reduced cancellation rate following the establishment of a  
16  
17 PAC.[30,32,33] One of the included studies had 316 (2.0%) cancellations for medical reasons  
18  
19 before the introduction of PAC, and 79 (0.9%) after, and a difference of 1.02% (95% CI, 0.31–  
20  
21 1.31%). After adjustment, the odds ratio was 0.7 (95% CI, 0.5–0.9%). [30] The overall  
22  
23 cancellation of surgery was reduced from 1027 (6.3%) to 393 (4.6%) following surgery, and a  
24  
25 difference of 0.9% (95% CI, 0.3–1.0%) when patients were assessed in PAC.[30] Mendes *et*  
26  
27 *al.*[33] found a decrease in overall cancellations from year 1 (39.3%) to year 4 (15.9%),  $p\leq$   
28  
29 0.05. There were 469 (number of cancellations)/10639 (number of surgeries performed) due  
30  
31 to medical reasons in the first year of this study. The following year, a considerable increase  
32  
33 above the baseline values in the intervention group was observed, followed by a progressive  
34  
35 decrease in the last year with 391 (number of cancellations)/10397 (number of surgeries  
36  
37 performed).[33] Farasatkish *et al.* reported that of the 1716 patients studied, 15.1 % of cases  
38  
39 cancelled in the two groups. The cancellation rates in the control group were 146/866  
40  
41 (16.8%), and the cancellation rate in the intervention group was 113/850 (13.29%)  $p=0.046$ .  
42  
43 The most common reason for cancellation was incomplete medical work-up 51/146 (35%) in  
44  
45 the control group and 32/113 (28%) in the intervention group,  $p=0.03$ . [32] Lee *et al.* found  
46  
47 similar rates for surgery being cancelled on the scheduled date for the intervention group  
48  
49 compared to the control group (2.3% vs. 3.4%,  $p=0.75$ ). [31]  
50  
51  
52  
53  
54  
55  
56  
57  
58  
59  
60

### *Costs and willingness to pay*

Two studies reported the costs.[29,31] One study reported a total saving of £ 486.62 per patient after establishing a PAC.[29] Another study reported a significantly lower preoperative cost per patient in the intervention group compared to the control group (mean difference, \$ 463; 95% CI, -\$648 to -\$278 per patient,  $p<0.01$ ).[31] However, the mean difference in the total perioperative treatment cost was not significant, even after adjusting for cancellation on the day of surgery costs.[31] The intervention group patients were willing to pay (WTP) significantly more than the median WTP (US \$13) for a clinic consultation at the PAC than the control group.[31]

### *Length of stay*

The length of stay was reported in four studies.[29-31,33] Mendes *et al.*[33] found a significant decrease in mean hospital stay for patients from 6.2 to 5.0 days ( $p \leq 0.001$ ) during the four years of this study. Van Klein *et al.*[30] found that the total admission time significantly decreased from a mean of 8.8 days (before) and a mean of 8.1 days (after) and 0.92 (0.90–0.94). After adjusting for age, sex, and introduction date of PAC this difference was 0.92 (0.90–0.94).[30] Kamal *et al.*[29] found a significant reduction in the length of stay in the high dependency unit from 2.1 days to 1.6 d ( $p=0.01$ ), and in the intensive care unit from 2.3 days to 1.9 days ( $p=0.01$ ). In the last study, no significant changes were found in the median duration of postoperative stay between the intervention and control groups.[31]

### *Organisation planning and efficiency*

Organisation planning and efficiency have been reported in two studies.[29,33] One study found statistically significant changes in the reduction of unplanned admissions to the PACU (65/298 [22%], 111/1147 [10%],  $p=0.001$ ), ICU (4/298 [1.3%], 4/1147 [0.4%],  $p=0.01$ ), and HDU (4/298 [1.34%], 20/1147 [1.7%],  $p=0.01$ ) after implementing a PAC.[29] The planned

1  
2  
3 admissions in the ICU (4/298 [1.3%], 18/1147 [1.6%],  $p=0.01$ ), and HDU (14/298 [4.7%],  
4  
5 85/1147 [7.4%],  $p=0.1$ ) increased after implementing a PAC.[29] The number of PAC  
6  
7 evaluations increased from year 1, 4704 to year 4, 13990 ( $p\leq 0.001$ ).[33] The number of  
8  
9 outpatient procedures increased from 2170 (year 1) to 1943 (year 4) ( $p\leq 0.001$ ), and the  
10  
11 inpatient procedures decreased from 9556 (year 1) to 8449 (year 4), ( $p\leq 0.001$ ).[33]  
12  
13  
14  
15

## 16 **DISCUSSION**

17  
18 This systematic review summarises the effectiveness of PACs in improving quality and  
19  
20 patient safety in general hospitals and determines the gaps in existing knowledge for future  
21  
22 research. Seven studies that met the inclusion criteria were included. We present the main  
23  
24 results and infer the implications for research and practice in the following text.  
25  
26  
27  
28  
29  
30

31  
32 Cancellation on the day of surgery has undesirable effects on both the patients and the  
33  
34 hospital system.[14] Thus, studies have found that late patient-related cancellations could  
35  
36 totally or partially be prevented,[36] if they were addressed during preoperative  
37  
38 evaluations.[14,15] This is confirmed by several studies in this systematic review that found  
39  
40 a reduction in surgery cancellation after implementing a PAC.[30,32,33] However, Lee *et al.*  
41  
42 found no significant changes between the intervention and control groups.[31] Mendes and  
43  
44 colleagues found that the number of cancellations for medical reasons after PAC  
45  
46 implementation decreased in the first year of implementation. In the second and third years,  
47  
48 they were higher before the number dropped to below baseline.[33] These conflicting  
49  
50 findings might show that hospitals operate in a specific context, with unique populations,  
51  
52 processes, and microsystems, which may encounter unique obstacles making  
53  
54 implementation difficult. Patient-focused interventions need to consider barriers,  
55  
56  
57  
58  
59  
60

1  
2  
3 facilitators, and interrelationships between systems, staff, and interventions to increase the  
4  
5 likelihood of sustainable success.[37] In addition, Kamau *et al.* also indicated that PACs lead  
6  
7 to more planned admissions to the ICU, HDU, and PACU, which is more predictable for  
8  
9 patients, staff, and administrations.[34]  
10  
11

12  
13  
14 Another main finding of this systematic review was a significant reduction in the length of  
15  
16 hospital stay following patients' examination in a PAC; however, a small number of studies  
17  
18 with low quality were considered. Nevertheless, similar results were found in another  
19  
20 systematic review claiming that perioperative systems support hospitals to address the  
21  
22 expected growth in the number and complexity of surgical procedures being performed.[15]  
23  
24 However, Lee *et al.* indicated that the reason for the reduced length of hospital stay was the  
25  
26 mean duration of stay before surgery in the intervention group.[31] This indicates that when  
27  
28 patients are examined in the PAC and well prepared with information, consultations, and  
29  
30 tests, they do not need to be hospitalised until the day of surgery. A survey focusing on  
31  
32 patients operated showed that if they had a choice, 75% do not wish to be admitted to the  
33  
34 hospital until the same day of operation. One of the main reasons was to spend less time in  
35  
36 the hospital.[38] However, an updated systematic review on the effectiveness of nurse-led  
37  
38 preoperative assessment services for elective surgery found that the included articles had a  
39  
40 reduced length of stay. The included studies had low methodological quality, and therefore,  
41  
42 the authors could not conclude that this service leads to reduced length of hospital stay.[16]  
43  
44  
45  
46  
47  
48  
49  
50

51  
52  
53 The evidence from this systematic review is insufficient to conclude whether patients have  
54  
55 reduced anxiety when assessed using PAC. The included studies used different instruments  
56  
57 to measure the levels of anxiety, and the results could not be pooled. In addition, previous  
58  
59  
60

1  
2  
3 studies have shown that anxiety levels were higher in women.[39] Seventy-eight per cent of  
4  
5 the participants were women in one of the included studies in this systematic review and  
6  
7 might result in a bias in this study.[34] Anxiety was also statistically higher in patients who  
8  
9 underwent general anaesthesia than in those who underwent regional anaesthesia.[40] The  
10  
11 included studies on anxiety included both patients with general and regional anaesthesia,  
12  
13 which might also be biased. Furthermore, the patients included in this review had both  
14  
15 former surgical experience and no experience with surgery. However, studies have shown  
16  
17 that former experience with anaesthesia and surgery reduces the risk of preoperative  
18  
19 anxiety.[41]  
20  
21  
22  
23  
24  
25  
26  
27

28 Assessment of PAC was significantly associated with reduced mortality following complex  
29  
30 orthopaedic surgery.[29] Previously published retrospective studies found similar results,  
31  
32 but with other types of surgery.[42,43] A Danish study found that deaths attributed to  
33  
34 anaesthesia were associated with insufficient or inadequate preoperative evaluation.[7]  
35  
36 Furthermore, a previous study pointed out that the risk factors are not only patient-related  
37  
38 but also organisation-related,[8] and that some hospitals have perioperative care and teams  
39  
40 that are better at identifying and rescuing perioperative complications.[44,45] However,  
41  
42 Blitz *et al.* argued that PAC should focus on early patient engagement strategies,  
43  
44 interdisciplinary team communication, detailed perioperative care plans, and patient  
45  
46 documentation in the electronic health record. This record should be open for review by the  
47  
48 perioperative team to preserve patient information and safety. The value of a PAC lies in its  
49  
50 ability to improve the quality of the perioperative process by designing a more robust  
51  
52 system for preoperative assessment and preparation.[42] The importance of safety in  
53  
54  
55  
56  
57  
58  
59  
60

1  
2  
3 anaesthesia is a vital component in anaesthesia practice, and the use of PACs contributes to  
4  
5 this critical area.  
6  
7

### 8 **Strengths and limitations of the study**

9

10 Most review steps were performed in duplicate or independently by two researchers, and  
11  
12 agreement was reached in a consensus meeting. However, grey literature, such as  
13  
14 government and institutional documents, was not included and might be a limitation to this  
15  
16 study. Since countries have different organisational structures in their healthcare systems,  
17  
18 we did not set inclusion criteria concerning who performed the patient's preoperative  
19  
20 assessment. However, the European Society of Anaesthesiology guidelines recommend that  
21  
22 anaesthesiologists complete the preoperative assessment, while trained nurses or  
23  
24 anaesthesia trainees perform the screening.[8] A preoperative evaluation performed by an  
25  
26 internist has been associated with increased length of stay and increased postoperative  
27  
28 mortality.[46] This systematic review's results were possibly affected by the heterogeneity in  
29  
30 the types of staff performing the preoperative assessment.  
31  
32  
33  
34  
35  
36  
37  
38  
39

40 We opted to include only the studies with the highest internal validity. Thus, we excluded  
41  
42 several retrospective studies. Nonetheless, the remaining studies' risk of bias was fairly high,  
43  
44 and they were heterogeneous. As a result, meta-analyses were not statistically  
45  
46 appropriate.[25] The included studies' designs could not rule out selection bias and  
47  
48 confounding, and the strength of the evidence should be assessed cautiously. Many studies  
49  
50 did not make adjustments for several confounders, which could be responsible for the  
51  
52 observed effects. Several studies lacked descriptions of the methods used and the patients  
53  
54 included, which lowered the transparency. It is not very reassuring that many such studies  
55  
56 were unable to deliver more thorough evidence to guide practice and should be assessed  
57  
58  
59  
60

1  
2  
3 cautiously. The results are relevant to health care services, which should focus on the well-  
4  
5 being and safety of the patients.  
6

### 7 8 **Implications for future research and practice** 9

10 This systematic review identified the ambiguity in the PAC interventions offered to the  
11  
12 intervention group. In many studies, it was evident that the methods used in these studies  
13  
14 were not always clearly described, and high-quality research is needed in this field. The  
15  
16 included studies in this review did not contain any results of reduced preoperative tests,  
17  
18 such as blood tests, on patients before surgery when patients attended the PAC,[47,48] and  
19  
20 earlier surgical room entry time for patients assessed in PACs,[49,50] similar to previous  
21  
22 retrospective studies. Other implications for future research might be the organisation  
23  
24 structure of different PACS and their functioning. The use of technology, such as streaming  
25  
26 services, facilitates different types of patient groups and might be more important with the  
27  
28 appearance of Covid-19 in reducing human contact and spread of the virus.  
29  
30  
31  
32  
33

### 34 35 **CONCLUSION** 36

37 This systematic review suggests that PAC use reduces the length of hospital stay, and the  
38  
39 majority of the studies had reduced the cancellation rate in hospitals. These findings are an  
40  
41 essential contribution to the current evidence in this field. In addition to further research in  
42  
43 this field, the demand for increased high-quality studies to capture robust data describing  
44  
45 the quality of care and clinical outcomes for patients requiring anaesthesia. This step  
46  
47 demands increased focus and funding for this specific area of health services research and  
48  
49 could, therefore, lead to new implementations of PAC's in health care services and further  
50  
51 develop patient safety in perioperative care.  
52  
53  
54  
55  
56  
57  
58  
59  
60

### **Acknowledgement**

We thank the librarian Ellen Sejerstedt, University of Agder, Kristiansand, for helping with the search strategy and removal of duplicates.

### **Competing Interests**

The authors declare that they have no conflict of interest.

### **Data sharing statement**

All data relevant to the study are included within the article or have been uploaded within supplemental files.

### **Funding**

This research received no specific grant from any funding agency in the public, commercial or not-for-profit sectors.

### **Author statement**

EWK, MF, AO and TOT: Study design

EWK, MF: Search and screening of the articles

EWK: Data extraction

MF, AO, RB and TOT: Control of data extraction

EWK, MF, AO and RB: Quality assessment of the included articles

EWK: Drafting of the manuscript

MF, AO, RB, and TOT: Contribution to and review of the final version of the manuscript

MF, AO, RB and TOT: Supervised the study



## References

- 1 Braz LG, Braz DG, Da Cruz DS, et al. Mortality in anesthesia: a systematic review. *Clinics (Sao Paulo)* 2009;**64**:999–1006. doi: [10.1590/S1807-59322009001000011](https://doi.org/10.1590/S1807-59322009001000011).
- 2 Santos ML, Novaes CO, Iglesias AC. Epidemiological profile of patients seen in the pre-anesthetic assessment clinic of a university hospital. *Braz J of Anesthesiol* 2017;**67**:457–67. doi: [doi.org/10.1016/j.bjane.2017.04.006](https://doi.org/10.1016/j.bjane.2017.04.006).
- 3 Amaya F, Shimamoto S, Matsuda M, et al. Preoperative anesthesia clinic in Japan: a nationwide survey of the current practice of preoperative anesthesia assessment. *J Anesth* 2015;**29**:175–9. doi: [10.1007/s00540-014-1918-3](https://doi.org/10.1007/s00540-014-1918-3) [Published online first: 2014/09/30].
- 4 Whitaker DK, Brattebø G, Smith AF et al. The Helsinki Declaration on Patient Safety in Anaesthesiology: putting words into practice. *Best Pract Res Clin Anaesthesiol* 2011;**25**:277–90. doi: [10.1016/j.bpa.2011.02.001](https://doi.org/10.1016/j.bpa.2011.02.001).
- 5 Bainbridge D, Martin J, Arango M, et al. Perioperative and anaesthetic-related mortality in developed and developing countries: a systematic review and meta-analysis. *Lancet* 2012;**380**:1075–81. doi: [10.1016/S0140-6736\(12\)60990-8](https://doi.org/10.1016/S0140-6736(12)60990-8).
- 6 Kluger MT, Tham EJ, Coleman NA, et al. Inadequate pre-operative evaluation and preparation: a review of 197 reports from the Australian Incident Monitoring Study. *Anaesthesia* 2000;**55**:1173–78. doi: [10.1046/j.1365-2044.2000.01725.x](https://doi.org/10.1046/j.1365-2044.2000.01725.x).
- 7 Hove LD, Steinmetz J, Christoffersen JK, et al. Analysis of deaths related to anesthesia in the period 1996–2004 from closed claims registered by the Danish Patient Insurance Association. *Anesthesiology* 2007;**106**:675–80. doi: [10.1097/01.anes.0000264749.86145.e5](https://doi.org/10.1097/01.anes.0000264749.86145.e5) [Published online first: 2007/04/07].

- 1  
2  
3 8 De Hert S, Imberger G, Carlisle J, et al. Preoperative evaluation of the adult patient  
4  
5 undergoing non-cardiac surgery: guidelines from the European Society of  
6  
7 Anaesthesiology. *Eur J Anaesthesiol* 2011;**28**:684–722. doi:  
8  
9 [10.1097/EJA.0b013e3283499e3b](https://doi.org/10.1097/EJA.0b013e3283499e3b).  
10  
11  
12  
13 9 Haller G, Laroche T, Clergue F. Morbidity in anaesthesia: today and tomorrow. *Best*  
14  
15 *Pract Res Clin Anaesthesiol* 2011;**25**:123–32. doi: [10.1016/j.bpa.2011.02.008](https://doi.org/10.1016/j.bpa.2011.02.008)  
16  
17 [Published online first: 2011/05/10].  
18  
19  
20 10 Lee JA. The anaesthetic out-patient clinic. *Anaesthesia* 1949;**4**:169–74. doi:  
21  
22 [10.1111/j.1365-2044.1949.tb05837.x](https://doi.org/10.1111/j.1365-2044.1949.tb05837.x).  
23  
24  
25 11 Chan FW, Wong F, Cheung YS, et al. Utility of a preoperative assessment clinic in a  
26  
27 tertiary care hospital. *Hong Kong Med J* 2011;**17**:441–5 [Published online first:  
28  
29 2011/12/08].  
30  
31  
32 12 Hariharan S, Chen D, Merritt-Charles L. Evaluation of the utilization of the  
33  
34 preanaesthetic clinics in a university teaching hospital. *BMC Health Serv Res*  
35  
36 2006;**6**:59. doi: [10.1186/1472-6963-6-59](https://doi.org/10.1186/1472-6963-6-59) [Published online first: 2006/05/25].  
37  
38  
39 13 Schmiesing CA, Brodsky JB. The preoperative anesthesia evaluation. *Thorac Surg*  
40  
41 *Clin.*2005;15:305–15. doi: [10.1016/j.thorsurg.2005.02.006](https://doi.org/10.1016/j.thorsurg.2005.02.006).  
42  
43  
44 14 Lew E, Pavlin DJ, Amundsen L. Outpatient preanaesthesia evaluation clinics.  
45  
46 *Singapore Med J* 2004;**45**:509–16.  
47  
48  
49 15 Lee A, Kerridge RK, Chui PT, et al. Perioperative Systems as a quality model of  
50  
51 perioperative medicine and surgical care. *Health Policy* 2011;**102**:214–22. doi:  
52  
53 [10.1016/j.healthpol.2011.05.009](https://doi.org/10.1016/j.healthpol.2011.05.009) [Published online first: 2011/06/18].  
54  
55  
56  
57  
58  
59  
60

- 1  
2  
3 16 Hines S, Munday J, Kynoch K. Effectiveness of nurse-led preoperative assessment  
4 services for elective surgery: a systematic review update. *JBI Database Syst Rev*  
5  
6 *Implement Rep* 2015;**13**:279–317. doi: [10.11124/jbisrir-2015-1996](https://doi.org/10.11124/jbisrir-2015-1996).  
7  
8  
9  
10 17 Delaney D, Bayley EW, Olszewsky P, et al. Parental satisfaction with pediatric  
11 preoperative assessment and education in a presurgical care center. *J Perianesth*  
12  
13 *Nurs* 2015;**30**:290–300. doi: [10.1016/j.jopan.2014.04.004](https://doi.org/10.1016/j.jopan.2014.04.004).  
14  
15  
16  
17 18 Davidson S, McKendrick D, French T. Preassessment clinic interview and patient  
19 anxiety. *Saudi J Anaesth* 2016;**10**:402–08. doi: [10.4103/1658-354X.177339](https://doi.org/10.4103/1658-354X.177339).  
20  
21  
22  
23 19 Turunen E, Miettinen M, Setälä L, et al. The impact of a structured preoperative  
24 protocol on day of surgery cancellations. *J Clin Nurs* 2018;**27**:288–305. doi:  
25  
26 [10.1111/jocn.13896](https://doi.org/10.1111/jocn.13896).  
27  
28  
29  
30 20 Holt NF, Silverman DG, Prasad R, et al. Preanesthesia clinics, information  
31 management, and operating room delays: results of a survey of practicing  
32 anesthesiologists. *Anesth Analg* 2007;**104**:615–18. doi:  
33  
34 [10.1213/01.ane.0000255253.62668.3a](https://doi.org/10.1213/01.ane.0000255253.62668.3a).  
35  
36  
37  
38  
39  
40 21 <http://www.training.cochrane.org/handbook> accessed 08.12.2018, 2019 updated  
41 July 2019.  
42  
43  
44  
45 22 Moher D, Liberati A, Tetzlaff J, et al. Preferred Reporting Items for Systematic  
46 Reviews and Meta-Analyses: the PRISMA statement. *BMJ* 2009;**339**:b2535. doi:  
47  
48 [10.1136/bmj.b2535](https://doi.org/10.1136/bmj.b2535).  
49  
50  
51  
52 23 Kristoffersen EW, Opsal A, Tveit TO, et al. Pre-anaesthetic assessment clinic for  
53 elective surgery patients: a systematic review and meta-analysis. *Prospero*  
54  
55 2019;CRD42019137724.  
56  
57  
58  
59  
60

- 1  
2  
3 24 Booth A, Sutton A, Papaioannou D. *Systematic approaches to a successful literature*  
4 *review*. Los Angeles California: Sage 2016.  
5  
6  
7  
8 25 Møller AM, Myles PS. What makes a good systematic review and meta-analysis? *Br J*  
9 *Anaesth* 2016;**117**:428–30. doi: [10.1093/bja/aew264](https://doi.org/10.1093/bja/aew264).  
10  
11  
12  
13 26 <https://www.covidence.org/reviews/active> accessed 29.09.2018  
14  
15 27 Tufanaru C, Munn Z, Aromataris E, et al. Systematic review of effectiveness. In:  
16 Aromataris E, Munn Z, eds. *JBIM Manual for evidence synthesis*. 2020.  
17  
18 28 Klopfenstein CE, Forster A, Van Gessel E. Anesthetic assessment in an outpatient  
19 consultation clinic reduces preoperative anxiety. *Can J Anaesth* 2000;**47**:511–5. doi:  
20 [10.1007/BF03018941](https://doi.org/10.1007/BF03018941) [Published online first: 2000/06/30].  
21  
22  
23  
24  
25  
26  
27 29 Kamal T, Conway RM, Littlejohn I, et al. The role of a multidisciplinary pre-assessment  
28 clinic in reducing mortality after complex orthopaedic surgery. *Ann R Coll Surg Engl*  
29 2011;**93**:149–51. doi: [10.1308/003588411X561026](https://doi.org/10.1308/003588411X561026).  
30  
31  
32  
33  
34  
35 30 van Klei WA, Moons KG, Rutten CL, et al. The effect of outpatient preoperative  
36 evaluation of hospital inpatients on cancellation of surgery and length of hospital  
37 stay. *Anesth Analg* 2002;**94**:644–9. doi:[10.1097/00000539-200203000-00030](https://doi.org/10.1097/00000539-200203000-00030).  
38 [Published online first: 2002/02/28].  
39  
40  
41  
42  
43  
44 31 Lee A, Chui PT, Chiu CH, et al. The cost-effectiveness of an outpatient anesthesia  
45 consultation clinic before surgery: a matched Hong Kong cohort study. *Perioper Med*  
46 2012;**1**:3. doi: [10.1186/2047-0525-1-3](https://doi.org/10.1186/2047-0525-1-3) [Published online first: 2012/01/01].  
47  
48  
49  
50  
51  
52 32 Farasatkish R, Aghdaii N, Azarfarin R, et al. Can preoperative anesthesia consultation  
53 clinic help to reduce operating room cancellation rate on the day of surgery? *Rawal*  
54 *Med J* 2009;**34**:26–8.  
55  
56  
57  
58  
59  
60

- 1  
2  
3 33 Mendes FF, Mathias LA, Duval Neto GF, et al. Impact of preoperative outpatient  
4 evaluation clinic on performance indicators. *Rev Bras anesthesiol* 2005;**55**:175–87. doi:  
5 [10.1590/S0034-70942005000200004](https://doi.org/10.1590/S0034-70942005000200004).  
6  
7  
8  
9  
10 34 Kamau A, Mung'ayi V, Yonga G. The effect of a preanaesthesia clinic consultation on  
11 adult patient anxiety at a tertiary hospital in Kenya: a cohort study. *Afr Health Sci*  
12 2017;**17**:138–46. doi: [10.4314/ahs.v17i1.18](https://doi.org/10.4314/ahs.v17i1.18) [Published online first: 2017/10/14].  
13  
14  
15  
16  
17 35 Myles PS, Hunt JO, Nightingale CE, et al. Development and psychometric testing of a  
18 quality of recovery score after general anesthesia and surgery in adults. *Anesth Analg*  
19 1999;**88**:83–90. doi: [10.1097/00000539-199901000-00016](https://doi.org/10.1097/00000539-199901000-00016) [Published online first:  
20 1999/01/23].  
21  
22  
23  
24  
25  
26  
27 36 Hänninen-Khoda L, Koljonen V, Ylä-Kotola T. Patient-related reasons for late surgery  
28 cancellations in a plastic and reconstructive surgery department. *JPRAS Open*  
29 2018;**18**:38–48. doi: [10.1016/j.jpra.2018.08.002](https://doi.org/10.1016/j.jpra.2018.08.002).  
30  
31  
32  
33  
34 37 Geerligs L, Rankin NM, Shepherd HL, et al. Hospital-based interventions: a systematic  
35 review of staff-reported barriers and facilitators to implementation processes.  
36  
37  
38  
39  
40  
41  
42  
43 38 Harries RL, Bradshaw CA, Jones EA, et al. To admit or not to admit on the morning of  
44 surgery: patients' perspectives on day of surgery admission. *J Perioper Pract*  
45 2013;**23**:56–8. doi: [10.1177/175045891302300304](https://doi.org/10.1177/175045891302300304).  
46  
47  
48  
49 39 Mitchell M. Anaesthesia type, gender and anxiety. *J Perioper Pract* 2013;**23**:41–7. doi:  
50 [10.1177/175045891302300301](https://doi.org/10.1177/175045891302300301) [Published online first: 2013/04/17].  
51  
52  
53  
54 40 Celik F, Edipoglu IS. Evaluation of preoperative anxiety and fear of anesthesia using  
55 APAIS score [Report]. *Eur J Med Res* 2018;**23**:41. doi: [10.1186/s40001-018-0339-4](https://doi.org/10.1186/s40001-018-0339-4).  
56  
57  
58  
59  
60

- 1  
2  
3 41 Caumo W, Schmidt AP, Schneider CN, et al. Risk factors for preoperative anxiety in  
4  
5 adults. *Acta Anaesthesiol Scand* 2001;**45**:298–307. doi: [10.1034/j.1399-](https://doi.org/10.1034/j.1399-6576.2001.045003298.x)  
6  
7 [6576.2001.045003298.x](https://doi.org/10.1034/j.1399-6576.2001.045003298.x) [Published online first: 2001/02/24].  
8  
9  
10 42 Blitz JD, Kendale SM, Jain SK, et al. Preoperative evaluation clinic visit is associated  
11  
12 with decreased risk of in-hospital postoperative mortality. *Anesthesiology*  
13  
14 2016;**125**:280–94. doi: [10.1097/ALN.0000000000001193](https://doi.org/10.1097/ALN.0000000000001193) [Published online first:  
15  
16 2016/07/21].  
17  
18  
19 43 Cantlay KL, Baker S, Parry A, et al. The impact of a consultant anaesthetist led pre-  
20  
21 operative assessment clinic on patients undergoing major vascular surgery.  
22  
23 *Anaesthesia* 2006;**61**:234–9. doi: [10.1111/j.1365-2044.2005.04514.x](https://doi.org/10.1111/j.1365-2044.2005.04514.x) [Published  
24  
25 online first: 2006/02/17].  
26  
27  
28 44 Savoldelli GL. Perioperative care is a hazardous business: let's make it safer! *Trends*  
29  
30 *Anaesth Crit Care* 2016;**7–8**:3–4. doi: [10.1016/j.tacc.2016.05.003](https://doi.org/10.1016/j.tacc.2016.05.003).  
31  
32  
33 45 Pearse RM, Moreno RP, Bauer P, et al. Mortality after surgery in Europe: a 7 day  
34  
35 cohort study. *Lancet* 2012;**380**:1059–65. doi: [10.1016/S0140-6736\(12\)61148-9](https://doi.org/10.1016/S0140-6736(12)61148-9).  
36  
37  
38 46 Wijeysondera DN, Austin PC, Beattie WS, et al. Outcomes and processes of care  
39  
40 related to preoperative medical consultation. *Arch Intern Med* 2010;**170**:1365–74.  
41  
42 doi: [10.1001/archinternmed.2010.204](https://doi.org/10.1001/archinternmed.2010.204).  
43  
44  
45 47 Fischer SP. Development and effectiveness of an anesthesia preoperative evaluation  
46  
47 clinic in a teaching hospital. *Anesthesiology* 1996;**85**:196–206. doi:  
48  
49 [10.1097/00000542-199607000-00025](https://doi.org/10.1097/00000542-199607000-00025) [Published online first: 1996/07/01].  
50  
51  
52 48 Power LM, Thackray NM. Reduction of preoperative investigations with the  
53  
54 introduction of an anaesthetist-led preoperative assessment clinic. *Anaesth Intensive*  
55  
56  
57  
58  
59  
60

1  
2  
3 *Care* 1999;**27**:481–8. doi: [10.1177/0310057X9902700508](https://doi.org/10.1177/0310057X9902700508) [Published online first:  
4  
5 1999/10/16].  
6  
7

8 49 Ferschl MB, Tung A, Sweitzer BB, et al. Preoperative clinic visits reduce operating  
9  
10 room cancellations and delays. *Anesthesiology* 2005;**103**:855–59. doi:  
11  
12 [10.1097/00000542-200510000-00025](https://doi.org/10.1097/00000542-200510000-00025).  
13  
14

15 50 Correll DJ, Bader AM, Hull MW, et al. Value of preoperative clinic visits in identifying  
16  
17 issues with potential impact on operating room efficiency. *Anesthesiology*  
18  
19 2006;**105**:1254–9; doi: [10.1097/00000542-200612000-00026](https://doi.org/10.1097/00000542-200612000-00026) [Published online first:  
20  
21 2006/11/24].  
22  
23  
24  
25  
26  
27  
28  
29  
30  
31  
32  
33  
34  
35  
36  
37  
38  
39  
40  
41  
42  
43  
44  
45  
46  
47  
48  
49  
50  
51  
52  
53  
54  
55  
56  
57  
58  
59  
60

185

For peer review only

1  
2  
3  
4  
5  
6  
7  
8  
9  
10  
11  
12  
13  
14  
15  
16  
17  
18  
19  
20  
21  
22  
23  
24  
25  
26  
27  
28  
29  
30  
31  
32  
33  
34  
35  
36  
37  
38  
39  
40  
41  
42  
43  
44  
45  
46  
47  
48  
49  
50  
51  
52  
53  
54  
55  
56  
57  
58  
59  
60



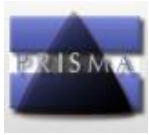

**Figure 1: PRISMA Flow Diagram**

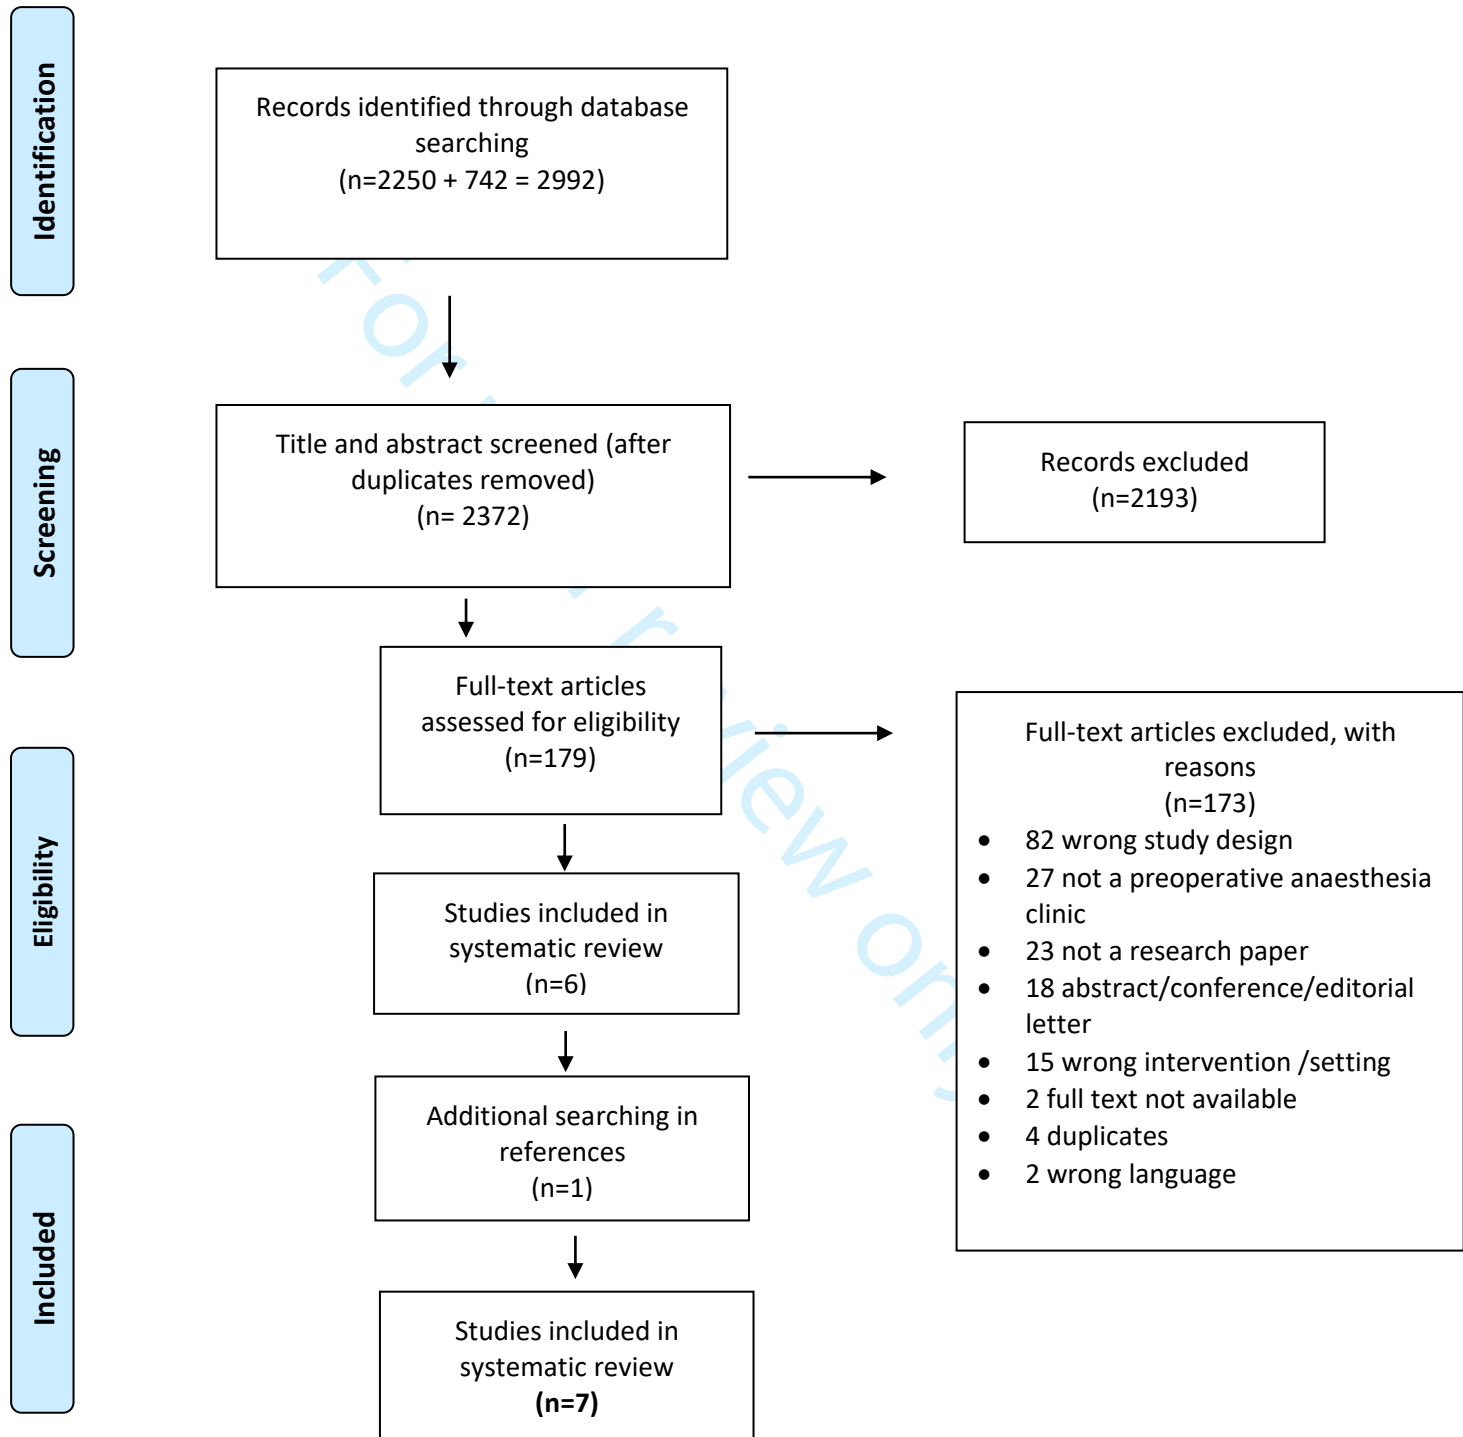

From: Moher D, Liberati A, Tetzlaff J, Altman DG, The PRISMA Group (2009). Preferred Reporting Items for Systematic Reviews and Meta-Analyses: The PRISMA Statement. PLoS Med 6(7): e1000097. doi:10.1371/journal.pmed1000097

For more information, visit [www.prisma-statement.org](http://www.prisma-statement.org).

For peer review only - <http://bmjopen.bmj.com/site/about/guidelines.xhtml>

Figure 2: The risk of bias assessment

|                   | Are cause and effect clear? | Are comparison participants similar? | Did comparison participants have similar care? | Was there a control group? | Were there multiple pre post measurements? | Was follow-up complete? | Were outcomes measured the same way? | Were outcomes measured in reliable way? | Was appropriate stat analysis used? |
|-------------------|-----------------------------|--------------------------------------|------------------------------------------------|----------------------------|--------------------------------------------|-------------------------|--------------------------------------|-----------------------------------------|-------------------------------------|
| Farasatkish 2009  | +                           | +                                    | ?                                              | +                          | -                                          | ?                       | +                                    | +                                       | +                                   |
| Kamal 2011        | +                           | ?                                    | ?                                              | +                          | -                                          | ?                       | ?                                    | ?                                       | ?                                   |
| Kamau 2017        | +                           | +                                    | -                                              | +                          | -                                          | +                       | +                                    | +                                       | +                                   |
| Klopfenstein 2000 | +                           | -                                    | +                                              | +                          | -                                          | ?                       | +                                    | +                                       | +                                   |
| Lee 2012          | +                           | +                                    | -                                              | +                          | -                                          | ?                       | +                                    | +                                       | +                                   |
| Mendes 2005       | +                           | ?                                    | ?                                              | +                          | -                                          | ?                       | ?                                    | ?                                       | +                                   |
| van Klei 2002     | +                           | +                                    | -                                              | +                          | -                                          | ?                       | +                                    | +                                       | +                                   |

1  
2  
3 Database: Ovid MEDLINE(R) ALL <1946 to February 03, 2020>

4 Search Strategy:  
5  
6 -----  
7

- 8 1 ((pre-operativ\* or preoperativ\* or pre operativ\*) and (assessment\* or measurement\* or  
9 evaluat\*)).ti. (6182)  
10  
11 2 (clinic\* or unit\* or nurs\* or outpatient\* or ward\* or center\* or centre\*).ti. (1472922)  
12  
13 3 1 and 2 (478)  
14  
15 4 ((preanaesthe\* or pre-anaesthe\* or pre anaesthe\* or pre-anesthe\* or preanesthe\* or pre  
16 anesthe\*) adj4 (assessment\* or measurement\* or evaluat\* or clinic\* or nurs\* or unit\* or outpatient\* or  
17 ward\* or center\* or centre\*).ti,ab. (572)  
18  
19 5 (((pre-admiss\* or preadmiss\*) adj4 (assessment\* or measurement\* or evaluat\* or clinic\* or unit\* or  
20 nurs\* or outpatient\* or ward\* or centre\* or center\*)) and (surg\* or anaesthe\* or anesthe\* or  
21 preoperativ\* or pre-operativ\* or preanaesthe\* or pre-anaesthe\* or pre anaesthe\* or pre-anesthe\* or  
22 preanesthe\* or pre anesthe\*).ti,ab. (241)  
23  
24 6 ((anaesthe\* or anasthe\* or anesthe\*) adj4 outpatient\* adj4 clinic\*).ti,ab. (138)  
25  
26 7 ((pre-admiss\* or preadmiss\*) adj4 (center\* or centre\*) adj4 (evaluat\* or assessment\* or  
27 measurement\*).ti,ab. (4)  
28  
29 8 or/3-7 (1409)  
30  
31 9 limit 8 to yr="1996 -Current" (1105)

32 \*\*\*\*\*  
33  
34  
35  
36  
37  
38  
39  
40  
41  
42  
43  
44  
45  
46  
47  
48  
49  
50  
51  
52  
53  
54  
55  
56  
57  
58  
59  
60

# Reporting checklist for systematic review and meta-analysis.

Based on the PRISMA guidelines.

## Instructions to authors

Complete this checklist by entering the page numbers from your manuscript where readers will find each of the items listed below.

Your article may not currently address all the items on the checklist. Please modify your text to include the missing information. If you are certain that an item does not apply, please write "n/a" and provide a short explanation.

Upload your completed checklist as an extra file when you submit to a journal.

In your methods section, say that you used the PRISMA reporting guidelines, and cite them as:

Moher D, Liberati A, Tetzlaff J, Altman DG, The PRISMA Group. Preferred Reporting Items for Systematic Reviews and Meta-Analyses: The PRISMA Statement

|                     | Reporting Item                                                                                                                                                                                                                                                                                                                | Page Number |
|---------------------|-------------------------------------------------------------------------------------------------------------------------------------------------------------------------------------------------------------------------------------------------------------------------------------------------------------------------------|-------------|
| <b>Title</b>        |                                                                                                                                                                                                                                                                                                                               |             |
|                     | <a href="#">#1</a> Identify the report as a systematic review, meta-analysis, or both.                                                                                                                                                                                                                                        | 1           |
| <b>Abstract</b>     |                                                                                                                                                                                                                                                                                                                               |             |
| Structured summary  | <a href="#">#2</a> Provide a structured summary including, as applicable: background; objectives; data sources; study eligibility criteria, participants, and interventions; study appraisal and synthesis methods; results; limitations; conclusions and implications of key findings; systematic review registration number | 2           |
| <b>Introduction</b> |                                                                                                                                                                                                                                                                                                                               |             |
| Rationale           | <a href="#">#3</a> Describe the rationale for the review in the context of what is already known.                                                                                                                                                                                                                             | 3-5         |

|    |                                    |                     |                                                                                                                                                                                                                                 |                 |
|----|------------------------------------|---------------------|---------------------------------------------------------------------------------------------------------------------------------------------------------------------------------------------------------------------------------|-----------------|
| 1  | Objectives                         | <a href="#">#4</a>  | Provide an explicit statement of questions being addressed with reference to participants, interventions, comparisons, outcomes, and study design (PICOS).                                                                      | 5               |
| 2  |                                    |                     |                                                                                                                                                                                                                                 |                 |
| 3  |                                    |                     |                                                                                                                                                                                                                                 |                 |
| 4  |                                    |                     |                                                                                                                                                                                                                                 |                 |
| 5  |                                    |                     |                                                                                                                                                                                                                                 |                 |
| 6  | <b>Methods</b>                     |                     |                                                                                                                                                                                                                                 |                 |
| 7  |                                    |                     |                                                                                                                                                                                                                                 |                 |
| 8  |                                    |                     |                                                                                                                                                                                                                                 |                 |
| 9  | Protocol and registration          | <a href="#">#5</a>  | Indicate if a review protocol exists, if and where it can be accessed (e.g., Web address) and, if available, provide registration information including the registration number.                                                | 5               |
| 10 |                                    |                     |                                                                                                                                                                                                                                 |                 |
| 11 |                                    |                     |                                                                                                                                                                                                                                 |                 |
| 12 |                                    |                     |                                                                                                                                                                                                                                 |                 |
| 13 |                                    |                     |                                                                                                                                                                                                                                 |                 |
| 14 | Eligibility criteria               | <a href="#">#6</a>  | Specify study characteristics (e.g., PICOS, length of follow-up) and report characteristics (e.g., years considered, language, publication status) used as criteria for eligibility, giving rationale                           | 6               |
| 15 |                                    |                     |                                                                                                                                                                                                                                 |                 |
| 16 |                                    |                     |                                                                                                                                                                                                                                 |                 |
| 17 |                                    |                     |                                                                                                                                                                                                                                 |                 |
| 18 |                                    |                     |                                                                                                                                                                                                                                 |                 |
| 19 |                                    |                     |                                                                                                                                                                                                                                 |                 |
| 20 |                                    |                     |                                                                                                                                                                                                                                 |                 |
| 21 | Information sources                | <a href="#">#7</a>  | Describe all information sources in the search (e.g., databases with dates of coverage, contact with study authors to identify additional studies) and date last searched.                                                      | 6               |
| 22 |                                    |                     |                                                                                                                                                                                                                                 |                 |
| 23 |                                    |                     |                                                                                                                                                                                                                                 |                 |
| 24 |                                    |                     |                                                                                                                                                                                                                                 |                 |
| 25 |                                    |                     |                                                                                                                                                                                                                                 |                 |
| 26 |                                    |                     |                                                                                                                                                                                                                                 |                 |
| 27 |                                    |                     |                                                                                                                                                                                                                                 |                 |
| 28 | Search                             | <a href="#">#8</a>  | Present full electronic search strategy for at least one database, including any limits used, such that it could be repeated.                                                                                                   | 5 +<br>APPENDIX |
| 29 |                                    |                     |                                                                                                                                                                                                                                 |                 |
| 30 |                                    |                     |                                                                                                                                                                                                                                 |                 |
| 31 |                                    |                     |                                                                                                                                                                                                                                 |                 |
| 32 |                                    |                     |                                                                                                                                                                                                                                 |                 |
| 33 | Study selection                    | <a href="#">#9</a>  | State the process for selecting studies (i.e., for screening, for determining eligibility, for inclusion in the systematic review, and, if applicable, for inclusion in the meta-analysis).                                     | 6               |
| 34 |                                    |                     |                                                                                                                                                                                                                                 |                 |
| 35 |                                    |                     |                                                                                                                                                                                                                                 |                 |
| 36 |                                    |                     |                                                                                                                                                                                                                                 |                 |
| 37 |                                    |                     |                                                                                                                                                                                                                                 |                 |
| 38 | Data collection process            | <a href="#">#10</a> | Describe the method of data extraction from reports (e.g., piloted forms, independently by two reviewers) and any processes for obtaining and confirming data from investigators.                                               | 6               |
| 39 |                                    |                     |                                                                                                                                                                                                                                 |                 |
| 40 |                                    |                     |                                                                                                                                                                                                                                 |                 |
| 41 |                                    |                     |                                                                                                                                                                                                                                 |                 |
| 42 |                                    |                     |                                                                                                                                                                                                                                 |                 |
| 43 |                                    |                     |                                                                                                                                                                                                                                 |                 |
| 44 |                                    |                     |                                                                                                                                                                                                                                 |                 |
| 45 | Data items                         | <a href="#">#11</a> | List and define all variables for which data were sought (e.g., PICOS, funding sources), and any assumptions and simplifications made.                                                                                          | 5-6             |
| 46 |                                    |                     |                                                                                                                                                                                                                                 |                 |
| 47 |                                    |                     |                                                                                                                                                                                                                                 |                 |
| 48 |                                    |                     |                                                                                                                                                                                                                                 |                 |
| 49 |                                    |                     |                                                                                                                                                                                                                                 |                 |
| 50 | Risk of bias in individual studies | <a href="#">#12</a> | Describe methods used for assessing risk of bias in individual studies (including specification of whether this was done at the study or outcome level, or both), and how this information is to be used in any data synthesis. | 6               |
| 51 |                                    |                     |                                                                                                                                                                                                                                 |                 |
| 52 |                                    |                     |                                                                                                                                                                                                                                 |                 |
| 53 |                                    |                     |                                                                                                                                                                                                                                 |                 |
| 54 |                                    |                     |                                                                                                                                                                                                                                 |                 |
| 55 |                                    |                     |                                                                                                                                                                                                                                 |                 |
| 56 |                                    |                     |                                                                                                                                                                                                                                 |                 |
| 57 | Summary measures                   | <a href="#">#13</a> | State the principal summary measures (e.g., risk ratio, difference in means).                                                                                                                                                   | N/A             |
| 58 |                                    |                     |                                                                                                                                                                                                                                 |                 |
| 59 |                                    |                     |                                                                                                                                                                                                                                 |                 |
| 60 |                                    |                     |                                                                                                                                                                                                                                 |                 |

|    |                    |                     |                                                                 |       |
|----|--------------------|---------------------|-----------------------------------------------------------------|-------|
| 1  | Planned            | <a href="#">#14</a> | Describe the methods of handling data and combining             | 7     |
| 2  | methods of         |                     | results of studies, if done, including measures of              |       |
| 3  | analysis           |                     | consistency (e.g., I <sup>2</sup> ) for each meta-analysis.     |       |
| 4  |                    |                     |                                                                 |       |
| 5  |                    |                     |                                                                 |       |
| 6  | Risk of bias       | <a href="#">#15</a> | Specify any assessment of risk of bias that may affect the      | 11-12 |
| 7  | across studies     |                     | cumulative evidence (e.g., publication bias, selective          |       |
| 8  |                    |                     | reporting within studies).                                      |       |
| 9  |                    |                     |                                                                 |       |
| 10 |                    |                     |                                                                 |       |
| 11 | Additional         | <a href="#">#16</a> | Describe methods of additional analyses (e.g., sensitivity or   | N/A   |
| 12 | analyses           |                     | subgroup analyses, meta-regression), if done, indicating        |       |
| 13 |                    |                     | which were pre-specified.                                       |       |
| 14 |                    |                     |                                                                 |       |
| 15 |                    |                     |                                                                 |       |
| 16 |                    |                     |                                                                 |       |
| 17 | <b>Results</b>     |                     |                                                                 |       |
| 18 |                    |                     |                                                                 |       |
| 19 | Study selection    | <a href="#">#17</a> | Give numbers of studies screened, assessed for eligibility,     | 8     |
| 20 |                    |                     | and included in the review, with reasons for exclusions at      |       |
| 21 |                    |                     | each stage, ideally with a <a href="#">flow diagram</a> .       |       |
| 22 |                    |                     |                                                                 |       |
| 23 |                    |                     |                                                                 |       |
| 24 | Study              | <a href="#">#18</a> | For each study, present characteristics for which data were     | N/A   |
| 25 | characteristics    |                     | extracted (e.g., study size, PICOS, follow-up period) and       |       |
| 26 |                    |                     | provide the citation.                                           |       |
| 27 |                    |                     |                                                                 |       |
| 28 |                    |                     |                                                                 |       |
| 29 |                    |                     |                                                                 |       |
| 30 | Risk of bias       | <a href="#">#19</a> | Present data on risk of bias of each study and, if available,   | 11-12 |
| 31 | within studies     |                     | any outcome-level assessment (see Item 12).                     |       |
| 32 |                    |                     |                                                                 |       |
| 33 |                    |                     |                                                                 |       |
| 34 | Results of         | <a href="#">#20</a> | For all outcomes considered (benefits and harms), present,      | 14-17 |
| 35 | individual studies |                     | for each study: (a) simple summary data for each                |       |
| 36 |                    |                     | intervention group and (b) effect estimates and confidence      |       |
| 37 |                    |                     | intervals, ideally with a forest plot.                          |       |
| 38 |                    |                     |                                                                 |       |
| 39 |                    |                     |                                                                 |       |
| 40 | Synthesis of       | <a href="#">#21</a> | Present the main results of the review. If meta-analyses are    | 14-17 |
| 41 | results            |                     | done, include for each, confidence intervals and measures       |       |
| 42 |                    |                     | of consistency.                                                 |       |
| 43 |                    |                     |                                                                 |       |
| 44 |                    |                     |                                                                 |       |
| 45 |                    |                     |                                                                 |       |
| 46 | Risk of bias       | <a href="#">#22</a> | Present results of any assessment of risk of bias across        | N/A   |
| 47 | across studies     |                     | studies (see Item 15).                                          |       |
| 48 |                    |                     |                                                                 |       |
| 49 |                    |                     |                                                                 |       |
| 50 | Additional         | <a href="#">#23</a> | Give results of additional analyses, if done (e.g., sensitivity | N/A   |
| 51 | analysis           |                     | or subgroup analyses, meta-regression [see Item 16]).           |       |
| 52 |                    |                     |                                                                 |       |
| 53 |                    |                     |                                                                 |       |
| 54 | <b>Discussion</b>  |                     |                                                                 |       |
| 55 |                    |                     |                                                                 |       |
| 56 | Summary of         | <a href="#">#24</a> | Summarize the main findings, including the strength of          | 18-20 |
| 57 | Evidence           |                     | evidence for each main outcome; consider their relevance        |       |
| 58 |                    |                     |                                                                 |       |
| 59 |                    |                     |                                                                 |       |
| 60 |                    |                     |                                                                 |       |

1 to key groups (e.g., health care providers, users, and policy  
2 makers

3  
4 **Limitations** [#25](#) Discuss limitations at study and outcome level (e.g., risk of 20-21  
5 bias), and at review level (e.g., incomplete retrieval of  
6 identified research, reporting bias).  
7

8  
9 **Conclusions** [#26](#) Provide a general interpretation of the results in the context 22  
10 of other evidence, and implications for future research.  
11

## 12 **Funding**

13  
14  
15 **Funding** [#27](#) Describe sources of funding or other support (e.g., supply of 23  
16 data) for the systematic review; role of funders for the  
17 systematic review.  
18  
19

20  
21 None The PRISMA checklist is distributed under the terms of the Creative Commons Attribution  
22 License CC-BY. This checklist can be completed online using <https://www.goodreports.org/>, a tool  
23 made by the [EQUATOR Network](#) in collaboration with [Penelope.ai](#)  
24  
25  
26  
27  
28  
29  
30  
31  
32  
33  
34  
35  
36  
37  
38  
39  
40  
41  
42  
43  
44  
45  
46  
47  
48  
49  
50  
51  
52  
53  
54  
55  
56  
57  
58  
59  
60

# BMJ Open

## Effectiveness of pre-anaesthetic assessment clinic: a systematic review of randomised and non-randomised prospective controlled studies

|                                 |                                                                                                                                                                                                                                                                                                                                                   |
|---------------------------------|---------------------------------------------------------------------------------------------------------------------------------------------------------------------------------------------------------------------------------------------------------------------------------------------------------------------------------------------------|
| Journal:                        | <i>BMJ Open</i>                                                                                                                                                                                                                                                                                                                                   |
| Manuscript ID                   | bmjopen-2021-054206.R1                                                                                                                                                                                                                                                                                                                            |
| Article Type:                   | Original research                                                                                                                                                                                                                                                                                                                                 |
| Date Submitted by the Author:   | 08-Dec-2021                                                                                                                                                                                                                                                                                                                                       |
| Complete List of Authors:       | Kristoffersen, Eirunn; University of Agder, Department of Health and Nursing Science<br>Opsal, Anne; University of Agder, Department of Health and Nursing Science<br>Tveit, Tor; University of Agder, Department of Health and Nursing Science<br>Berg , Rigmor C ; Norwegian Institute of Public Health<br>Fossum, Mariann; University of Agder |
| <b>Primary Subject Heading</b>: | Anaesthesia                                                                                                                                                                                                                                                                                                                                       |
| Secondary Subject Heading:      | Surgery, Nursing, Health services research                                                                                                                                                                                                                                                                                                        |
| Keywords:                       | Adult anaesthesia < ANAESTHETICS, Health & safety < HEALTH SERVICES ADMINISTRATION & MANAGEMENT, Quality in health care < HEALTH SERVICES ADMINISTRATION & MANAGEMENT, Adult surgery < SURGERY                                                                                                                                                    |
|                                 |                                                                                                                                                                                                                                                                                                                                                   |

SCHOLARONE™  
Manuscripts





I, the Submitting Author has the right to grant and does grant on behalf of all authors of the Work (as defined in the below author licence), an exclusive licence and/or a non-exclusive licence for contributions from authors who are: i) UK Crown employees; ii) where BMJ has agreed a CC-BY licence shall apply, and/or iii) in accordance with the terms applicable for US Federal Government officers or employees acting as part of their official duties; on a worldwide, perpetual, irrevocable, royalty-free basis to BMJ Publishing Group Ltd ("BMJ") its licensees and where the relevant Journal is co-owned by BMJ to the co-owners of the Journal, to publish the Work in this journal and any other BMJ products and to exploit all rights, as set out in our [licence](#).

The Submitting Author accepts and understands that any supply made under these terms is made by BMJ to the Submitting Author unless you are acting as an employee on behalf of your employer or a postgraduate student of an affiliated institution which is paying any applicable article publishing charge ("APC") for Open Access articles. Where the Submitting Author wishes to make the Work available on an Open Access basis (and intends to pay the relevant APC), the terms of reuse of such Open Access shall be governed by a Creative Commons licence – details of these licences and which [Creative Commons](#) licence will apply to this Work are set out in our licence referred to above.

Other than as permitted in any relevant BMJ Author's Self Archiving Policies, I confirm this Work has not been accepted for publication elsewhere, is not being considered for publication elsewhere and does not duplicate material already published. I confirm all authors consent to publication of this Work and authorise the granting of this licence.

1  
2  
3 1 **Effectiveness of pre-anaesthetic assessment clinic: a systematic review of randomised and**  
4  
5 2 **non-randomised prospective controlled studies**  
6  
7

8 3  
9  
10 4 Eirunn Wallevik Kristoffersen<sup>1,2</sup> \*, Anne Opsal<sup>1</sup>, Tor Oddbjørn Tveit<sup>1,2,3</sup>, Rigmor C Berg<sup>4,5</sup>,  
11  
12 5 Mariann Fossum<sup>1</sup>  
13  
14

15 6  
16  
17 7 <sup>1</sup>Department of Health and Nursing Science, University of Agder, Grimstad/Kristiansand,  
18  
19 8 Norway  
20  
21

22 9 <sup>2</sup>Department of Anaesthesiology and Intensive Care, Soerlandet Hospital, Kristiansand,  
23  
24 10 Norway  
25  
26

27 11 <sup>3</sup>Department of Technology and e-Health, Soerlandet Hospital, Kristiansand, Norway  
28  
29

30 12 <sup>4</sup> Department of Community Medicine, University of Tromsø, Tromsø, Norway  
31  
32

33 13 <sup>5</sup>Norwegian Institute of Public Health, Oslo, Norway  
34  
35

36 14  
37 15 \*Corresponding author:  
38

39 16 Eirunn Wallevik Kristoffersen  
40

41 17 Department of Health and Nursing Science, University of Agder, Grimstad/Kristiansand,  
42  
43 18 Norway  
44  
45

46 19 E-mail: eirunn.w.kristoffersen@uia.no  
47  
48

49 20  
50  
51 21 Word count: 3973  
52  
53

54 22  
55

56 23  
57  
58  
59  
60

1  
2  
3 24 **ABSTRACT**

4  
5 25 **Objectives:** The aim of this systematic review was to examine the effectiveness of pre-  
6  
7 26 anaesthetic assessment clinics (PACs) implemented to improve quality and patient safety in  
8  
9 27 perioperative care.

10  
11 28 **Design:** Systematic review.

12  
13 29 **Data sources:** The electronic databases CINAHL Plus with Full Text (EBSCOhost), Medline,  
14  
15 30 and Embase (OvidSP) were systematically searched from 1st April, 1996 to 4th February,  
16  
17 31 2021.

18  
19 32 **Eligibility criteria:** The main inclusion criterion was that the study, using empirical  
20  
21 33 quantitative methods, addressed the effectiveness of PACs.

22  
23 34 **Data extraction and synthesis:** Titles, abstracts, and full texts were screened by a team of  
24  
25 35 three authors. Risk of bias was assessed using the Joanna Briggs Institute critical appraisal  
26  
27 36 checklist for quasi-experimental studies. Data extraction was performed by one author and  
28  
29 37 checked by four other authors. Results were synthesised narratively owing to the  
30  
31 38 heterogeneity of the included studies.

32  
33 39 **Results:** Seven prospective controlled studies, on the effectiveness of PACs, were included.  
34  
35 40 Three studies reported a significant reduction in the length of the hospital stay, and two  
36  
37 41 studies reported a significant reduction in cancellation of surgery for medical reasons when  
38  
39 42 patients were seen in the PAC. In addition, the included studies presented mixed results  
40  
41 43 regarding anxiety in patients. Most studies had a high risk of bias.

42  
43 44 **Conclusion:** This systematic review demonstrated a reduction in the length of hospital stay  
44  
45 45 and cancellation of surgery when the patients had been assessed in the PAC. There is a need  
46  
47 46 for high-quality prospective studies to gain a deeper understanding of the effectiveness of  
48  
49 47 PACs.

50  
51 48 **PROSPERO registration number:** CRD42019137724

52  
53 49  
54  
55 50 **Keywords:** pre-anaesthetic assessment clinic, preoperative care, quality, safety, systematic  
56  
57 51 review

58  
59 52  
60 53  
54  
55  
56  
57  
58  
59  
60 57

## 58 **Strengths and Limitations of this study**

- 59 • An extensive database search was conducted with no limitations on outcomes and  
60 the type of pre-anaesthetic assessment clinic.
- 61 • Only randomised or non-randomised prospective controlled studies were included.
- 62 • The Joanna Briggs Institute Critical appraisal checklist for quasi-experimental studies  
63 was used.
- 64 • The included studies were heterogeneous and had high risk of bias, which is a major  
65 limitation of this review.

## 67 **INTRODUCTION**

68 Anaesthesia is crucial in surgery. However, it may activate physiological changes that  
69 increase morbidity and mortality, [1] depending on the patients' preoperative health status  
70 and age. [2] Hospitals treat patients with complex, comorbid healthcare problems  
71 undergoing progressively extensive surgeries and interventions. [3,4] To ensure the quality  
72 and safety of anaesthesia and surgery, precise knowledge of the clinical characteristics of  
73 patients undergoing surgery is critical to the perioperative treatment plan. [2] Over the past  
74 50 years, perioperative mortality, including anaesthesia-related mortality, has declined,  
75 which is significant in developed countries, [1,5] mainly due to new anaesthetics, improved  
76 monitoring equipment and training, availability of recovery rooms, and improved airway  
77 management. [4] However, an Australian study reported that 14% of anaesthetic-surgical  
78 complications and 39% of deaths attributed to anaesthesia were associated with insufficient  
79 and/or inadequate preoperative evaluation. [6] A Danish retrospective investigation showed  
80 that the deaths among patients undergoing surgery could be prevented by thorough  
81 preoperative evaluation, [7] indicating that risk factors are both patient-and surgery-related  
82 and linked to organisational structures. [8] Future efforts should improve preoperative

1  
2  
3 83 anaesthesia safety, [9] by improving planning and preparation for elective procedures and  
4  
5  
6 84 interventions.  
7  
8  
9 85 Today, an increasing number of pre-anaesthesia assessment clinics (PACs) support hospitals  
10  
11 86 internationally in handling the rising number of patients and complexity of surgical  
12  
13  
14 87 procedures. [10] The design of PACs differs critically based on location, organisational  
15  
16  
17 88 structure, timing, and patient groups. They primarily function as a service unit for surgeons,  
18  
19 89 patients, and the anaesthetic team. [11] The PAC consultation, by the anaesthesiologist,  
20  
21 90 anaesthesia nurse, or both, is a globally recognised evaluation method and optimises the  
22  
23  
24 91 patients' medical condition prior to surgery and anaesthesia. [2] Thus, it is essential for  
25  
26  
27 92 secure anaesthetic practice since it detects anaesthesia-related risk factors and high-risk  
28  
29 93 patients, improves patient outcomes, prepares the patient physically and psychologically for  
30  
31 94 anaesthesia, and ensures the patient's most favourable condition for surgery and  
32  
33  
34 95 anaesthesia. [12-14] This is primarily performed by interviewing and examining the patient,  
35  
36  
37 96 reviewing previous medical, surgical and anaesthesia issues, detailed description of current  
38  
39 97 medication, and provisions for obtaining and reviewing preoperative tests. [11] PACs also  
40  
41 98 lead to increased communication between healthcare providers and coordination with  
42  
43  
44 99 postoperative care. [15,16] Due to well-prepared patients and staff, several researchers  
45  
46 100 posit that with PAC, the number of surgical cancellations, length of hospital stay, and  
47  
48 101 mortality rate have reduced, and tests are minimised. [8,17,18] Others assert that patients  
49  
50  
51 102 feel less anxious regarding the subsequent anaesthetic and surgical processes and are highly  
52  
53 103 satisfied with the service with PAC consultations. [17,19,20]  
54  
55  
56 104 As Turunen *et al.* stated, research on PACs is scarce regarding costs, financial savings, the  
57  
58  
59 105 impact on patient safety and quality of care, accuracy of operative patients, and effect on  
60

1  
2  
3 106 preoperative nursing levels. [21] Survey results indicate that anaesthesiologists perceive day  
4  
5  
6 107 of surgery delays due to missing information as common, even with PAC consultations. [22]  
7  
8 108 This systematic review aimed to examine the effectiveness of PACs in improving quality and  
9  
10  
11 109 patient safety in preoperative care. Further, we aimed to determine the gaps in existing  
12  
13 110 knowledge for future research.

## 111 **METHODS**

112 Our systematic review followed the guidelines in the Cochrane Handbook for Systematic  
113 Reviews of Interventions [23] and was reported in accordance with the Preferred Reporting  
114 Items for Systematic Reviews and Meta-Analyses (PRISMA) guidelines. [24] The protocol was  
115 registered in PROSPERO: CRD42019137724. [25]

116 The two review questions were:

- 117 1. Is PAC effective in improving patient satisfaction and safety, while reducing anxiety?
- 118 2. Is PAC effective in reducing cancellation rate, cost, and improving efficiency?

### 119 **Search strategies**

120 We performed a scoping search in different databases to identify the key terms. [26,27] The  
121 final search was planned and conducted in close collaboration with a university librarian. On  
122 11th September, 2018 we searched CINAHL Plus with Full Text (EBSCOhost), Medline, and  
123 Embase (OvidSP), which was updated on 3th February 2020 and 4th February, 2021.

124 Considering the lack of subject headings (e.g., MeSH) for PAC, we combined text words such  
125 as preanaesthesia, nurse, surgery, anaesthesia, preoperative, assessment, measurement,  
126 evaluate, preadmission, centre, clinic, ward, unit, and outpatient. The searches are detailed  
127 in Appendix 1. The search mode in CINAHL was Boolean/Phase, which supports Boolean  
128 searching or exact phrase searching. For comprehensiveness, we used both the truncation

1  
2  
3 129 and proximity operators. We limited the search to 1996, the year one of the first known  
4  
5 130 articles in this area was published. [28] Complementary methods to identify studies included  
6  
7  
8 131 following up on citations via Scopus, scanning the reference lists of relevant papers and  
9  
10 132 included articles, and checking for relevant studies in clinical trials. [26]  
11  
12

### 13 133 **Eligibility criteria**

14  
15 134 The main inclusion criterion was that the study, using empirical quantitative methods,  
16  
17  
18 135 addressed the effectiveness of PACs. Specific eligibility criteria were: (a) published in English  
19  
20 136 or Scandinavian language, (b) scientific publication of original research, (c) reported the  
21  
22  
23 137 outcomes of PAC, (d) PAC consultation with the patient present, (e) randomised or non-  
24  
25 138 randomised prospective controlled studies, and (f) newly established PAC. We excluded: (a)  
26  
27  
28 139 editorials, discussions, and conference abstracts, (b) reviews, (c) instrument testing, (d)  
29  
30 140 studies on children, and (e) retrospective studies.  
31  
32

### 33 141 **Study selection**

34  
35 142 All references identified in the search were transferred to EndNoteX9, where the duplicates  
36  
37  
38 143 were removed. Subsequently, all unique references were transferred to the Covidence  
39  
40 144 screening tool. [29] Study eligibility was ascertained independently, first at the title and  
41  
42  
43 145 abstract level, and subsequently at the full text. Three of the authors screened all the  
44  
45 146 articles (EWK, AO, MF). Inclusion was determined by consensus, and disagreements were  
46  
47  
48 147 resolved by consulting RCB and TOT.  
49  
50

51 148

### 52 149 **Quality assessment**

53  
54 150 Risk of bias in studies were assessed using design specific checklists. Given the  
55  
56  
57 151 methodological similarity of the studies, only the Joanna Briggs Institute Critical appraisal  
58  
59 152 checklist for quasi-experimental studies was used. [30] Author EWK performed the risk of  
60

1  
2  
3 153 bias assessment, and RCB confirmed its accuracy. Disagreements were resolved through  
4  
5 154 discussion with MF and AO. Each of the nine checklist questions was answered no, yes,  
6  
7  
8 155 unclear (or not applicable).  
9

## 10 156 **Data extraction and analysis**

11  
12  
13 157 Author EWK extracted data from each study onto a pre-designed Excel spreadsheet. All the  
14  
15 158 authors confirmed the accuracy, consistency, and completeness of the extracted data that  
16  
17  
18 159 included publication details, study design, setting, and characteristics of the patients,  
19  
20 160 interventions, comparisons, and outcome (PICO). We requested information on the missing  
21  
22  
23 161 data; however, received no response from the authors. If the PICO elements were  
24  
25 162 sufficiently similar and statistical data available, we intended to conduct meta-analyses.  
26  
27  
28 163 However, the extracted data revealed substantial heterogeneity. Therefore, we performed  
29  
30 164 narrative synthesis, describing and comparing the main findings from the included studies,  
31  
32  
33 165 and discussing their methodological strengths and weaknesses.

## 34 35 166 **Patient and Public Involvement**

36  
37 167 Patients and/or the public were not involved in the design, conduct, reporting, or  
38  
39  
40 168 dissemination plans of this research. However, the project is initiated by health  
41  
42 169 professionals.  
43  
44

45 170

## 46 47 171 **RESULTS**

48  
49 172 Figure 1. provides details of the study selection process. A total of 2,981 records were  
50  
51  
52 173 identified in the final search (2021). After removing duplicates, we screened 2,058 records  
53  
54 174 based on the title and abstract; 179 records passed the full-text screening. We included  
55  
56  
57 175 seven studies that met the inclusion criteria.  
58

## 59 176 **Overall characteristics of the studies**



1  
2  
3 177 The seven studies are listed in Table 1. They were all in English and published between  
4  
5 178 2000–2017, with data collected in the years 1997–2015 (one study did not report data  
6  
7  
8 179 collection information). [31] Based on inclusion criteria, all were prospective controlled  
9  
10 180 studies; however, no RCTs were found. There was one controlled before-after study. [32]  
11  
12  
13 181 The rest six studies had control groups; assessments followed PAC implementation, without  
14  
15 182 baseline assessments. There were three 2-group non-parallel after-only studies, [33-35]  
16  
17  
18 183 and three 2-group parallel after-only studies [31]; one had a matched control group [36] and  
19  
20 184 one had three follow-up assessments of one arm. [37] One study had only cancellation rate  
21  
22  
23 185 as prospective data. [33] The studies included 77,411 patients.  
24  
25  
26  
27  
28  
29  
30  
31  
32  
33  
34  
35  
36  
37  
38  
39  
40  
41  
42  
43  
44  
45  
46  
47  
48  
49  
50  
51  
52  
53  
54  
55  
56  
57  
58  
59  
60

186 **Table 1: Description of included studies**

| Author, Year, Country                | Study design                         | Sampling time                                   | Population                                                                    | Intervention                                                               | Comparison                                    | Outcomes                                                                                                    |
|--------------------------------------|--------------------------------------|-------------------------------------------------|-------------------------------------------------------------------------------|----------------------------------------------------------------------------|-----------------------------------------------|-------------------------------------------------------------------------------------------------------------|
| Farasatkish,2009[34]<br>Iran         | 2-group<br>after study               | May 2007<br>through<br>August 2007              | N=1716, open-<br>heart surgery,<br>ASA class III-IV                           | Pre-anaesthesia<br>consultation clinic (3-<br>10 days before<br>surgery)   | Usual care (within<br>24 h of surgery)        | Cancellations                                                                                               |
| Kamal,2011[35]<br>England            | 2-group<br>after study               | April 2005<br>through<br>April 2009             | N=1445,<br>complex<br>elective<br>orthopaedic<br>surgery, ASA<br>class III-IV | Preoperative<br>anaesthetic<br>assessment clinic<br>(timing not stated)    | Usual care (day of<br>surgery)                | Admissions, length<br>of stay, mortality,<br>cost                                                           |
| Kamau,2017[32]<br>Kenya              | CBA                                  | August 2000,<br>April 2001,<br>November<br>2001 | N=51, elective<br>non-cardiac<br>surgery, ASA<br>class not stated             | Pre-anaesthesia clinic<br>consultation ( $\geq 48$ h<br>before surgery)    | Usual care (day<br>before surgery)            | Anxiety (STAI<br>score)                                                                                     |
| Klopfenstein,2000[31]<br>Switzerland | 2-group<br>after study<br>(parallel) | No data                                         | N=40, elective<br>endoscopic<br>urological<br>surgery, ASA<br>class I-III     | Pre-anaesthetic<br>consultation (1-2<br>weeks before surgery)              | Usual care (the<br>evening before<br>surgery) | Anxiety (MAACL,<br>VAS)                                                                                     |
| Lee,2012[36]<br>China                | 2-group<br>after study<br>(parallel) | March 2007<br>through<br>November<br>2009       | N=352, elective<br>surgery, ASA<br>class I-IV                                 | Anaesthesia<br>consultation clinic ( $\leq 3$<br>months before<br>surgery) | Usual care (the<br>evening before<br>surgery) | Quality of recovery<br>score, cost,<br>cancellations,<br>length of stay,<br>satisfaction,<br>anxiety (VAS), |

1  
2  
3  
4  
5  
6  
7  
8  
9  
10  
11  
12  
13  
14  
15  
16  
17  
18  
19  
20  
21  
22  
23  
24  
25  
26  
27  
28  
29  
30  
31  
32  
33  
34  
35  
36  
37  
38  
39  
40  
41  
42  
43  
44  
45  
46

|                                      |                                      |                                    |                                                          |                                                                                     |                                    |                                                                 |
|--------------------------------------|--------------------------------------|------------------------------------|----------------------------------------------------------|-------------------------------------------------------------------------------------|------------------------------------|-----------------------------------------------------------------|
| Mendes,2005[37]<br>Brazil            | 2-group<br>after study<br>(parallel) | April 2007<br>through<br>June 2007 | N=52254,<br>surgery, ASA<br>class not stated             | Preoperative<br>outpatient evaluation<br>clinic (timing not<br>stated)              | Usual care (timing<br>not stated)  | willingness to pay<br>(WTP)<br>Cancellations,<br>length of stay |
| van Klei,2002[33]<br>The Netherlands | 2-group<br>after study               | November<br>2012                   | N=21553,<br>elective<br>surgery, ASA<br>class not stated | Preoperative<br>outpatient evaluation<br>clinic (average 3<br>weeks before surgery) | Usual care (day<br>before surgery) | Cancellations                                                   |

187

188 ASA: American Society of Anesthesiology; CBA: controlled before-after; MAACL: Multiple Affect Adjective Check List; STAI: State-Trait Anxiety  
189 Inventory; VAS: visual analogue scale; WTP: willingness to pay

1  
2  
3 190 Considering the intervention, PACs in all studies comprised an outpatient service whereby  
4  
5 191 patients were examined for medical conditions important for anaesthesia and informed  
6  
7 192 regarding expectations on the day of surgery. Nevertheless, the terminology used for PACs  
8  
9  
10 193 varied, they served different surgical specialities, and conducted pre-anaesthesia  
11  
12 194 consultation from  $\geq 48$  h to  $\leq 3$  months before the surgery. The settings included university  
13  
14 195 hospital (n=3), [32,36,37] teaching hospital (n=1), [33] medical centre(n=1), [34] and general  
15  
16 196 hospital (n=1) [35]; one study did not specify the context.[31] The staff conducting the pre-  
17  
18 197 anaesthesia consultation also varied: in five studies, it was the anaesthesiologists, [31,33,35-  
19  
20 198 37] in the other studies it was (also) the orthopaedic senior house officer, [35] the  
21  
22 199 consultant or resident, [32] or the physician. [34] In three studies, nurses were part of the  
23  
24 200 team. [33,35,36] The comparison in all studies was usual care, which generally involved a  
25  
26 201 preoperative anaesthetic evaluation of the admitted patients the day before the surgery.  
27  
28  
29  
30  
31  
32  
33  
34

35 203 Of the 77,411 patients in the studies, 9,626 and 15,531 patients were in the intervention and  
36  
37 204 control groups, respectively. One study did not specify the number of patients in the  
38  
39 205 intervention and control groups, but only the total number of surgeries performed. [37] Five  
40  
41 206 studies reported data for sex, showing that 51% of the patients were women and 49% were  
42  
43 207 men (12,129 vs. 11,583). [31-34,36] There were more women than men in both the  
44  
45 208 intervention (4,345 vs. 4,134) and the control groups (7,784 vs. 7,449). Five studies reported  
46  
47 209 data for age showing that all the patients were over 20 years old [31-34,36] and four studies  
48  
49 210 had grouped within the American Society of Anesthesiology (ASA) category. [31,34-36]  
50  
51  
52  
53  
54  
55  
56

57 212 The patients were scheduled to undergo a variety of surgeries, including orthopaedic,  
58  
59 213 [32,33,35,36] urology, [31-33,36] general, [32,33,36] heart, [34] gynaecology/obstetrics,  
60

1  
2  
3 214 [32,33,36] vascular surgery, [33] ophthalmology, [33] maxillofacial/dental surgery,  
4  
5 215 [32,33]neurological surgery, [33] while one did not specify the type. [37] In five studies, the  
6  
7  
8 216 type of anaesthesia was not specified, [32-35,37] and two studies reported patients for  
9  
10 217 general and/or regional supplement. [31,36]

11  
12  
13 218

14  
15 219 The patients included had previous anaesthetic experience in one study, [31] previous and  
16  
17 220 no previous anaesthetic experience in another, [32] and five studies did not report this data.  
18  
19 221 [33-37] Limited background characteristics of the patients were reported in two studies.  
20  
21 222 [35,37] One stated that the patients included had ASA 3 or 4 and a body mass index >40;  
22  
23 223 however, no ASA number, sex, or age was reported. [35] Mendes *et al.* did not report any  
24  
25 224 background characteristics of the included patients. [37]

### 26 27 28 29 30 225 **Description of risk of bias in the studies**

31  
32 226 Figure 2. shows the results of the risk of bias assessment. In all seven included studies, the  
33  
34 227 cause and effect were clear. The majority of the studies measured outcomes similarly and  
35  
36 228 used appropriate statistical analyses. Several studies had limitations of follow-up and  
37  
38 229 similarity in care and participants. None of the patients had multiple pre-and post-  
39  
40 230 measurements.

### 41 42 43 44 231 **Outcomes of the included studies**

45  
46 232 The outcomes of the included studies are each described separately below.

#### 47 48 233 *Satisfaction*

49  
50 234 One study reported satisfaction as an outcome. [36] The summarised patient satisfaction  
51  
52 235 with the anaesthetic consultation score out of 100 showed that patients in the PAC group  
53  
54 236 were more satisfied (mean difference, 2.10%; 95% confidence interval [CI], 0.51–3.70%;  
55  
56 237  $p=0.01$ ). [36] There was no statistically significant difference between the two groups in  
57  
58  
59  
60

1  
2  
3 238 mean patient satisfaction with perioperative anaesthesia care score out of 5 after surgery  
4  
5 239 (mean difference 0.01%,  $p=0.94$ ). [36] The quality of recovery (QoR) measure is the patients'  
6  
7 240 quality of recovery score. [38] The mean QoR score (range, 0–18) following anaesthesia on  
8  
9 241 the first day after surgery was similar between the intervention ( $13.17\pm 2.73$ ) and control  
10  
11 242 ( $13.31\pm 2.65$ ) groups ( $p=0.67$ ). [36]

### 15 243 *Anxiety*

16  
17 244 Three studies reported anxiety. [31,32,36] Two studies reported the visual analogue scale  
18  
19 245 (VAS), one rated from zero (no anxiety) to ten (very high anxiety), [31] another used a 100  
20  
21 246 mm horizontal line with “not anxious at all” to “extremely anxious [36]” In one study, the  
22  
23 247 median VAS anxiety score was 3 (0–5) in the intervention group and 5 (2–8) in the control  
24  
25 248 group ( $p=0.0038$ ). [31] In another study, there were no significant differences between the  
26  
27 249 control and intervention groups for levels of anxiety (VAS), surgery (26 vs. 25, respectively,  
28  
29 250  $p=0.12$ ), and anaesthesia (20 vs. 19, respectively,  $p=0.60$ ). [36] The median Multiple Affect  
30  
31 251 Adjective Check List (MAACL) score, with possible range of scores 0–21 (higher scores  
32  
33 252 indicating greater levels of anxiety), was 3 (0–9) in the intervention group and 6.5 (2–12) in  
34  
35 253 the control group ( $p=0.0053$ ). [31] The differences in the State-Trait Anxiety Index (STAI)  
36  
37 254 score, which comprising 40 questions rated on a 4-point Likert scale, was 1.51, 95% CI: 1.02–  
38  
39 255 2.02%,  $p=0.0051$ ). [32] The results on anxiety in these two studies were significant. However,  
40  
41 256 Kamau *et al.* found no differences on examining anxiety and the influences of sex, duration  
42  
43 257 of hospital stay, and prior anaesthesia experience. [32]

### 51 258 *Mortality*

52  
53 259 One study reported the mortality rates. [35] Patients attending the High Dependency Unit  
54  
55 260 (HDU), Intensive Care Unit (ICU), and Post-anaesthesia Care Unit (PACU) following complex  
56  
57  
58  
59  
60

1  
2  
3 261 orthopaedic surgery had a significant reduction in mortality rate after being assessed in the  
4  
5 262 PAC, from 18 (6.1%) of 298 patients before to 14 (1.2%) of 1147 patients after  $p=0.001$ . [35]

7  
8 263 *Cancellation rate*

9  
10 264 Four studies reported reduced cancellation rates following the establishment of a PAC.  
11  
12 [33,34,36,37] One of the included studies had 316 (2.0%) cancellations for medical reasons  
13 265 before the introduction of PAC, and 79 (0.9%) after, and a difference of 1.02% (95% CI, 0.31–  
14  
15 266 1.31%). After adjustment, the odds ratio was 0.7 (95% CI, 0.5–0.9%). [33] The overall  
16  
17 267 cancellation of surgery reduced from 1027 (6.3%) to 393 (4.6%) following surgery, and a  
18  
19 268 difference of 0.9% (95% CI, 0.3–1.0%) when patients were assessed in PAC. [33] Mendes *et*  
20  
21 269 *al.* [37] found a decrease in overall cancellations from year 1 (39.3%) to year 4 (15.9%),  $p\leq$   
22  
23 270 0.05. There were 469 (number of cancellations)/10,639 (number of surgeries performed)  
24  
25 271 due to medical reasons in the first year of this study. The following year, a considerable  
26  
27 272 increase above the baseline in the intervention group was observed, followed by a  
28  
29 273 progressive decrease in the last year with 391 (number of cancellations)/10397 (number of  
30  
31 274 surgeries performed). [37] Farasatkish *et al.* reported that of the 1,716 patients studied, 15.1  
32  
33 275 % cancelled in the two groups. The cancellation rates in the control and intervention groups  
34  
35 276 were 146/866 (16.8%) and 113/850 (13.29%) ( $p=0.046$ ), respectively. The most common  
36  
37 277 reason for cancellation was incomplete medical work-up; 51/146 (35%) in the control group  
38  
39 278 and 32/113 (28%) in the intervention group ( $p=0.03$ ). [34] Lee *et al.* found similar rates for  
40  
41 279 surgery being cancelled on the scheduled date for the intervention group compared to the  
42  
43 280 control group (2.3% vs. 3.4%,  $p=0.75$ ). [36]

44  
45 282

46  
47 283 *Costs and willingness to pay*

1  
2  
3 284 Two studies reported the costs. [35,36] One study reported a total saving of £ 486.62 per  
4  
5 285 patient after establishing a PAC. [35] Another reported a significantly lower preoperative  
6  
7 286 cost per patient in the intervention group compared to the control group (mean difference,  
8  
9 \$ 463; 95% CI, -\$648 to -\$278 per patient,  $p < 0.01$ ). [36] However, the mean difference in the  
10  
11 287 total perioperative treatment cost was not significant, even after adjusting for cancellation  
12  
13 288 on the day of surgery costs. [36] The intervention group patients were willing to pay (WTP)  
14  
15 289 significantly more than the median WTP (US \$13) for a clinic consultation at the PAC than  
16  
17 290 the control group. [36]  
18  
19  
20  
21  
22

### 23 292 *Length of stay*

24  
25 293 The length of stay was reported in three studies. [35-37] Mendes *et al.* [37] found a  
26  
27 294 significant decrease in mean hospital stay of patients from 6.2 to 5.0 days ( $p \leq 0.001$ ) during  
28  
29 the four years of this study. Kamal *et al.* [35] found a significant reduction in the length of  
30  
31 295 stay in the high dependency unit from 2.1 days to 1.6 d ( $p = 0.01$ ), and in the intensive care  
32  
33 296 unit from 2.3 days to 1.9 days ( $p = 0.01$ ). In the last study, no significant changes were found  
34  
35 297 in the median duration of postoperative stay between the intervention and control groups.  
36  
37 298 [36]  
38  
39  
40  
41

### 42 300 *Organisation planning and efficiency*

43  
44 301 Organisation planning and efficiency have been reported in two studies. [35,37] One study  
45  
46 302 found statistically significant changes in the reduction of unplanned admissions to the PACU  
47  
48 303 (65/298 [22%], 111/1147 [10%],  $p = 0.001$ ), ICU (4/298 [1.3%], 4/1147 [0.4%],  $p = 0.01$ ), and  
49  
50 304 HDU (4/298 [1.34%], 20/1147 [1.7%],  $p = 0.01$ ) after implementing a PAC. [35] The planned  
51  
52 305 admissions in the ICU (4/298 [1.3%], 18/1147 [1.6%],  $p = 0.01$ ), and HDU (14/298 [4.7%],  
53  
54 306 85/1147 [7.4%],  $p = 0.1$ ) increased after implementing a PAC. [35] The number of PAC  
55  
56 307 evaluations increased from year 14,704 to year 413,990 ( $p \leq 0.001$ ). [37] The number of  
57  
58  
59  
60



1  
2  
3 308 outpatient procedures increased from 2,170 (year 1) to 1,943 (year 4) ( $p \leq 0.001$ ), and the  
4  
5 309 inpatient procedures decreased from 9,556 (year 1) to 8,449 (year 4), ( $p \leq 0.001$ ). [37]  
6  
7

8 310  
9 311 **DISCUSSION**

10  
11 312 This systematic review summarises the effectiveness of PACs in improving quality and  
12  
13 313 patient safety in general hospitals and determines the gaps in existing knowledge for future  
14  
15 314 research. Seven studies met the inclusion criteria. Herein, we present the main results and  
16  
17 315 infer the implications for research and practice.  
18  
19  
20  
21 316

22  
23 317 Cancellation on the day of surgery has undesirable effects on both the patients and the  
24  
25 318 hospital system. [14] Studies have found that late patient-related cancellations could totally  
26  
27 319 or partially be prevented, [39] if addressed during preoperative evaluations. [14,17] This is  
28  
29 320 confirmed by only three studies in this systematic review that found a reduction in surgery  
30  
31 321 cancellation after implementing a PAC. [33,34,37] However, Lee *et al.* found no significant  
32  
33 322 changes between the intervention and control groups. [36] Mendes *et al.* found that the  
34  
35 323 number of cancellations for medical reasons after PAC implementation decreased in the first  
36  
37 324 year of implementation. In the second and third years, they were high before the number  
38  
39 325 dropped to below baseline. [37] These conflicting findings might show that hospitals operate  
40  
41 326 in specific contexts, with unique populations, processes, and microsystems, encountering  
42  
43 327 unique obstacles, making implementation difficult. Patient-focused interventions should  
44  
45 328 consider barriers, facilitators, and interrelationships between systems, staff, and  
46  
47 329 interventions to increase the likelihood of sustainable success. [40] Addition, Kamau *et al.*  
48  
49 330 indicated that PACs lead to more planned admissions to the ICU, HDU, and PACU, which is  
50  
51 331 more predictable for patients, staff, and administrations. [32]  
52  
53  
54  
55  
56  
57  
58  
59  
60

1  
2  
3 332  
4 333 Another finding of this systematic review was a significant reduction in the length of hospital  
5  
6  
7 334 stay following patients' examination in a PAC; however, a small number of studies with low  
8  
9 335 quality were considered. Nevertheless, similar results were found in another systematic  
10  
11 336 review claiming that perioperative systems support hospitals addressing the expected  
12  
13  
14 337 growth in the number and complexity of surgical procedures. [17] When patients are  
15  
16 338 examined in the PAC and well-prepared with information, consultations, and tests, they  
17  
18 339 need not be hospitalised until the day of surgery. A survey on operated patients showed that  
19  
20  
21 340 given a choice, 75% do not wish admission to the hospital until the day of operation; a major  
22  
23  
24 341 reason being shorter hospital stay. [41] However, an updated systematic review on the  
25  
26 342 effectiveness of nurse-led preoperative assessment services for elective surgery found that  
27  
28  
29 343 the included articles demonstrated a reduced length of stay; these studies had low  
30  
31 344 methodological quality, and therefore, the authors could not conclude that this service leads  
32  
33  
34 345 to reduced length of hospital stay. [18]

35  
36 346  
37  
38 347 The evidence from our systematic review is insufficient to conclude whether patients have  
39  
40  
41 348 reduced anxiety due to PAC. The included studies used different instruments for measuring  
42  
43  
44 349 anxiety levels, and the results could not be pooled. [42]

45  
46 350  
47  
48 351 A major purpose of establishing a PAC in a hospital is to better prepare the patients for the  
49  
50  
51 352 anticipated surgery. Healthcare professionals and policymakers are exploring strategies to  
52  
53  
54 353 reduce unnecessary investigations without compromising quality and patient safety. [43]  
55  
56 354 Translation of evidence-based interventions into hospital systems can provide instant and  
57  
58 355 substantial benefits to patients care and outcomes. However, existing literature describes  
59  
60

1  
2  
3 356 barriers and facilitators to implementation related to the system, staff and the intervention.  
4  
5  
6 357 [40] "Routine preoperative laboratory tests" on relatively healthy patients are not  
7  
8 358 recommended from the American Society of Anesthesiologist (ASA), [16] and the National  
9  
10 359 Institute of Health and Care Excellence (NICE). [44] Instead, they encourage for patient and  
11  
12 360 surgery- specific investigations. This recommendation is not always implemented in hospital  
13  
14 361 protocols or practiced for several reasons. Furthermore, an observational study found that  
15  
16 362 routine pre-operative testing to predict abnormalities found at least one abnormal test  
17  
18 363 results in most of the relatively healthy patients. Only 0.67% of the abnormalities had  
19  
20 364 significant impact on changing the perioperative management. [45] Blitz *et al.* argued that  
21  
22 365 PACs should focus on early patient engagement strategies, interdisciplinary team  
23  
24 366 communication, detailed perioperative care plans, and patient documentation using  
25  
26 367 electronic health record that should be open for review by the perioperative team to  
27  
28 368 preserve patient information and safety. [15] Furthermore, a previous study pointed out  
29  
30 369 that the risk factors are not only patient-related but also organisation-related, [8] and that  
31  
32 370 some hospitals have perioperative care teams that are better at identifying and relieving  
33  
34 371 perioperative complications. [46,47] This suggests that the value of PACs lies in their ability  
35  
36 372 to improve the quality of the perioperative process by designing a more robust system for  
37  
38 373 preoperative assessment and preparation. [15] A Danish study found that deaths attributed  
39  
40 374 to anaesthesia were associated with inadequate preoperative evaluation. [7] However, the  
41  
42 375 assessment of PAC was significantly associated with reduced mortality following complex  
43  
44 376 orthopaedic surgery in only one study in this systematic review. [35] Retrospective studies  
45  
46 377 have reported similar results, but with different surgeries. [15,48]  
47  
48 378  
49  
50 379  
51  
52  
53  
54  
55  
56  
57  
58  
59  
60

1  
2  
3 380 **Strengths and limitations of the study**  
4

5 381 The review was performed in duplicate or independently by two researchers, and consensus  
6  
7  
8 382 was reached through discussion. However, grey literature, such as government and  
9  
10 383 institutional documents, were excluded and might be a limitation of this study. Since  
11  
12 384 organisation of healthcare systems vary in countries, the type of staff who performed the  
13  
14 385 patient's preoperative assessment was not considered an inclusion criterion. The European  
15  
16 386 Society of Anaesthesiology guidelines recommend that anaesthesiologists complete the  
17  
18 387 preoperative assessment, while trained nurses or anaesthesia trainees perform the  
19  
20 388 screening. [8] A preoperative evaluation performed by an internist was associated with  
21  
22 389 increased length of stay and increased postoperative mortality. [49] This systematic review  
23  
24 390 results were possibly affected by the heterogeneity in the types of staff performing the  
25  
26 391 preoperative assessment.  
27  
28  
29  
30  
31

32 392  
33  
34 393 We exclusively included studies with high internal validity. Therefore, we excluded several  
35  
36 394 retrospective studies. Nonetheless, remaining studies' risk of bias was fairly high, and were  
37  
38 395 heterogeneous and meta-analyses were not statistically appropriate. [27] The included  
39  
40 396 studies' designs could not rule out selection bias and confounding, and the strength of the  
41  
42 397 evidence should be assessed cautiously. Many studies did not make adjustments for several  
43  
44 398 confounders, which could be responsible for the observed effects. Several studies lacked  
45  
46 399 descriptions of the methods used and the patients included, lowering transparency. It is not  
47  
48 400 very reassuring that many such studies were unable to deliver more thorough evidence to  
49  
50 401 guide practice and should be assessed cautiously. The results are relevant to health care  
51  
52 402 services, focusing on the well-being and safety of the patients.  
53  
54  
55  
56  
57  
58  
59  
60

## 404 **Implications for future research and practice**

405 This systematic review identified the ambiguity in the PAC interventions offered to the  
406 intervention group. In many studies, it was evident that the methods used lacked clarity, and  
407 high-quality research is needed in this field. The studies included in this review did not  
408 contain any results of earlier surgical room entry time for patients assessed in PACs, [50,51]  
409 reduced preoperative tests, such as blood tests, in patients before surgery after attending  
410 the PAC, similar to previous retrospective studies. [28,52]

411 Other implications for future research might include the organisation structure of different  
412 PACs and their functioning. Additionally, the tests that should be part of assessment at  
413 PACs should be investigated. The use of technology, such as streaming services, facilitates  
414 different patient groups and might become crucial for reducing human contact and spread  
415 of the virus in context of Covid-19.

## 416 **CONCLUSION**

417 PAC use has reduced the length of stay and cancellation rate at hospitals. However, the  
418 effectiveness of PAC, the major review question, remains unclear, and requires further  
419 research. There is a demand for high-quality studies capturing robust data describing the  
420 quality of care and clinical outcomes for patients requiring anaesthesia. This requires  
421 increased focus and funding for this specific area of health services research and could,  
422 therefore, lead to implementations of PACs in health care services and improve patient  
423 safety and perioperative care.

## 424 **Acknowledgement**

425 We thank the librarian Ellen Sejerstedt, University of Agder, Kristiansand, for helping with  
426 the search strategy and removal of duplicates.

## 427 **Competing Interests**

1  
2  
3 428 The authors declare that they have no conflict of interest.  
4

5 429 **Data sharing statement**  
6

7  
8 430 All data relevant to the study are included within the article or have been uploaded within  
9  
10 431 supplemental files.  
11

12  
13 432 **Funding**  
14

15 433 This research received no specific grant from any funding agency in the public, commercial  
16  
17 434 or not-for-profit sectors.  
18

19  
20 435 **Author contributions**  
21

22 436 EWK, MF, AO and TOT: Study design  
23

24  
25 437 EWK, MF, AO: Search and screening of the articles  
26

27 438 EWK: Data extraction  
28

29  
30 439 MF, AO, RCB and TOT: Control of data extraction  
31

32 440 EWK, MF, AO and RCB: Quality assessment of the included articles  
33

34  
35 441 EWK: Drafting of the manuscript  
36

37 442 MF, AO, RCB, and TOT: Contribution to and review of the final version of the manuscript  
38

39  
40 443 MF, AO, RCB and TOT: Supervised the study  
41

42 444 **References**  
43

- 44  
45 445 1 Braz LG, Braz DG, Da Cruz DS, et al. Mortality in anesthesia: a systematic review.  
46 446 *Clinics (Sao Paulo)* 2009;**64**:999–1006. doi: [10.1590/S1807-59322009001000011](https://doi.org/10.1590/S1807-59322009001000011).  
47 447 2 Santos ML, Novaes CO, Iglesias AC. Epidemiological profile of patients seen in the  
48 448 pre-anesthetic assessment clinic of a university hospital. *Rev Bras Anesthesiol*  
49 449 2017;**67**:457–67. doi: [doi.org/10.1016/j.bjan.2016.06.002](https://doi.org/10.1016/j.bjan.2016.06.002).  
50  
51 450 3 Amaya F, Shimamoto S, Matsuda M, et al. Preoperative anesthesia clinic in Japan: a  
52 451 nationwide survey of the current practice of preoperative anesthesia assessment. *J*  
53 452 *Anesth* 2015;**29**:175–9. doi: [10.1007/s00540-014-1918-3](https://doi.org/10.1007/s00540-014-1918-3) [Published online first:  
54 453 2014/09/30].  
55  
56 454 4 Whitaker DK, Brattebø G, Smith AF, et al. The Helsinki Declaration on Patient Safety  
57 455 in anaesthesiology: putting words into practice. *Best Pract Res Clin Anaesthesiol*  
58 456 2011;**25**:277–90. doi: [10.1016/j.bpa.2011.02.001](https://doi.org/10.1016/j.bpa.2011.02.001).  
59  
60

- 1  
2  
3 457 5 Bainbridge D, Martin J, Arango M, et al. Perioperative and anaesthetic-related  
4 458 mortality in developed and developing countries: a systematic review and meta-  
5 459 analysis. *Lancet* 2012;**380**:1075–81. doi: [10.1016/S0140-6736\(12\)60990-8](https://doi.org/10.1016/S0140-6736(12)60990-8).  
6 460 6 Kluger MT, Tham EJ, Coleman NA, et al. Inadequate pre-operative evaluation and  
7 461 preparation: a review of 197 reports from the Australian Incident Monitoring Study.  
8 462 *Anaesthesia* 2000;**55**:1173–78. doi: [10.1046/j.1365-2044.2000.01725.x](https://doi.org/10.1046/j.1365-2044.2000.01725.x).  
9 463 7 Hove LD, Steinmetz J, Christoffersen JK, et al. Analysis of deaths related to anesthesia  
10 464 in the period 1996–2004 from closed claims registered by the Danish Patient  
11 465 Insurance Association. *Anesthesiology* 2007;**106**:675–80. doi:  
12 466 [10.1097/01.anes.0000264749.86145.e5](https://doi.org/10.1097/01.anes.0000264749.86145.e5) [Published online first: 2007/04/07].  
13 467 8 De Hert S, Imberger G, Carlisle J, et al. Preoperative evaluation of the adult patient  
14 468 undergoing non-cardiac surgery: guidelines from the European Society of  
15 469 Anaesthesiology. *Eur J Anaesthesiol* 2011;**28**:684–722. doi:  
16 470 [10.1097/EJA.0b013e3283499e3b](https://doi.org/10.1097/EJA.0b013e3283499e3b).  
17 471 9 Haller G, Laroche T, Clergue F. Morbidity in anaesthesia: today and tomorrow. *Best*  
18 472 *Pract Res Clin Anaesthesiol* 2011;**25**:123–32. doi: [10.1016/j.bpa.2011.02.008](https://doi.org/10.1016/j.bpa.2011.02.008)  
19 473 [Published online first: 2011/05/10].  
20 474 10 Chan FW, Wong F, Cheung YS, et al. Utility of a preoperative assessment clinic in a  
21 475 tertiary care hospital. *Hong Kong Med J* 2011;**17**:441–5 [Published online first:  
22 476 2011/12/08].  
23 477 11 Gupta A, Gupta N. Setting up and functioning of a preanaesthetic clinic. *Indian J*  
24 478 *Anaesth* 2010;**54**:504–7. doi: [10.4103/0019-5049.72638](https://doi.org/10.4103/0019-5049.72638).  
25 479 12 Hariharan S, Chen D, Merritt-Charles L. Evaluation of the utilization of the  
26 480 preanaesthetic clinics in a university teaching hospital. *BMC Health Serv Res*  
27 481 2006;**6**:59. doi: [10.1186/1472-6963-6-59](https://doi.org/10.1186/1472-6963-6-59) [Published online first: 2006/05/25].  
28 482 13 Schmiesing CA, Brodsky JB. The preoperative anesthesia evaluation. *Thorac Surg Clin*  
29 483 2005;**15**:305–15. doi: [10.1016/j.thorsurg.2005.02.006](https://doi.org/10.1016/j.thorsurg.2005.02.006).  
30 484 14 Lew E, Pavlin DJ, Amundsen L. Outpatient preanaesthesia evaluation clinics.  
31 485 *Singapore Med J* 2004;**45**:509–16.  
32 486 15 Blitz JD, Kendale SM, Jain SK, et al. Preoperative evaluation clinic visit is associated  
33 487 with decreased risk of in-hospital postoperative mortality. *Anesthesiology*  
34 488 2016;**125**:280–94. doi: [10.1097/ALN.0000000000001193](https://doi.org/10.1097/ALN.0000000000001193) [Published online first:  
35 489 2016/07/21].  
36 490 16 Committee on Standards and Practice Parameters, Apfelbaum JL, Connis RT et al.  
37 491 Practice advisory for preanesthesia evaluation: an updated report by the American  
38 492 Society of Anesthesiologists Task Force on Preanesthesia Evaluation. *Anesthesiology*  
39 493 2012;**116**:522–38. doi: [10.1097/ALN.0b013e31823c1067](https://doi.org/10.1097/ALN.0b013e31823c1067).  
40 494 17 Lee A, Kerridge RK, Chui PT, et al. Perioperative Systems as a quality model of  
41 495 perioperative medicine and surgical care. *Health Policy* 2011;**102**:214–22. doi:  
42 496 [10.1016/j.healthpol.2011.05.009](https://doi.org/10.1016/j.healthpol.2011.05.009) [Published online first: 2011/06/18].  
43 497 18 Hines S, Munday J, Kynoch K. Effectiveness of nurse-led preoperative assessment  
44 498 services for elective surgery: a systematic review update. *JBI Database Syst Rev*  
45 499 *Implement Rep* 2015;**13**:279–317. doi: [10.11124/jbisrir-2015-1996](https://doi.org/10.11124/jbisrir-2015-1996).  
46 500 19 Delaney D, Bayley EW, Olszewsky P, et al. Parental satisfaction with pediatric  
47 501 preoperative assessment and education in a presurgical Care Center. *J Perianesth*  
48 502 *Nurs* 2015;**30**:290–300. doi: [10.1016/j.jopan.2014.04.004](https://doi.org/10.1016/j.jopan.2014.04.004).  
49  
50  
51  
52  
53  
54  
55  
56  
57  
58  
59  
60

- 1  
2  
3 503 20 Davidson S, McKendrick D, French T. Preassessment clinic interview and patient  
4 504 anxiety. *Saudi J Anaesth* 2016;**10**:402–08. doi: [10.4103/1658-354X.177339](https://doi.org/10.4103/1658-354X.177339).  
5 505 21 Turunen E, Miettinen M, Setälä L, et al. The impact of a structured preoperative  
6 506 protocol on day of surgery cancellations. *J Clin Nurs* 2018;**27**:288–305. doi:  
7 507 [10.1111/jocn.13896](https://doi.org/10.1111/jocn.13896).  
8 508 22 Holt NF, Silverman DG, Prasad R, et al. Preanesthesia clinics, information  
9 509 management, and operating room delays: results of a survey of practicing  
10 510 anesthesiologists. *Anesth Analg* 2007;**104**:615–18. doi:  
11 511 [10.1213/01.ane.0000255253.62668.3a](https://doi.org/10.1213/01.ane.0000255253.62668.3a).  
12 512 23 <http://www.training.cochrane.org/handbook> (Accessed 08/12/2018), 2019 updated  
13 513 July 2019.  
14 514 24 Moher D, Liberati A, Tetzlaff J, et al. Preferred Reporting Items for Systematic  
15 515 Reviews and Meta-Analyses: the PRISMA statement. *BMJ* 2009;**339**:b2535. doi:  
16 516 [10.1136/bmj.b2535](https://doi.org/10.1136/bmj.b2535).  
17 517 25 Kristoffersen EW, Opsal A, Tveit TO, et al. The effect of preanaesthetic assessment  
18 518 clinic: a systematic review of randomised and non-randomised prospective  
19 519 controlled studie. *Prospero* 2019;CRD42019137724.  
20 520 26 Booth A, Sutton A, Papaioannou D. Systematic approaches to a successful literature  
21 521 review. *Los Angeles*. California: Sage 2016.  
22 522 27 Møller AM, Myles PS. What makes a good systematic review and meta-analysis? *Br J*  
23 523 *Anaesth* 2016;**117**:428–30. doi: [10.1093/bja/aew264](https://doi.org/10.1093/bja/aew264).  
24 524 28 Fischer SP. Development and effectiveness of an anesthesia preoperative evaluation  
25 525 clinic in a teaching hospital. *Anesthesiology* 1996;**85**:196–206. doi:  
26 526 [10.1097/00000542-199607000-00025](https://doi.org/10.1097/00000542-199607000-00025) [Published online first: 1996/07/01].  
27 527 29 <https://www.covidence.org/reviews/active> (Accessed 29/09/2018).  
28 528 30 Tufanaru C, Munn Z, Aromataris E, et al. Systematic review of effectiveness. JBI  
29 529 Manual for evidence synthesis. In: Aromataris E, Munn Z, eds.: *JBI Manual for*  
30 530 *evidence synthesis* 2020.  
31 531 31 Klopfenstein CE, Forster A, Van Gessel E. Anesthetic assessment in an outpatient  
32 532 consultation clinic reduces preoperative anxiety. *Can J Anaesth* 2000;**47**:511–5. doi:  
33 533 [10.1007/BF03018941](https://doi.org/10.1007/BF03018941) [Published online first: 2000/06/30].  
34 534 32 Kamau A, Mung'ayi V, Yonga G. The effect of a preanaesthesia clinic consultation on  
35 535 adult patient anxiety at a tertiary hospital in Kenya: a cohort study. *Afr Health Sci*  
36 536 2017;**17**:138–46. doi: [10.4314/ahs.v17i1.18](https://doi.org/10.4314/ahs.v17i1.18) [Published online first: 2017/10/14].  
37 537 33 van Klei WA, Moons KG, Rutten CL, et al. The effect of outpatient preoperative  
38 538 evaluation of hospital inpatients on cancellation of surgery and length of hospital  
39 539 stay. *Anesth Analg* 2002;**94**:644–9; table of contents. doi: [10.1097/00000539-](https://doi.org/10.1097/00000539-200203000-00030)  
40 540 [200203000-00030](https://doi.org/10.1097/00000539-200203000-00030) [Published online first: 2002/02/28].  
41 541 34 Farasatkish R, Aghdaii N, Azarfarin R, et al. Can preoperative anesthesia consultation  
42 542 clinic help to reduce operating room cancellation rate on the day of surgery? *Rawal*  
43 543 *Med J* 2009;**34**:26–8.  
44 544 35 Kamal T, Conway RM, Littlejohn I, et al. The role of a multidisciplinary pre-assessment  
45 545 clinic in reducing mortality after complex orthopaedic surgery. *Ann R Coll Surg Engl*  
46 546 2011;**93**:149–51. doi: [10.1308/003588411X561026](https://doi.org/10.1308/003588411X561026).  
47 547 36 Lee A, Chui PT, Chiu CH, et al. The cost-effectiveness of an outpatient anesthesia  
48 548 consultation clinic before surgery: a matched Hong Kong cohort study. *Perioper Med*  
49 549 *(Lond)* 2012;**1**:3. doi: [10.1186/2047-0525-1-3](https://doi.org/10.1186/2047-0525-1-3) [Published online first: 2012/01/01].



1  
2  
3  
4  
5  
6  
7  
8  
9  
10  
11  
12  
13  
14  
15  
16  
17  
18  
19  
20  
21  
22  
23  
24  
25  
26  
27  
28  
29  
30  
31  
32  
33  
34  
35  
36  
37  
38  
39  
40  
41  
42  
43  
44  
45  
46  
47  
48  
49  
50  
51  
52  
53  
54  
55  
56  
57  
58  
59  
60

- 550 37 Mendes FF, Mathias LA, Duval Neto GF, et al. Impact of preoperative outpatient  
551 evaluation clinic on performance indicators. *Rev Bras anesthesiol* 2005;**55**:175–87. doi:  
552 [10.1590/S0034-70942005000200004](https://doi.org/10.1590/S0034-70942005000200004).
- 553 38 Myles PS, Hunt JO, Nightingale CE, et al. Development and psychometric testing of a  
554 quality of recovery score after general anesthesia and surgery in adults. *Anesth Analg*  
555 1999;**88**:83–90. doi: [10.1097/0000539-199901000-00016](https://doi.org/10.1097/0000539-199901000-00016) [Published online first:  
556 1999/01/23].
- 557 39 Hänninen-Khoda L, Koljonen V, Ylä-Kotola T. Patient-related reasons for late surgery  
558 cancellations in a plastic and reconstructive surgery department. *JPRAS Open*  
559 2018;**18**:38–48. doi: [10.1016/j.jpra.2018.08.002](https://doi.org/10.1016/j.jpra.2018.08.002).
- 560 40 Geerligs L, Rankin NM, Shepherd HL, et al. Hospital-based interventions: a systematic  
561 review of staff-reported barriers and facilitators to implementation processes.  
562 *Implement Sci* 2018;**13**:36. doi: [10.1186/s13012-018-0726-9](https://doi.org/10.1186/s13012-018-0726-9).
- 563 41 Harries RL, Bradshaw CA, Jones EA, et al. To admit or not to admit on the morning of  
564 surgery: patients' perspectives on day of surgery admission. *J Perioper Pract*  
565 2013;**23**:56–8. doi: [10.1177/175045891302300304](https://doi.org/10.1177/175045891302300304).
- 566 42 Mitchell M. Anaesthesia type, gender and anxiety. *J Perioper Pract* 2013;**23**:41–7. doi:  
567 [10.1177/175045891302300301](https://doi.org/10.1177/175045891302300301) [Published online first: 2013/04/17].
- 568 43 Karim HMR, Singha SK, Neema PK, et al. Information technology-based joint  
569 preoperative assessment, risk stratification and its impact on patient management,  
570 perioperative outcome, and cost 2021;**9**:e130. doi: [10.15190/d.2020.9](https://doi.org/10.15190/d.2020.9).
- 571 44 *National guideline C. National Institute for Health and Care Excellence: clinical*  
572 *guidelines. Preoperative tests (update): routine preoperative tests for elective*  
573 *surgery*. London: National Institute for Health and Care Excellence. UK 2016.
- 574 45 Reazaul Karim HM, Prakash A, Sahoo SK, et al. Abnormal routine pre-operative test  
575 results and their impact on anaesthetic management: an observational study. *Indian*  
576 *J Anaesth* 2018;**62**:23–8. doi: [10.4103/ija.IJA\\_223\\_17](https://doi.org/10.4103/ija.IJA_223_17).
- 577 46 Savoldelli GL. Perioperative care is a hazardous business: let's make it safer! *Trends*  
578 *Anaesth Crit Care* 2016;**7–8**:3–4. doi: [10.1016/j.tacc.2016.05.003](https://doi.org/10.1016/j.tacc.2016.05.003).
- 579 47 Pearse RM, Moreno RP, Bauer P, et al. Mortality after surgery in Europe: a 7 day  
580 cohort study. *Lancet* 2012;**380**:1059–65. doi: [10.1016/S0140-6736\(12\)61148-9](https://doi.org/10.1016/S0140-6736(12)61148-9).
- 581 48 Cantlay KL, Baker S, Parry A, et al. The impact of a consultant anaesthetist led pre-  
582 operative assessment clinic on patients undergoing major vascular surgery.  
583 *Anaesthesia* 2006;**61**:234–9. doi: [10.1111/j.1365-2044.2005.04514.x](https://doi.org/10.1111/j.1365-2044.2005.04514.x) [Published  
584 online first: 2006/02/17].
- 585 49 Wijeyundera DN, Austin PC, Beattie WS, et al. Outcomes and processes of care  
586 related to preoperative medical consultation. *Arch Intern Med* 2010;**170**:1365–74.  
587 doi: [10.1001/archinternmed.2010.204](https://doi.org/10.1001/archinternmed.2010.204).
- 588 50 Ferschl MB, Tung A, Sweitzer BB, et al. Preoperative clinic visits reduce operating  
589 room cancellations and delays. *Anesthesiology* 2005;**103**:855–59. doi:  
590 [10.1097/00000542-200510000-00025](https://doi.org/10.1097/00000542-200510000-00025).
- 591 51 Correll DJ, Bader AM, Hull MW, et al. Value of preoperative clinic visits in identifying  
592 issues with potential impact on operating room efficiency. *Anesthesiology*  
593 2006;**105**:1254–9; discussion 6A. doi: [10.1097/00000542-200612000-00026](https://doi.org/10.1097/00000542-200612000-00026)  
594 [Published online first: 2006/11/24].
- 595 52 Power LM, Thackray NM. Reduction of preoperative investigations with the  
596 introduction of an anaesthetist-led preoperative assessment clinic. *Anaesth Intensive*

1  
2  
3 597 *Care* 1999;**27**:481–8. doi: [10.1177/0310057X9902700508](https://doi.org/10.1177/0310057X9902700508) [Published online first:  
4 598 1999/10/16].  
5 599

6 599  
7 600 **Figure legends**

8 601  
9 602 Figure 1: Preferred Reporting Items for Systematic Reviews and Meta-Analysis (PRISMA). [24]  
10 603

11 604 Figure 2: The Joanna Briggs Institute Critical appraisal checklist for quasi-experimental  
12 605 studies was used for the risk of bias assessment. [30]  
13 606  
14 607  
15 608  
16 609  
17 610  
18 611  
19 612  
20  
21  
22  
23  
24  
25  
26  
27  
28  
29  
30  
31  
32  
33  
34  
35  
36  
37  
38  
39  
40  
41  
42  
43  
44  
45  
46  
47  
48  
49  
50  
51  
52  
53  
54  
55  
56  
57  
58  
59  
60

For peer review only

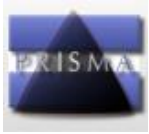

1  
2  
3  
4  
5  
6  
7  
8  
9  
10  
11  
12  
13  
14  
15  
16  
17  
18  
19  
20  
21  
22  
23  
24  
25  
26  
27  
28  
29  
30  
31  
32  
33  
34  
35  
36  
37  
38  
39  
40  
41  
42  
43  
44  
45  
46  
47  
48  
49  
50  
51  
52  
53  
54  
55  
56  
57  
58  
59  
60

Identification

Records identified through  
database searching  
(n=2981)  
  
(Embase n=1572, Cinahl n=209,  
Medline n=1200)

Screening

Duplicates removed  
(n=923)

Title and abstract screened  
(n=2058)

Records excluded  
(n=1879)

Eligibility

Full-text articles assessed  
for eligibility  
(n=179)

Full-text articles excluded,  
with reasons  
(n=173)

- 82 wrong study design
- 27 not a preoperative anaesthesia clinic
- 23 not a research paper
- 18 abstract/conference/ editorial letter
- 15 wrong interventions/ setting
- 2 full text not available
- 4 duplicates
- 2 wrong languages

Studies included in  
systematic review  
(n=6)

Included

Additional searching in  
references (=1)

Studies included in  
systematic review  
(n=7)

Figure 1: Preferred Reporting Items for Systematic Reviews and Meta-Analysis (PRISMA). [24]

|                   | Are cause and effect clear? | Are comparison participants similar? | Did comparison participants have similar care? | Was there a control group? | Were there multiple pre post measurements? | Was follow-up complete? | Were outcomes measured the same way? | Were outcomes measured in reliable way? | Was appropriate stat analysis used? |
|-------------------|-----------------------------|--------------------------------------|------------------------------------------------|----------------------------|--------------------------------------------|-------------------------|--------------------------------------|-----------------------------------------|-------------------------------------|
| Farasatkish 2009  | +                           | +                                    | ?                                              | +                          | -                                          | ?                       | +                                    | +                                       | +                                   |
| Kamal 2011        | +                           | ?                                    | ?                                              | +                          | -                                          | ?                       | ?                                    | ?                                       | ?                                   |
| Kamau 2017        | +                           | +                                    | -                                              | +                          | -                                          | +                       | +                                    | +                                       | +                                   |
| Klopfenstein 2000 | +                           | -                                    | +                                              | +                          | -                                          | ?                       | +                                    | +                                       | +                                   |
| Lee 2012          | +                           | +                                    | -                                              | +                          | -                                          | ?                       | +                                    | +                                       | +                                   |
| Mendes 2005       | +                           | ?                                    | ?                                              | +                          | -                                          | ?                       | ?                                    | ?                                       | +                                   |
| van Klei 2002     | +                           | +                                    | -                                              | +                          | -                                          | ?                       | +                                    | +                                       | +                                   |

Figure 2: The Joanna Briggs Institute Critical appraisal checklist for quasi-experimental studies was used for the risk of bias assessment. [30]

# Appendix 1: Search strategies

## Table of Content

|      |                                                        |   |
|------|--------------------------------------------------------|---|
| 1.   | <b>Database Search Strategies</b> .....                | 2 |
| 2.   | <b>Initial searches, 11 September 2018</b> .....       | 2 |
| 2.1. | <b>Main Databases</b> .....                            | 2 |
|      | Database: Embase, (Ovid).....                          | 2 |
|      | Database: Medline (Ovid) .....                         | 2 |
|      | Database: Cinahl Plus with Full Text (EBSCOhost).....  | 3 |
| 3.   | <b>Search update, 3 February 2020</b> .....            | 3 |
| 3.1. | <b>Main Databases</b> .....                            | 3 |
|      | Database: Embase (Ovid).....                           | 3 |
|      | Database: Medline (Ovid) .....                         | 4 |
|      | Database: Cinahl Plus with Full Text (EBSCO host)..... | 4 |
| 4.   | <b>Search update, 4 February 2021</b> .....            | 5 |
| 4.1. | <b>Main Databases</b> .....                            | 5 |
|      | Database: Embase (Ovid).....                           | 5 |
|      | Database: Medline (Ovid) .....                         | 5 |
|      | Database: Cinahl Plus with Full Text (EBSCO host)..... | 6 |

## 1. Database Search Strategies

The search mode for CINAHL was Boolean/Phrase. For those searches that are done without search fields - it is automatically searched in the standard fields that CINAHL uses, including words from title, summary, and subject headings.

Search 1 and Search 2 are with words in the title (TI in front of the keywords), however this have not been done with the other searches.

Embase and Medline have the same search mode because we are searching for words from title, summary, and subject headings.

## 2. Initial searches, 11 September 2018

### 2.1. Main Databases

*Database: Embase, (Ovid)*

Results: n=1287

Search:

- 1 ((pre-operativ\* or preoperativ\* or pre operativ\*) and (assessment\* or measurement\* or evaluat\*)).ti.
- 2 (clinic\* or unit\* or nurs\* or outpatient\* or ward\* or center\* or centre\*).ti.
- 3 1 and 2
- 4 ((preanaesthe\* or pre-anaesthe\* or pre anaesthe\* or pre-anesthe\* or preanesthe\* or pre anesthe\*) adj4 (assessment\* or measurement\* or evaluat\* or clinic\* or nurs\* or unit\* or outpatient\* or ward\* or center\* or centre\*)).ti,ab. (689)
- 5 (((pre-admiss\* or preadmiss\*) adj4 (assessment\* or measurement\* or evaluat\* or clinic\* or unit\* or nurs\* or outpatient\* or ward\* or centre\* or center\*)) and (surg\* or anaesthe\* or anesthe\* or preoperativ\* or pre-operativ\* or preanaesthe\* or pre-anaesthe\* or pre anaesthe\* or pre-anesthe\* or preanesthe\* or pre anesthe\*)).ti,ab.
- 6 ((anaesthe\* or anasthe\* or anesthe\*) adj4 outpatient\* adj4 clinic\*).ti,ab.
- 7 ((pre-admiss\* or preadmiss\*) adj4 (center\* or centre\*) adj4 (evaluat\* or assessment\* or measurement\*)).ti,ab.
- 8 or/3-7
- 9 limit 8 to yr="1996 -Current"
- 10 limit 9 to (conference abstracts or embase)

*Database: Medline (Ovid)*

Results: n=997

Search:

- 1 ((pre-operativ\* or preoperativ\* or pre operativ\*) and (assessment\* or measurement\* or evaluat\*)).ti.
- 2 clinic\* or unit\* or nurs\* or outpatient\* or ward\* or center\* or centre\*).ti.
- 3 1 and 2

1  
2  
3 4 ((preanaesthe\* or pre-anaesthe\* or pre anaesthe\* or pre-anesthe\* or  
4 preanesthe\* or pre anesthe\*) adj4 (assessment\* or measurement\* or evaluat\* or  
5 clinic\* or nurs\* or unit\* or outpatient\* or ward\* or center\* or centre\*)).ti,ab.  
6 5 (((pre-admiss\* or preadmiss\*) adj4 (assessment\* or measurement\* or evaluat\*  
7 or clinic\* or unit\* or nurs\* or outpatient\* or ward\* or centre\* or center\*)) and (surg\*  
8 or anaesthe\* or anesthe\* or preoperativ\* or pre-operativ\* or preanaesthe\* or pre-  
9 anaesthe\* or pre anaesthe\* or pre-anesthe\* or preanesthe\* or pre  
10 anesthe\*)).ti,ab.  
11 6 ((anaesthe\* or anasthe\* or anesthe\*) adj4 outpatient\* adj4 clinic\*).ti,ab.  
12 7 ((pre-admiss\* or preadmiss\*) adj4 (center\* or centre\*) adj4 (evaluat\* or  
13 assessment\* or measurement\*)).ti,ab.  
14 8 or/3-7  
15 9 limit 8 to yr="1996 -Current"  
16 10 remove duplicates from 9

17  
18  
19  
20  
21 *Database: Cinahl Plus with Full Text (EBSCOhost)*

22  
23 Results: n=132

24 Search:

25 1 TI ((pre-operativ\* or preoperativ\* or "pre operativ\*") AND (assessment\* or  
26 measurement\* or evaluat\*))  
27 2 TI (clinic\* or unit\* or nurs\* or outpatient\* or ward\* or center\* or centre\*)  
28 3 S1 AND S2  
29 4 (preanaesthe\* or pre-anaesthe\* or "pre anaesthe\*" or pre-anesthe\* or  
30 preanesthe\* or "pre anesthe\*") N3 (assessment\* or measurement\* or evaluat\* or  
31 clinic\* or nurs\* or unit\* or outpatient\* or ward\* or centre\* or center\*)  
32 5 ((pre-admiss\* or preadmiss\*) N3 (assessment\* or measurement\* or evaluat\* or  
33 clinic\* or unit\* or nurs\* or outpatient\* or ward\* or centre\* or center\*)) AND (surg\*  
34 or anaesthe\* or anesthe\* or preoperativ\* or "pre operativ\*" pre-operativ\* or  
35 preanaesthe\* or pre-anaesthe\* or pre-anesthe\* or preanesthe\* or "pre anesthe\*")  
36 6 (anaesthe\* or anasthe\* or anesthe\*) N3 outpatient\* N3 clinic\*  
37 7 (pre-admiss\* or preadmiss\*) N3 (center\* or centre\*) N3 (evaluat\* or  
38 assessment\* or measurement\*)  
39 8 S3 OR S4 OR S5 OR S6 OR S7  
40 9 S3 OR S4 OR S5 OR S6 OR S7 Limiters - Published Date: 19960101-  
41 20181231; Exclude MEDLINE records  
42  
43  
44  
45

### 46 3. Search update, 3 February 2020

#### 47 3.1. Main Databases

48  
49  
50  
51 *Database: Embase (Ovid)*

52  
53 Results: n=1453

54 Search:

55 1 ((pre-operativ\* or preoperativ\* or pre operativ\*) and (assessment\* or  
56 measurement\* or evaluat\*)).ti.  
57 2 (clinic\* or unit\* or nurs\* or outpatient\* or ward\* or center\* or centre\*).ti.  
58 3 1 and 2  
59  
60

1  
2  
3 4 ((preanaesthe\* or pre-anaesthe\* or pre anaesthe\* or pre-anesthe\* or  
4 preanesthe\* or pre anesthe\*) adj4 (assessment\* or measurement\* or evaluat\* or  
5 clinic\* or nurs\* or unit\* or outpatient\* or ward\* or center\* or centre\*)).ti,ab.  
6 5 (((pre-admiss\* or preadmiss\*) adj4 (assessment\* or measurement\* or evaluat\*  
7 or clinic\* or unit\* or nurs\* or outpatient\* or ward\* or centre\* or center\*)) and (surg\*  
8 or anaesthe\* or anesthe\* or preoperativ\* or pre-operativ\* or preanaesthe\* or pre-  
9 anaesthe\* or pre anaesthe\* or pre-anesthe\* or preanesthe\* or pre  
10 anesthe\*)).ti,ab.  
11 6 ((anaesthe\* or anasthe\* or anesthe\*) adj4 outpatient\* adj4 clinic\*).ti,ab.  
12 7 ((pre-admiss\* or preadmiss\*) adj4 (center\* or centre\*) adj4 (evaluat\* or  
13 assessment\* or measurement\*)).ti,ab.  
14 8 or/3-7  
15 9 limit 8 to yr="1996 -Current"  
16 10 limit 9 to (conference abstracts or embase)

17  
18  
19  
20  
21  
22 *Database: Medline (Ovid)*

23  
24 Results: n=1105

25 Search:

26 1 ((pre-operativ\* or preoperativ\* or pre operativ\*) and (assessment\* or  
27 measurement\* or evaluat\*)).ti.  
28 2 (clinic\* or unit\* or nurs\* or outpatient\* or ward\* or center\* or centre\*).ti.  
29 3 1 and 2  
30 4 ((preanaesthe\* or pre-anaesthe\* or pre anaesthe\* or pre-anesthe\* or  
31 preanesthe\* or pre anesthe\*) adj4 (assessment\* or measurement\* or evaluat\* or  
32 clinic\* or nurs\* or unit\* or outpatient\* or ward\* or center\* or centre\*)).ti,ab.  
33 5 (((pre-admiss\* or preadmiss\*) adj4 (assessment\* or measurement\* or evaluat\*  
34 or clinic\* or unit\* or nurs\* or outpatient\* or ward\* or centre\* or center\*)) and (surg\*  
35 or anaesthe\* or anesthe\* or preoperativ\* or pre-operativ\* or preanaesthe\* or pre-  
36 anaesthe\* or pre anaesthe\* or pre-anesthe\* or preanesthe\* or pre  
37 anesthe\*)).ti,ab.  
38 6 ((anaesthe\* or anasthe\* or anesthe\*) adj4 outpatient\* adj4 clinic\*).ti,ab.  
39 7 ((pre-admiss\* or preadmiss\*) adj4 (center\* or centre\*) adj4 (evaluat\* or  
40 assessment\* or measurement\*)).ti,ab.  
41 8 or/3-7  
42 9 limit 8 to yr="1996 -Current"

43  
44  
45  
46  
47 *Database: Cinahl Plus with Full Text (EBSCO host)*

48  
49 Results: n=166

50 Search:

51 1TI ((pre-operativ\* or preoperativ\* or "pre operativ\*") AND (assessment\* or  
52 measurement\* or evaluat\*))  
53 2 TI (clinic\* or unit\* or nurs\* or outpatient\* or ward\* or center\* or centre\*)  
54 3 S1 AND S2  
55 4 (preanaesthe\* or pre-anaesthe\* or "pre anaesthe\*" or pre-anesthe\* or  
56 preanesthe\* or "pre anesthe\*") N3 (assessment\* or measurement\* or evaluat\* or  
57 clinic\* or nurs\* or unit\* or outpatient\* or ward\* or centre\* or center\*)  
58  
59  
60



5 ((pre-admiss\* or preadmiss\*) N3 (assessment\* or measurement\* or evaluat\* or  
 6 clinic\* or unit\* or nurs\* or outpatient\* or ward\* or centre\* or center\*)) AND (surg\*  
 7 or anaesthe\* or aneste\* or preoperativ\* or "pre operativ\*" pre-operativ\* or  
 8 preanaesthe\* or pre-anaesthe\* or pre-anesthe\* or preanesthe\* or "pre anesthe\*")  
 9 6 (anaesthe\* or anasthe\* or anesthe\*) N3 outpatient\* N3 clinic\* 23  
 10 (pre-admiss\* or preadmiss\*) N3 (center\* or centre\*) N3 (evalu\* or assessment\*  
 11 or measurement\*)  
 12 7 S3 OR S4 OR S5 OR S6 OR S7 487  
 13 8 S3 OR S4 OR S5 OR S6 OR S7 Limiters - Published Date: 19960101-;  
 14 Exclude MEDLINE records

#### 4. Search update, 4 February 2021

##### 4.1. Main Databases

*Database: Embase (Ovid)*

Results: n=1572

Search:

- 1 ((pre-operativ\* or preoperativ\* or pre operativ\*) and (assessment\* or  
 measurement\* or evaluat\*)).ti.
- 2 (clinic\* or unit\* or nurs\* or outpatient\* or ward\* or center\* or centre\*).ti.
- 3 1 and 2
- 4 ((preanaesthe\* or pre-anaesthe\* or pre anaesthe\* or pre-anesthe\* or  
 preanesthe\* or pre anesthe\*) adj4 (assessment\* or measurement\* or evaluat\* or  
 clinic\* or nurs\* or unit\* or outpatient\* or ward\* or center\* or centre\*).ti,ab.
- 5 (((pre-admiss\* or preadmiss\*) adj4 (assessment\* or measurement\* or evaluat\*  
 or clinic\* or unit\* or nurs\* or outpatient\* or ward\* or centre\* or center\*)) and (surg\*  
 or anaesthe\* or aneste\* or preoperativ\* or pre-operativ\* or preanaesthe\* or pre-  
 anaesthe\* or pre anaesthe\* or pre-anesthe\* or preanesthe\* or pre  
 anesthe\*).ti,ab.
- 6 ((anaesthe\* or anasthe\* or anesthe\*) adj4 outpatient\* adj4 clinic\*).ti,ab.
- 7 ((pre-admiss\* or preadmiss\*) adj4 (center\* or centre\*) adj4 (evalu\* or  
 assessment\* or measurement\*)).ti,ab.
- 8 or/3-7
- 9 limit 8 to yr="1996 -Current"
- 10 limit 9 to (conference abstracts or embase)

*Database: Medline (Ovid)*

Results: n=1200

Search:

- 1 ((pre-operativ\* or preoperativ\* or pre operativ\*) and (assessment\* or  
 measurement\* or evaluat\*)).ti.
- 2 (clinic\* or unit\* or nurs\* or outpatient\* or ward\* or center\* or centre\*).ti.
- 3 1 and 2
- 4 ((preanaesthe\* or pre-anaesthe\* or pre anaesthe\* or pre-anesthe\* or  
 preanesthe\* or pre anesthe\*) adj4 (assessment\* or measurement\* or evaluat\* or  
 clinic\* or nurs\* or unit\* or outpatient\* or ward\* or center\* or centre\*).ti,ab.

5 (((pre-admiss\* or preadmiss\*) adj4 (assessment\* or measurement\* or evaluat\*  
 6 or clinic\* or unit\* or nurs\* or outpatient\* or ward\* or centre\* or center\*)) and (surg\*  
 7 or anaesthe\* or anesthe\* or preoperativ\* or pre-operativ\* or preanaesthe\* or pre-  
 8 anaesthe\* or pre anaesthe\* or pre-anesthe\* or preanesthe\* or pre  
 9 anesthe\*).ti,ab.

6 ((anaesthe\* or anasthe\* or anesthe\*) adj4 outpatient\* adj4 clinic\*).ti,ab.

7 ((pre-admiss\* or preadmiss\*) adj4 (center\* or centre\*) adj4 (evaluat\* or  
 8 assessment\* or measurement\*).ti,ab. (4)

8 or/3-7

9 limit 8 to yr="1996 -Current"

16 *Database: Cinahl Plus with Full Text (EBSCO host)*

18 Results: n=209

19 Search:

20 1 TI ((pre-operativ\* or preoperativ\* or "pre operativ\*") AND (assessment\* or  
 21 measurement\* or evaluat\*))

22 2 TI (clinic\* or unit\* or nurs\* or outpatient\* or ward\* or center\* or centre\*)

23 3 S1 AND S2

24 4 (preanaesthe\* or pre-anaesthe\* or "pre anaesthe\*" or pre-anesthe\* or  
 25 preanesthe\* or "pre anesthe\*") N3 (assessment\* or measurement\* or evaluat\* or  
 26 clinic\* or nurs\* or unit\* or outpatient\* or ward\* or centre\* or center\*)

27 5 ((pre-admiss\* or preadmiss\*) N3 (assessment\* or measurement\* or evaluat\*  
 28 or clinic\* or unit\* or nurs\* or outpatient\* or ward\* or centre\* or center\*)) AND  
 29 (surg\* or anaesthe\* or anesthe\* or preoperativ\* or "pre operativ\*" pre-operativ\* or  
 30 preanaesthe\* or pre-anaesthe\* or pre-anesthe\* or preanesthe\* or "pre anesthe\*")

31 6 (anaesthe\* or anasthe\* or anesthe\*) N3 outpatient\* N3 clinic\* 30

32 7 (pre-admiss\* or preadmiss\*) N3 (center\* or centre\*) N3 (evaluat\* or  
 33 assessment\* or measurement\*)

34 8 S3 OR S4 OR S5 OR S6 OR S7

35 9 S3 OR S4 OR S5 OR S6 OR S7 Limiters - Published Date: 19960101-;

36 Exclude MEDLINE records

# Reporting checklist for systematic review and meta-analysis.

Based on the PRISMA guidelines.

## Instructions to authors

Complete this checklist by entering the page numbers from your manuscript where readers will find each of the items listed below.

Your article may not currently address all the items on the checklist. Please modify your text to include the missing information. If you are certain that an item does not apply, please write "n/a" and provide a short explanation.

Upload your completed checklist as an extra file when you submit to a journal.

In your methods section, say that you used the PRISMA reporting guidelines, and cite them as:

Moher D, Liberati A, Tetzlaff J, Altman DG, The PRISMA Group. Preferred Reporting Items for Systematic Reviews and Meta-Analyses: The PRISMA Statement

|                     | Reporting Item                                                                                                                                                                                                                                                                                                                | Page Number |
|---------------------|-------------------------------------------------------------------------------------------------------------------------------------------------------------------------------------------------------------------------------------------------------------------------------------------------------------------------------|-------------|
| <b>Title</b>        |                                                                                                                                                                                                                                                                                                                               |             |
|                     | <a href="#">#1</a> Identify the report as a systematic review, meta-analysis, or both.                                                                                                                                                                                                                                        | 1           |
| <b>Abstract</b>     |                                                                                                                                                                                                                                                                                                                               |             |
| Structured summary  | <a href="#">#2</a> Provide a structured summary including, as applicable: background; objectives; data sources; study eligibility criteria, participants, and interventions; study appraisal and synthesis methods; results; limitations; conclusions and implications of key findings; systematic review registration number | 2           |
| <b>Introduction</b> |                                                                                                                                                                                                                                                                                                                               |             |
| Rationale           | <a href="#">#3</a> Describe the rationale for the review in the context of what is already known.                                                                                                                                                                                                                             | 3-5         |

|    |                                    |                     |                                                                                                                                                                                                                                 |                        |
|----|------------------------------------|---------------------|---------------------------------------------------------------------------------------------------------------------------------------------------------------------------------------------------------------------------------|------------------------|
| 1  | Objectives                         | <a href="#">#4</a>  | Provide an explicit statement of questions being addressed with reference to participants, interventions, comparisons, outcomes, and study design (PICOS).                                                                      | 5                      |
| 2  |                                    |                     |                                                                                                                                                                                                                                 |                        |
| 3  |                                    |                     |                                                                                                                                                                                                                                 |                        |
| 4  |                                    |                     |                                                                                                                                                                                                                                 |                        |
| 5  |                                    |                     |                                                                                                                                                                                                                                 |                        |
| 6  | <b>Methods</b>                     |                     |                                                                                                                                                                                                                                 |                        |
| 7  |                                    |                     |                                                                                                                                                                                                                                 |                        |
| 8  |                                    |                     |                                                                                                                                                                                                                                 |                        |
| 9  | Protocol and registration          | <a href="#">#5</a>  | Indicate if a review protocol exists, if and where it can be accessed (e.g., Web address) and, if available, provide registration information including the registration number.                                                | 5                      |
| 10 |                                    |                     |                                                                                                                                                                                                                                 |                        |
| 11 |                                    |                     |                                                                                                                                                                                                                                 |                        |
| 12 |                                    |                     |                                                                                                                                                                                                                                 |                        |
| 13 |                                    |                     |                                                                                                                                                                                                                                 |                        |
| 14 | Eligibility criteria               | <a href="#">#6</a>  | Specify study characteristics (e.g., PICOS, length of follow-up) and report characteristics (e.g., years considered, language, publication status) used as criteria for eligibility, giving rational                            | 6                      |
| 15 |                                    |                     |                                                                                                                                                                                                                                 |                        |
| 16 |                                    |                     |                                                                                                                                                                                                                                 |                        |
| 17 |                                    |                     |                                                                                                                                                                                                                                 |                        |
| 18 |                                    |                     |                                                                                                                                                                                                                                 |                        |
| 19 |                                    |                     |                                                                                                                                                                                                                                 |                        |
| 20 |                                    |                     |                                                                                                                                                                                                                                 |                        |
| 21 | Information sources                | <a href="#">#7</a>  | Describe all information sources in the search (e.g., databases with dates of coverage, contact with study authors to identify additional studies) and date last searched.                                                      | 5,6                    |
| 22 |                                    |                     |                                                                                                                                                                                                                                 |                        |
| 23 |                                    |                     |                                                                                                                                                                                                                                 |                        |
| 24 |                                    |                     |                                                                                                                                                                                                                                 |                        |
| 25 |                                    |                     |                                                                                                                                                                                                                                 |                        |
| 26 |                                    |                     |                                                                                                                                                                                                                                 |                        |
| 27 |                                    |                     |                                                                                                                                                                                                                                 |                        |
| 28 | Search                             | <a href="#">#8</a>  | Present full electronic search strategy for at least one database, including any limits used, such that it could be repeated.                                                                                                   | 5,6 +<br>APPENDIX<br>1 |
| 29 |                                    |                     |                                                                                                                                                                                                                                 |                        |
| 30 |                                    |                     |                                                                                                                                                                                                                                 |                        |
| 31 |                                    |                     |                                                                                                                                                                                                                                 |                        |
| 32 |                                    |                     |                                                                                                                                                                                                                                 |                        |
| 33 | Study selection                    | <a href="#">#9</a>  | State the process for selecting studies (i.e., for screening, for determining eligibility, for inclusion in the systematic review, and, if applicable, for inclusion in the meta-analysis).                                     | 6                      |
| 34 |                                    |                     |                                                                                                                                                                                                                                 |                        |
| 35 |                                    |                     |                                                                                                                                                                                                                                 |                        |
| 36 |                                    |                     |                                                                                                                                                                                                                                 |                        |
| 37 |                                    |                     |                                                                                                                                                                                                                                 |                        |
| 38 |                                    |                     |                                                                                                                                                                                                                                 |                        |
| 39 |                                    |                     |                                                                                                                                                                                                                                 |                        |
| 40 | Data collection process            | <a href="#">#10</a> | Describe the method of data extraction from reports (e.g., piloted forms, independently by two reviewers) and any processes for obtaining and confirming data from investigators.                                               | 6-7                    |
| 41 |                                    |                     |                                                                                                                                                                                                                                 |                        |
| 42 |                                    |                     |                                                                                                                                                                                                                                 |                        |
| 43 |                                    |                     |                                                                                                                                                                                                                                 |                        |
| 44 |                                    |                     |                                                                                                                                                                                                                                 |                        |
| 45 |                                    |                     |                                                                                                                                                                                                                                 |                        |
| 46 | Data items                         | <a href="#">#11</a> | List and define all variables for which data were sought (e.g., PICOS, funding sources), and any assumptions and simplifications made.                                                                                          | 5-7                    |
| 47 |                                    |                     |                                                                                                                                                                                                                                 |                        |
| 48 |                                    |                     |                                                                                                                                                                                                                                 |                        |
| 49 |                                    |                     |                                                                                                                                                                                                                                 |                        |
| 50 |                                    |                     |                                                                                                                                                                                                                                 |                        |
| 51 |                                    |                     |                                                                                                                                                                                                                                 |                        |
| 52 | Risk of bias in individual studies | <a href="#">#12</a> | Describe methods used for assessing risk of bias in individual studies (including specification of whether this was done at the study or outcome level, or both), and how this information is to be used in any data synthesis. | 6-7                    |
| 53 |                                    |                     |                                                                                                                                                                                                                                 |                        |
| 54 |                                    |                     |                                                                                                                                                                                                                                 |                        |
| 55 |                                    |                     |                                                                                                                                                                                                                                 |                        |
| 56 |                                    |                     |                                                                                                                                                                                                                                 |                        |
| 57 |                                    |                     |                                                                                                                                                                                                                                 |                        |
| 58 |                                    |                     |                                                                                                                                                                                                                                 |                        |
| 59 |                                    |                     |                                                                                                                                                                                                                                 |                        |
| 60 |                                    |                     |                                                                                                                                                                                                                                 |                        |

|    |                    |                     |                                                                 |             |
|----|--------------------|---------------------|-----------------------------------------------------------------|-------------|
| 1  | Summary            | <a href="#">#13</a> | State the principal summary measures (e.g., risk ratio,         | N/A         |
| 2  | measures           |                     | difference in means).                                           |             |
| 3  |                    |                     |                                                                 |             |
| 4  | Planned            | <a href="#">#14</a> | Describe the methods of handling data and combining             | 7           |
| 5  | methods of         |                     | results of studies, if done, including measures of              |             |
| 6  | analysis           |                     | consistency (e.g., I <sup>2</sup> ) for each meta-analysis.     |             |
| 7  |                    |                     |                                                                 |             |
| 8  | Risk of bias       | <a href="#">#15</a> | Specify any assessment of risk of bias that may affect the      | 12          |
| 9  | across studies     |                     | cumulative evidence (e.g., publication bias, selective          |             |
| 10 |                    |                     | reporting within studies).                                      |             |
| 11 |                    |                     |                                                                 |             |
| 12 | Additional         | <a href="#">#16</a> | Describe methods of additional analyses (e.g., sensitivity or   | N/A         |
| 13 | analyses           |                     | subgroup analyses, meta-regression), if done, indicating        |             |
| 14 |                    |                     | which were pre-specified.                                       |             |
| 15 |                    |                     |                                                                 |             |
| 16 |                    |                     |                                                                 |             |
| 17 |                    |                     |                                                                 |             |
| 18 |                    |                     |                                                                 |             |
| 19 |                    |                     |                                                                 |             |
| 20 |                    |                     |                                                                 |             |
| 21 | <b>Results</b>     |                     |                                                                 |             |
| 22 |                    |                     |                                                                 |             |
| 23 | Study selection    | <a href="#">#17</a> | Give numbers of studies screened, assessed for eligibility,     | 8           |
| 24 |                    |                     | and included in the review, with reasons for exclusions at      |             |
| 25 |                    |                     | each stage, ideally with a <a href="#">flow diagram</a> .       |             |
| 26 |                    |                     |                                                                 |             |
| 27 |                    |                     |                                                                 |             |
| 28 | Study              | <a href="#">#18</a> | For each study, present characteristics for which data were     | N/A         |
| 29 | characteristics    |                     | extracted (e.g., study size, PICOS, follow-up period) and       |             |
| 30 |                    |                     | provide the citation.                                           |             |
| 31 |                    |                     |                                                                 |             |
| 32 |                    |                     |                                                                 |             |
| 33 |                    |                     |                                                                 |             |
| 34 | Risk of bias       | <a href="#">#19</a> | Present data on risk of bias of each study and, if available,   | 12 + Figure |
| 35 | within studies     |                     | any outcome-level assessment (see Item 12).                     |             |
| 36 |                    |                     |                                                                 |             |
| 37 |                    |                     |                                                                 |             |
| 38 | Results of         | <a href="#">#20</a> | For all outcomes considered (benefits and harms), present,      | 12-16       |
| 39 | individual studies |                     | for each study: (a) simple summary data for each                |             |
| 40 |                    |                     | intervention group and (b) effect estimates and confidence      |             |
| 41 |                    |                     | intervals, ideally with a forest plot.                          |             |
| 42 |                    |                     |                                                                 |             |
| 43 |                    |                     |                                                                 |             |
| 44 | Synthesis of       | <a href="#">#21</a> | Present the main results of the review. If meta-analyses are    | 12-16       |
| 45 | results            |                     | done, include for each, confidence intervals and measures       |             |
| 46 |                    |                     | of consistency.                                                 |             |
| 47 |                    |                     |                                                                 |             |
| 48 |                    |                     |                                                                 |             |
| 49 |                    |                     |                                                                 |             |
| 50 | Risk of bias       | <a href="#">#22</a> | Present results of any assessment of risk of bias across        | N/A         |
| 51 | across studies     |                     | studies (see Item 15).                                          |             |
| 52 |                    |                     |                                                                 |             |
| 53 |                    |                     |                                                                 |             |
| 54 | Additional         | <a href="#">#23</a> | Give results of additional analyses, if done (e.g., sensitivity | N/A         |
| 55 | analysis           |                     | or subgroup analyses, meta-regression [see Item 16]).           |             |
| 56 |                    |                     |                                                                 |             |

## Discussion

|    |                |                     |                                                                |       |
|----|----------------|---------------------|----------------------------------------------------------------|-------|
| 1  | Summary of     | <a href="#">#24</a> | Summarize the main findings, including the strength of         | 16-19 |
| 2  | Evidence       |                     | evidence for each main outcome; consider their relevance       |       |
| 3  |                |                     | to key groups (e.g., health care providers, users, and policy  |       |
| 4  |                |                     | makers                                                         |       |
| 5  |                |                     |                                                                |       |
| 6  |                |                     |                                                                |       |
| 7  |                |                     |                                                                |       |
| 8  | Limitations    | <a href="#">#25</a> | Discuss limitations at study and outcome level (e.g., risk of  | 19    |
| 9  |                |                     | bias), and at review level (e.g., incomplete retrieval of      |       |
| 10 |                |                     | identified research, reporting bias).                          |       |
| 11 |                |                     |                                                                |       |
| 12 |                |                     |                                                                |       |
| 13 | Conclusions    | <a href="#">#26</a> | Provide a general interpretation of the results in the context | 20    |
| 14 |                |                     | of other evidence, and implications for future research.       |       |
| 15 |                |                     |                                                                |       |
| 16 |                |                     |                                                                |       |
| 17 | <b>Funding</b> |                     |                                                                |       |
| 18 |                |                     |                                                                |       |
| 19 | Funding        | <a href="#">#27</a> | Describe sources of funding or other support (e.g., supply     | 21    |
| 20 |                |                     | of data) for the systematic review; role of funders for the    |       |
| 21 |                |                     | systematic review.                                             |       |
| 22 |                |                     |                                                                |       |
| 23 |                |                     |                                                                |       |

None The PRISMA checklist is distributed under the terms of the Creative Commons Attribution License CC-BY. This checklist can be completed online using <https://www.goodreports.org/>, a tool made by the [EQUATOR Network](#) in collaboration with [Penelope.ai](#)

# BMJ Open

## Effectiveness of pre-anaesthetic assessment clinic: A systematic review of randomised and non-randomised prospective controlled studies

|                                 |                                                                                                                                                                                                                                                                                                                                                   |
|---------------------------------|---------------------------------------------------------------------------------------------------------------------------------------------------------------------------------------------------------------------------------------------------------------------------------------------------------------------------------------------------|
| Journal:                        | <i>BMJ Open</i>                                                                                                                                                                                                                                                                                                                                   |
| Manuscript ID                   | bmjopen-2021-054206.R2                                                                                                                                                                                                                                                                                                                            |
| Article Type:                   | Original research                                                                                                                                                                                                                                                                                                                                 |
| Date Submitted by the Author:   | 16-Mar-2022                                                                                                                                                                                                                                                                                                                                       |
| Complete List of Authors:       | Kristoffersen, Eirunn; University of Agder, Department of Health and Nursing Science<br>Opsal, Anne; University of Agder, Department of Health and Nursing Science<br>Tveit, Tor; University of Agder, Department of Health and Nursing Science<br>Berg , Rigmor C ; Norwegian Institute of Public Health<br>Fossum, Mariann; University of Agder |
| <b>Primary Subject Heading</b>: | Anaesthesia                                                                                                                                                                                                                                                                                                                                       |
| Secondary Subject Heading:      | Surgery, Nursing, Health services research                                                                                                                                                                                                                                                                                                        |
| Keywords:                       | Adult anaesthesia < ANAESTHETICS, Health & safety < HEALTH SERVICES ADMINISTRATION & MANAGEMENT, Quality in health care < HEALTH SERVICES ADMINISTRATION & MANAGEMENT, Adult surgery < SURGERY                                                                                                                                                    |
|                                 |                                                                                                                                                                                                                                                                                                                                                   |

SCHOLARONE™  
Manuscripts



I, the Submitting Author has the right to grant and does grant on behalf of all authors of the Work (as defined in the below author licence), an exclusive licence and/or a non-exclusive licence for contributions from authors who are: i) UK Crown employees; ii) where BMJ has agreed a CC-BY licence shall apply, and/or iii) in accordance with the terms applicable for US Federal Government officers or employees acting as part of their official duties; on a worldwide, perpetual, irrevocable, royalty-free basis to BMJ Publishing Group Ltd ("BMJ") its licensees and where the relevant Journal is co-owned by BMJ to the co-owners of the Journal, to publish the Work in this journal and any other BMJ products and to exploit all rights, as set out in our [licence](#).

The Submitting Author accepts and understands that any supply made under these terms is made by BMJ to the Submitting Author unless you are acting as an employee on behalf of your employer or a postgraduate student of an affiliated institution which is paying any applicable article publishing charge ("APC") for Open Access articles. Where the Submitting Author wishes to make the Work available on an Open Access basis (and intends to pay the relevant APC), the terms of reuse of such Open Access shall be governed by a Creative Commons licence – details of these licences and which [Creative Commons](#) licence will apply to this Work are set out in our licence referred to above.

Other than as permitted in any relevant BMJ Author's Self Archiving Policies, I confirm this Work has not been accepted for publication elsewhere, is not being considered for publication elsewhere and does not duplicate material already published. I confirm all authors consent to publication of this Work and authorise the granting of this licence.



1  
2  
3 1 **Effectiveness of pre-anaesthetic assessment clinic: A systematic review of randomised and**  
4  
5 2 **non-randomised prospective controlled studies**  
6  
7

8 3  
9  
10 4 Eirunn Wallevik Kristoffersen<sup>1,2</sup> \*, Anne Opsal<sup>1</sup>, Tor Oddbjørn Tveit<sup>1,2,3</sup>, Rigmor C Berg<sup>4,5</sup>,  
11  
12 5 Mariann Fossum<sup>1</sup>  
13  
14

15 6  
16  
17 7 <sup>1</sup>Department of Health and Nursing Science, University of Agder, Grimstad/Kristiansand,  
18  
19 8 Norway  
20  
21

22 9 <sup>2</sup>Department of Anaesthesiology and Intensive Care, Sørlandet Hospital, Kristiansand,  
23  
24 10 Norway  
25  
26

27 11 <sup>3</sup>Department of Technology and e-Health, Sørlandet Hospital, Kristiansand, Norway  
28  
29

30 12 <sup>4</sup> Department of Community Medicine, University of Tromsø, Tromsø, Norway  
31  
32

33 13 <sup>5</sup>Norwegian Institute of Public Health, Oslo, Norway  
34  
35

36 14  
37 15 \*Corresponding author:  
38

39 16 Eirunn Wallevik Kristoffersen  
40

41 17 Department of Health and Nursing Science, University of Agder, Grimstad/Kristiansand,  
42  
43 18 Norway  
44  
45

46 19 E-mail: eirunn.w.kristoffersen@uia.no  
47  
48  
49

50 20  
51 21 Word count: 4156  
52  
53

54 22  
55  
56

57 23  
58  
59  
60

1  
2  
3 24 **ABSTRACT**

4  
5 25 **Objectives:** The aim of this systematic review was to examine the effectiveness of pre-  
6  
7 26 anaesthesia assessment clinics (PACs) in improving the quality and safety of perioperative  
8  
9 27 patient care.

10  
11 28 **Design:** Systematic review.

12  
13 29 **Data sources:** The electronic databases CINAHL Plus with Full Text (EBSCOhost), Medline,  
14  
15 30 and Embase (OvidSP) were systematically searched on 11 September 2018  
16  
17 31 and updated on 3 February 2020 and 4 February 2021.

18  
19 32 **Eligibility criteria:** The inclusion criteria for this study were studies published in English or  
20  
21 33 Scandinavian language and scientific original research that included randomised or non-  
22  
23 34 randomised prospective controlled studies. Additionally, studies that reported the outcomes  
24  
25 35 from a PAC consultation with the patient present were included.

26  
27 36 **Data extraction and synthesis:** Titles, abstracts, and full texts were screened by a team of  
28  
29 37 three authors. Risk of bias was assessed using the Joanna Briggs Institute critical appraisal  
30  
31 38 checklist for quasi-experimental studies. Data extraction was performed by one author and  
32  
33 39 checked by four other authors. Results were synthesised narratively owing to the  
40  
41 40 heterogeneity of the included studies.

34  
35 41 **Results:** Seven prospective controlled studies on the effectiveness of PACs, were included.  
36  
37 42 Three studies reported a significant reduction in the length of hospital stay and two studies  
38  
39 43 reported a significant reduction in cancellation of surgery for medical reasons when patients  
40  
41 44 were seen in the PAC. In addition, the included studies presented mixed results regarding  
42  
43 45 anxiety in patients. Most studies had a high risk of bias.

44  
45 46 **Conclusion:** This systematic review demonstrated a reduction in the length of hospital stay  
46  
47 47 and cancellation of surgery when the patients had been assessed in the PAC. There is a need  
48  
49 48 for high-quality prospective studies to gain a deeper understanding of the effectiveness of  
50  
51 49 PACs.

52  
53 50 **PROSPERO registration number:** CRD42019137724  
54  
55 51

56  
57 52 **Keywords:** pre-anaesthetic assessment clinic, preoperative care, quality, safety, systematic  
58  
59 53 review  
60  
61 54  
62 55

### Strengths and limitations of this study

- An extensive database search was conducted with no limitations on outcomes and the type of pre-anaesthetic assessment clinic.
- Only randomised or non-randomised prospective controlled studies were included.
- The Joanna Briggs Institute Critical appraisal checklist for quasi-experimental studies was used.
- The included studies were heterogeneous and had a high risk of bias, which is a major limitation of this review.

### INTRODUCTION

Anaesthesia is crucial in surgery. However, it may activate physiological changes that increase morbidity and mortality,[1] depending on the patients' preoperative health status and age.[2] Hospitals treat patients with complex, comorbid healthcare problems, undergoing progressively extensive surgeries and interventions.[3,4] To ensure the quality and safety of anaesthesia and surgery, precise knowledge of the clinical characteristics of patients is critical to the perioperative management.[2] Over the past 50 years, perioperative mortality, including anaesthesia-related mortality, has declined, which is significant in developed countries,[1,5] mainly because of new anaesthetics, improved monitoring equipment and training, availability of recovery rooms, and improved airway management.[4] However, a previous review found higher rates of morbidity and mortality in non-operating room anaesthesia, which was attributed to limited preoperative evaluation.[6] A retrospective study found significant associations between perioperative mortality and age < 1 year or > 65 years, American Society of Anesthesiologists Physical Status Classification System (ASA), emergency case status, and operative start time after

1  
2  
3 84 6:00 PM.[7] This might indicate that risk factors are both patient- and surgery-related and  
4  
5 85 may be linked to organisational structures.[8]  
6  
7  
8  
9 86 Currently, an increasing number of pre-anaesthesia assessment clinics (PACs) support  
10  
11 87 hospitals internationally in handling the rising number of patients and complexity of surgical  
12  
13 88 procedures.[9] The design of PACs differs critically based on location, organisational  
14  
15 89 structure, timing, and patient groups. They primarily function as a service unit for surgeons,  
16  
17 90 patients, and the anaesthetic team.[10] The PAC consultation, by the anaesthesiologist,  
18  
19 91 anaesthesia nurse, or both, is a globally recognised evaluation method and optimises the  
20  
21 92 patients' medical condition prior to surgery and anaesthesia.[2] Thus, it is essential for  
22  
23 93 secure anaesthetic practice since it detects anaesthesia-related risk factors and high-risk  
24  
25 94 patients, improves patient outcomes, prepares the patient physically and psychologically for  
26  
27 95 anaesthesia, and ensures the patient's most favourable condition for surgery and  
28  
29 96 anaesthesia.[11-13] This is primarily performed by interviewing and examining the patient;  
30  
31 97 reviewing previous medical, surgical and anaesthesia issues; evaluating current medication;  
32  
33 98 and obtaining and reviewing preoperative tests.[10] PACs also allow increased  
34  
35 99 communication between healthcare providers and coordination with postoperative  
36  
37 100 care.[14,15] Because of well-prepared patients and staff, several researchers have indicated  
38  
39 101 that with PAC, the number of surgical cancellations, length of hospital stay, laboratory tests,  
40  
41 102 and mortality rate have reduced.[7,16,17] Others assert that patients feel less anxious  
42  
43 103 regarding the subsequent anaesthetic and surgical processes and are highly satisfied with  
44  
45 104 the service with PAC consultations.[16,18,19]  
46  
47  
48  
49  
50  
51  
52  
53  
54  
55  
56 105 As Turunen *et al.* stated, research on PACs regarding costs, financial savings, the impact on  
57  
58 106 patient safety and quality of care, accuracy of the number of operative patients, and effect  
59  
60

1  
2  
3 107 on preoperative nursing levels, is scarce.[20] Survey results indicate that anaesthesiologists  
4  
5 108 perceive day of surgery delays due to missing information as common, even with PAC  
6  
7  
8 109 consultations.[21] This systematic review aimed to examine the effectiveness of PACs in  
9  
10 110 improving the quality and safety of perioperative patient care. Further, we aimed to  
11  
12 111 determine the gaps in existing knowledge for future research.  
13  
14  
15

## 16 112 **METHODS**

17  
18  
19 113 Our systematic review followed the guidelines in the Cochrane Handbook for Systematic  
20  
21 114 Reviews of Interventions[22] and was reported in accordance with the Preferred Reporting  
22  
23 115 Items for Systematic Reviews and Meta-Analyses (PRISMA) guidelines.[23] The protocol was  
24  
25 116 registered in PROSPERO: CRD42019137724.[24]  
26  
27

28  
29 117 The two review questions were:

- 30  
31 118 1. Is PAC effective in improving patient satisfaction and safety, while reducing anxiety?  
32  
33 119 2. Is PAC effective in reducing cancellation rate and cost of surgery, and improving the  
34  
35 120 efficiency of perioperative patient care?  
36  
37  
38

## 39 121 **Search strategies**

40  
41  
42 122 We performed a scoping search in different databases to identify the key terms.[25,26] The  
43  
44 123 final search was planned and conducted in close collaboration with the university librarian.  
45  
46

47 124 On 11 September 2018 we searched CINAHL Plus with Full Text (EBSCOhost), Medline, and  
48  
49 125 Embase (OvidSP) databases, which were updated on 3 February 2020 and 4 February 2021.  
50  
51

52 126 Considering the lack of subject headings (e.g., MeSH) for PAC, we combined text words, such  
53  
54 127 as 'pre-anaesthesia', 'nurse', 'surgery', 'anaesthesia', 'preoperative', 'assessment',  
55  
56 128 'measurement', 'evaluate', 'preadmission', 'centre', 'clinic', 'ward', 'unit', and 'outpatient'.  
57  
58

59 129 The searches are detailed in Appendix 1. The search mode in CINAHL was Boolean/Phase,  
60

1  
2  
3 130 which supports Boolean searching or exact phrase searching. For comprehensiveness, we  
4  
5  
6 131 used both the truncation and proximity operators. We limited the search to 1996, the year  
7  
8 132 one of the first known articles in this area was published.[27] Complementary methods to  
9  
10 133 identify studies included following up on citations via Scopus, scanning the reference lists of  
11  
12  
13 134 relevant papers and included articles, and checking for relevant studies in clinical trials.[25]

### 15 135 **Eligibility criteria**

17  
18 136 The main inclusion criterion was that the study, using empirical quantitative methods,  
19  
20 137 addressed the effectiveness of PACs. Specific eligibility criteria were: (a) published in English  
21  
22  
23 138 or Scandinavian language, (b) scientific publication of original research, (c) reported the  
24  
25 139 outcomes of PAC, (d) PAC consultation with the patient present, (e) randomised or non-  
26  
27  
28 140 randomised prospective controlled studies, and (f) newly established PAC. The following  
29  
30 141 were excluded: (a) editorials, discussions, and conference abstracts, (b) reviews, (c)  
31  
32  
33 142 instrument testing, (d) studies on children, and (e) retrospective studies.

### 35 143 **Study selection**

37  
38 144 All references identified in the search were transferred to EndNoteX9, where the duplicates  
39  
40 145 were removed. Subsequently, all unique references were transferred to the Covidence  
41  
42 146 screening tool.[28] Study eligibility was ascertained independently, first at the title and  
43  
44  
45 147 abstract level, and subsequently at the full text level. Three of the authors screened all the  
46  
47 148 articles (EWK, AO, MF). Inclusion was determined by consensus, and disagreements were  
48  
49  
50 149 resolved by consulting two other authors (RCB and TOT).

### 52 150 **Quality assessment**

54  
55 151 Risk of bias in studies were assessed using design-specific checklists. Given the  
56  
57 152 methodological similarity of the studies, only the Joanna Briggs Institute Critical appraisal  
58  
59 153 checklist for quasi-experimental studies was used.[29] Author EWK performed the risk of

1  
2  
3 154 bias assessment, and RCB confirmed its accuracy. Disagreements were resolved through  
4  
5 155 discussion with MF and AO. Each of the nine checklist questions was answered no, yes,  
6  
7  
8 156 unclear, or not applicable.  
9

### 10 157 **Data extraction and analysis**

11  
12  
13 158 Author EWK extracted data from each study onto a pre-designed Excel spreadsheet. All the  
14  
15 159 authors confirmed the accuracy, consistency, and completeness of the extracted data that  
16  
17 160 included publication details; study design; setting; and characteristics of the patients,  
18  
19 161 interventions, comparisons, and outcome (PICO). We requested information on the missing  
20  
21 162 data; however, received no response from the authors. If the PICO elements had been  
22  
23 163 sufficiently similar and statistical data were available, we had intended to conduct a meta-  
24  
25 164 analysis. However, the extracted data revealed substantial heterogeneity. Therefore, we  
26  
27 165 performed a narrative synthesis. We described the findings in text, stratified by outcome,  
28  
29 166 with descriptions of the effects of interventions for each study, classification of the effect  
30  
31 167 direction, and we looked across contributing studies to develop a summary of findings for  
32  
33 168 each outcome.[22]  
34  
35  
36  
37  
38  
39

### 40 169 **Patient and Public Involvement**

41  
42 170 Patients and/or the public were not involved in the design, conduct, reporting, or  
43  
44 171 dissemination plans of this research. However, the project was initiated by health  
45  
46 172 professionals.  
47  
48  
49

50 173

## 51 174 **RESULTS**

52  
53  
54 175 Figure 1. provides the details of the study selection process. A total of 2,981 records were  
55  
56 176 identified in the final search (2021). After removing duplicates, we screened 2,058 records  
57  
58  
59  
60

1  
2  
3 177 based on the title and abstract; 179 records passed the full-text screening. After applying the  
4  
5 178 inclusion criteria, seven studies were selected for the final analysis.

7  
8 179 **Overall characteristics of the studies**

9  
10 180 The seven studies are listed in Table 1. All seven studies were in English and were published  
11  
12  
13 181 between 2000 and 2017, with data collected between 1997 and 2015 (one study did not  
14  
15 182 report data collection information).[30] Based on the inclusion criteria, all were prospective  
16  
17  
18 183 controlled studies; however, no RCTs were found. There was one controlled before-after  
19  
20 184 study.[31] The remaining six studies had control groups; assessments followed PAC  
21  
22  
23 185 implementation, without baseline assessments. There were three two-group non-parallel  
24  
25 186 after-only studies,[32-34] and three two-group parallel after-only studies;[30] one had a  
26  
27  
28 187 matched control group[35] and one had three follow-up assessments of one arm.[36] One  
29  
30 188 study had only cancellation rate as prospective data.[32] The studies included 77,411  
31  
32  
33 189 patients.



190 **Table 1: Description of the included studies**

| Author, Year, Country                | Study design                     | Sampling time                          | Population                                                     | Intervention                                                      | Comparison                              | Outcomes                                                                                                              |
|--------------------------------------|----------------------------------|----------------------------------------|----------------------------------------------------------------|-------------------------------------------------------------------|-----------------------------------------|-----------------------------------------------------------------------------------------------------------------------|
| Farasatkish,2009[33]<br>Iran         | Two-group after study            | May 2007 through August 2007           | N=1716, open-heart surgery, ASA class III-IV                   | Pre-anaesthesia consultation clinic (3-10 days before surgery)    | Usual care (within 24 h of surgery)     | Cancellations                                                                                                         |
| Kamal,2011[34]<br>England            | Two-group after study            | April 2005 through April 2009          | N=1445, complex elective orthopaedic surgery, ASA class III-IV | Preoperative anaesthetic assessment clinic (timing not stated)    | Usual care (day of surgery)             | Admissions, length of stay, mortality, cost                                                                           |
| Kamau,2017[31]<br>Kenya              | CBA                              | August 2000, April 2001, November 2001 | N=51, elective non-cardiac surgery, ASA class not stated       | Pre-anaesthesia clinic consultation ( $\geq 48$ h before surgery) | Usual care (day before surgery)         | Anxiety (STAI score)                                                                                                  |
| Klopfenstein,2000[30]<br>Switzerland | Two-group after study (parallel) | No data                                | N=40, elective endoscopic urological surgery, ASA class I-III  | Pre-anaesthetic consultation (1-2 weeks before surgery)           | Usual care (the evening before surgery) | Anxiety (MAACL, VAS)                                                                                                  |
| Lee,2012[35]<br>China                | Two-group after study (parallel) | March 2007 through November 2009       | N=352, elective surgery, ASA class I-IV                        | Anaesthesia consultation clinic ( $\leq 3$ months before surgery) | Usual care (the evening before surgery) | Quality of recovery score, cost, cancellations, length of stay, satisfaction, anxiety (VAS), willingness to pay (WTP) |
| Mendes,2005[36]<br>Brazil            | Two-group after study (parallel) | April 2007 through June 2007           | N=52254, surgery, ASA class not stated                         | Preoperative outpatient evaluation clinic (timing not stated)     | Usual care (timing not stated)          | Cancellations, length of stay                                                                                         |

1  
2  
3  
4  
5  
6  
7  
8  
9  
10  
11  
12  
13  
14  
15  
16  
17  
18  
19  
20  
21  
22  
23  
24  
25  
26  
27  
28  
29  
30  
31  
32  
33  
34  
35  
36  
37  
38  
39  
40  
41  
42  
43  
44  
45  
46

|                                      |                          |               |                                                          |                                                                                     |                                    |               |
|--------------------------------------|--------------------------|---------------|----------------------------------------------------------|-------------------------------------------------------------------------------------|------------------------------------|---------------|
| van Klei,2002[32]<br>The Netherlands | Two-group<br>after study | November 2012 | N=21553,<br>elective surgery,<br>ASA class not<br>stated | Preoperative outpatient<br>evaluation clinic<br>(average 3 weeks<br>before surgery) | Usual care (day<br>before surgery) | Cancellations |
|--------------------------------------|--------------------------|---------------|----------------------------------------------------------|-------------------------------------------------------------------------------------|------------------------------------|---------------|

191

192 ASA: American Society of Anesthesiology; CBA: controlled before-after; MAACL: Multiple Affect Adjective Check List; STAI: State-Trait Anxiety  
193 Inventory; VAS: visual analogue scale; WTP: willingness to pay

For peer review only

1  
2  
3 194 Of the 77,411 patients in the studies, 9,626 and 15,531 patients were in the intervention and  
4  
5  
6 195 control groups, respectively. One study did not specify the number of patients in the  
7  
8 196 intervention and control groups, but only the total number of surgeries performed.[36] Five  
9  
10 197 studies reported data for sex, showing that 51% of the patients were women and 49% were  
11  
12 198 men (12,129 vs. 11,583).[30-33,35] There were more women than men in both the  
13  
14  
15 199 intervention (4,345 vs. 4,134) and control groups (7,784 vs. 7,449). Five studies reported  
16  
17 200 data for age showing that all patients were over 20 years of age[30-33,35] and four studies  
18  
19 201 had grouped within the American Society of Anesthesiology (ASA) category.[30,33-35]  
20  
21  
22 202  
23  
24 203 The patients were scheduled to undergo a variety of surgeries, including  
25  
26 204 orthopaedic,[31,32,34,35] urology,[30-32,35] general,[31,32,35] heart,[33]  
27  
28 205 gynaecology/obstetrics,[31,32,35] vascular surgery,[32] ophthalmology,[32]  
29  
30 206 maxillofacial/dental surgery,[31,32] and neurological surgery,[32] while one did not specify  
31  
32 207 the type.[36] In five studies, the type of anaesthesia was not specified,[31-34,36] and two  
33  
34 208 studies reported patients for general and/or regional supplement.[30,35]  
35  
36  
37 209  
38  
39 210 The patients included had previous anaesthetic experience in one study,[30] previous and no  
40  
41 211 previous anaesthetic experience in another,[31] and five studies did not report this data.[32-  
42  
43 212 36] Limited background characteristics of the patients were reported in two studies.[34,36]  
44  
45 213 One stated that the patients included had ASA 3 or 4 and a body mass index >40; however,  
46  
47 214 no ASA number, sex, or age was reported.[34] Mendes *et al.* did not report any background  
48  
49 215 characteristics of the included patients.[36]  
50  
51  
52  
53  
54  
55  
56  
57 216  
58  
59  
60

1  
2  
3 217 Considering the intervention, the PACs in all studies comprised an outpatient service  
4  
5 218 whereby patients were examined for medical conditions important for anaesthesia and  
6  
7  
8 219 informed regarding expectations on the day of surgery. Nevertheless, the terminology used  
9  
10 220 for PACs varied, as they served different surgical specialities and conducted pre-anaesthesia  
11  
12  
13 221 consultation from  $\geq 48$  h to  $\leq 3$  months before the surgery. The settings included a university  
14  
15 222 hospital (n=3),[31,35,36] teaching hospital (n=1),[32] medical centre (n=1),[33] and general  
16  
17 223 hospital (n=1);[34] one study did not specify the context.[30] The staff conducting the pre-  
18  
19 224 anaesthetic consultation also varied: in five studies, it was the anaesthesiologists,[30,32,34-  
20  
21 225 36] in the other studies, it was (also) the orthopaedic senior house officer,[34] consultant or  
22  
23 226 resident,[31] or physician.[33] In three studies, nurses were part of the team.[32,34,35] The  
24  
25 227 comparison in all studies was usual care, which generally involved a preoperative  
26  
27 228 anaesthetic evaluation of the admitted patients the day before the surgery.

### 229 **Description of risk of bias in the studies**

230 Figure 2. shows the results of the risk of bias assessment. In all seven included studies, the  
231 cause and effect were clear. Most of the studies measured outcomes similarly and used  
232 appropriate statistical analyses. Several studies had limitations of follow-up and similarity in  
233 care and participants. None of the patients had multiple pre-and post-measurements.

### 234 **Outcomes of the included studies**

235 The outcomes of the included studies are each described separately below.

#### 236 *Satisfaction*

237 One study reported satisfaction as an outcome.[35] The summarised patient satisfaction  
238 with the anaesthetic consultation score out of 100 showed that the patients in the PAC  
239 group were more satisfied (mean difference, 2.10%; 95% confidence interval [CI], 0.51–  
240 3.70%;  $p=0.01$ ).[35] There was no statistically significant difference between the two groups

1  
2  
3 241 in mean patient satisfaction with perioperative anaesthesia care score after surgery (mean  
4  
5 242 difference 0.01%,  $p=0.94$ ).[35] The quality of recovery (QoR) measure referred to the  
6  
7 243 patients' quality of recovery score.[37] The mean QoR score (range, 0–18) following  
8  
9 244 anaesthesia on the first day after surgery was similar between the intervention ( $13.17\pm 2.73$ )  
10  
11 245 and control ( $13.31\pm 2.65$ ) groups ( $p=0.67$ ).[35]

#### 15 246 *Anxiety*

17 247 Three studies reported anxiety.[30,31,35] Two studies reported the visual analogue scale  
18  
19 248 (VAS), one rated from zero (no anxiety) to ten (very high anxiety),[30] another used a 100-  
20  
21 249 mm horizontal line with 'not anxious at all' to 'extremely anxious'.[35] In one study, the  
22  
23 250 median VAS anxiety score was 3 (0–5) in the intervention group and 5 (2–8) in the control  
24  
25 251 group ( $p=0.0038$ ).[30] In another study, there were no significant differences between the  
26  
27 252 control and intervention groups for levels of anxiety (VAS), surgery (26 vs. 25, respectively,  
28  
29 253  $p=0.12$ ), and anaesthesia (20 vs. 19, respectively,  $p=0.60$ ).[35] The median Multiple Affect  
30  
31 254 Adjective Check List (MAACL) score, with possible range of scores from 0 to 21 (higher scores  
32  
33 255 indicating greater levels of anxiety), was 3 (0–9) in the intervention group and 6.5 (2–12) in  
34  
35 256 the control group ( $p=0.0053$ ).[30] The differences in the State-Trait Anxiety Index (STAI)  
36  
37 257 score, which comprised 40 questions rated on a four-point Likert scale, was 1.51 (95% CI:  
38  
39 258 1.02–2.02%,  $p=0.0051$ ).[31] The results on anxiety in these two studies were significant.  
40  
41 259 However, Kamau *et al.* found no differences on examining anxiety and the influences of sex,  
42  
43 260 duration of hospital stay, and prior anaesthesia experience.[31]

#### 51 261 *Mortality*

52 262 One study reported the mortality rates.[34] Patients attending the High Dependency Unit  
53  
54 263 (HDU), Intensive Care Unit (ICU), and Post-anaesthesia Care Unit (PACU) following complex  
55  
56  
57  
58  
59  
60

1  
2  
3 264 orthopaedic surgery had a significant reduction in mortality rate after being assessed at the  
4  
5 265 PAC, from 18 (6.1%) of 298 patients to 14 (1.2%) of 1147 patients ( $p=0.001$ ).[34]  
6  
7

#### 8 266 *Cancellation rate*

9

10 267 Four studies reported reduced cancellation rates following the establishment of a  
11  
12 268 PAC.[32,33,35,36] One of the included studies had 316 (2.0%) cancellations for medical  
13  
14 269 reasons before the introduction of PAC, and 79 (0.9%) after, with a difference of 1.02% (95%  
15  
16 270 CI, 0.31–1.31%). After adjustment, the odds ratio was 0.7 (95% CI, 0.5–0.9%).[32] The overall  
17  
18 271 cancellation of surgery reduced from 1027 (6.3%) to 393 (4.6%) following PAC introduction,  
19  
20 272 with a difference of 0.9% (95% CI, 0.3–1.0%).[32] Mendes *et al.*[36] found a decrease in  
21  
22 273 overall cancellations from year 1 (39.3%) to year 4 (15.9%),  $p \leq 0.05$ . In the first year of their  
23  
24 274 study, there were 469 cancellations per 10,639 surgeries performed. The following year, a  
25  
26 275 considerable increase above the baseline in the intervention group was observed, followed  
27  
28 276 by a progressive decrease in the last year with 391 cancellations per 10,397 surgeries  
29  
30 277 performed.[36] Farasatkish *et al.* reported that of the 1,716 patients studied, a mean of 15.1  
31  
32 278 % cancelled in the two groups. The cancellation rates in the control and intervention groups  
33  
34 279 were 16.8% (146 [number of cancellations]/866 [number of surgeries]) and 13.29%  
35  
36 280 (113/850) ( $p=0.046$ ), respectively. The most common reason for cancellation was  
37  
38 281 incomplete medical work-up; 51/146 (35%) in the control group and 32/113 (28%) in the  
39  
40 282 intervention group ( $p=0.03$ ).[33] Lee *et al.* found similar rates for surgery being cancelled on  
41  
42 283 the scheduled date for the intervention group compared with the control group (2.3% vs.  
43  
44 284 3.4%,  $p=0.75$ ).[35]  
45  
46  
47  
48  
49  
50  
51  
52  
53

54 285

#### 57 286 *Costs and willingness to pay*

58  
59  
60

1  
2  
3 287 Two studies reported the costs.[34,35] One study reported a total saving of £ 486.62 per  
4  
5  
6 288 patient after establishing a PAC.[34] Another reported a significantly lower preoperative cost  
7  
8 289 per patient in the intervention group compared with that of the control group (mean  
9  
10 290 difference, \$ 463; 95% CI, -\$648 to -\$278 per patient,  $p < 0.01$ ).[35] However, the mean  
11  
12  
13 291 difference in the total perioperative treatment cost was not significant, even after adjusting  
14  
15 292 for cancellation on the day of surgery costs.[35] Compared to the control group, the  
16  
17  
18 293 willingness to pay (WTP) among the intervention group patients was significantly more than  
19  
20 294 the median WTP (US \$13) for a clinic consultation at the PAC.[35]

### 22 295 *Length of stay*

23  
24  
25 296 The length of stay was reported in three studies.[34-36] Mendes *et al.*[36] found a significant  
26  
27 297 decrease in mean hospital stay of patients from 6.2 to 5.0 days ( $p \leq 0.001$ ) during the 4 years  
28  
29  
30 298 of this study. Kamal *et al.*[34] found a significant reduction in the length of stay in the HDU  
31  
32 299 from 2.1 days to 1.6 days ( $p = 0.01$ ), and in the ICU from 2.3 days to 1.9 days ( $p = 0.01$ ). In the  
33  
34  
35 300 last study, no significant changes were found in the median duration of postoperative stay  
36  
37 301 between the intervention and control groups.[35]

### 39 302 *Organisation planning and efficiency*

40  
41  
42 303 Organisation planning and efficiency have been reported in two studies.[34,36] One study  
43  
44 304 found statistically significant changes in the reduction of unplanned admissions to the PACU  
45  
46 305 (65/298 [22%], 111/1147 [10%],  $p = 0.001$ ), ICU (4/298 [1.3%], 4/1147 [0.4%],  $p = 0.01$ ), and  
47  
48  
49 306 HDU (4/298 [1.34%], 20/1147 [1.7%],  $p = 0.01$ ) after implementing a PAC.[34] The planned  
50  
51  
52 307 admissions in the ICU (4/298 [1.3%], 18/1147 [1.6%],  $p = 0.01$ ), and HDU (14/298 [4.7%],  
53  
54 308 85/1147 [7.4%],  $p = 0.1$ ) increased after implementing a PAC.[34] The number of PAC  
55  
56  
57 309 evaluations increased from 14,704 (year 1) to 413,990 (year 4) ( $p \leq 0.001$ ).[36] The number  
58  
59  
60

1  
2  
3 310 of outpatient procedures increased from 2,170 (year 1) to 1,943 (year 4) ( $p \leq 0.001$ ) and the  
4  
5 311 inpatient procedures decreased from 9,556 (year 1) to 8,449 (year 4) ( $p \leq 0.001$ ).[36]  
6  
7

8 312  
9 313 **DISCUSSION**

10  
11 314 This systematic review summarises the effectiveness of PACs in improving quality and safety  
12  
13  
14 315 of pre-anaesthetic patient care in general hospitals and determines the gaps in existing  
15  
16 316 knowledge for future research. Herein, we present the main results of the review and infer  
17  
18  
19 317 the implications for research and practice.  
20

21 318  
22  
23  
24 319 Seven studies met the inclusion criteria, and the main findings were reduction in the length  
25  
26 320 of stay and surgery cancellation rate in hospitals. However, the studies were of low quality,  
27  
28  
29 321 making it difficult to draw any conclusion. The evidence from our systematic review is  
30  
31 322 insufficient to conclude whether patients have reduced anxiety because of PAC. This is  
32  
33 323 because the included studies used different instruments for measuring anxiety levels, and  
34  
35  
36 324 the results could not be pooled.[38]  
37

38 325  
39  
40  
41 326 A major purpose of establishing a PAC in a hospital is to better prepare the patients for the  
42  
43 327 anticipated surgery. Healthcare professionals and policymakers are exploring strategies to  
44  
45  
46 328 reduce unnecessary investigations without compromising quality of care and patient  
47  
48 329 safety.[39] Transition of evidence-based interventions to the hospital systems can provide  
49  
50  
51 330 substantial benefits to patient care.[40] According to the ASA and the National Institute of  
52  
53 331 Health and Care Excellence, routine preoperative laboratory tests are not recommended for  
54  
55  
56 332 relatively healthy patients. Instead, they encourage patient and surgery- specific  
57  
58 333 investigations.[15,40] This recommendation is not always implemented in hospital protocols  
59  
60



1  
2  
3 334 or practice. An observational study showed that routine preoperative testing to predict  
4  
5 335 abnormalities found at least one abnormal test result in most of the relatively healthy  
6  
7  
8 336 patients. Only 0.67% of the abnormalities had a significant impact on changing the  
9  
10 337 perioperative management.[41] Blitz *et al.* argued that PACs should focus on early patient  
11  
12 338 engagement strategies, interdisciplinary team communication, detailed perioperative care  
13  
14 339 plans, and patient documentation using electronic health record, which should be open for  
15  
16 340 review by the perioperative team.[14] Furthermore, a previous study mentioned that the  
17  
18 341 risk factors are not only patient-related but also organisation-related,[7] and that some  
19  
20 342 hospitals have perioperative care teams that are better at identifying and relieving  
21  
22 343 perioperative complications.[42,43] Thus, the value of PACs lies in their ability to improve  
23  
24 344 the quality of the perioperative process by designing a more robust system for preoperative  
25  
26 345 assessment and preparation.[14] A narrative review found higher rates of morbidity and  
27  
28 346 mortality in non-operating room anaesthesia, and one of the main reasons was limited  
29  
30 347 preoperative evaluation.[6] In this systematic review, the assessment of PAC was  
31  
32 348 significantly associated with reduced mortality following complex orthopaedic surgery in  
33  
34 349 only one study.[34] Retrospective studies have reported similar results, but with different  
35  
36 350 surgeries.[14,44]

37  
38  
39  
40  
41  
42  
43  
44 351  
45  
46 352 Cancellation on the day of surgery has undesirable effects on both the patients and the  
47  
48 353 hospital system.[13] Late patient-related cancellations can totally or partially be  
49  
50 354 prevented,[45] if addressed during preoperative evaluations.[16] This has been confirmed by  
51  
52 355 only three studies in this systematic review that found a reduction in surgery cancellation  
53  
54 356 after implementing a PAC.[32,33,36] However, Lee *et al.* found no significant changes  
55  
56 357 between the intervention and control groups.[35] Mendes *et al.* found that the number of  
57  
58  
59  
60

1  
2  
3 358 cancellations for medical reasons after PAC implementation decreased in the first year of  
4  
5  
6 359 implementation. In the second and third years, they were high before the number dropped  
7  
8 360 to below baseline.[36] These conflicting findings indicate that hospitals operate in specific  
9  
10 361 contexts, with unique populations, processes, and microsystems, encountering unique  
11  
12  
13 362 obstacles, making implementation difficult. Patient-focused interventions should consider  
14  
15 363 barriers, facilitators, and interrelationships between systems, staff, and interventions to  
16  
17  
18 364 increase the likelihood of sustainable success.[46] Additionally, Kamal *et al.* indicated that  
19  
20 365 PACs lead to more planned admissions to the ICU, HDU, and PACU, which is more  
21  
22  
23 366 predictable for patients, staff, and administration.[34]  
24  
25 367  
26  
27 368 Another finding of this review was a significant reduction in the length of hospital stay  
28  
29  
30 369 following patients' examination in a PAC; however, a small number of studies with low  
31  
32  
33 370 quality were considered. Nevertheless, similar results were found in another systematic  
34  
35 371 review claiming that perioperative systems support the hospitals by addressing the expected  
36  
37 372 growth in the number and complexity of surgical procedures.[16] When patients are  
38  
39  
40 373 examined in the PAC and well-prepared with information, consultations, and tests, they  
41  
42 374 need not be hospitalised until the day of surgery. A survey on operated patients showed that  
43  
44  
45 375 given a choice, 75% do not wish admission to the hospital until the day of operation; a major  
46  
47 376 reason being shorter hospital stay.[47] An updated systematic review on the effectiveness of  
48  
49  
50 377 nurse-led preoperative assessment services for elective surgery found that the included  
51  
52 378 articles demonstrated a reduced length of stay; these studies had low methodological  
53  
54  
55 379 quality, and therefore, the authors could not conclude that this service leads to reduced  
56  
57 380 length of hospital stay.[17]  
58  
59 381  
60

### 382 **Strengths and limitations of the study**

383 The review was performed in duplicate or independently by two researchers, and consensus  
384 was reached through discussion. However, grey literature, such as government and  
385 institutional documents, was excluded and might be a limitation of this study. Since  
386 organisation of healthcare systems varies among countries, the type of staff who performed  
387 the preoperative assessment was not considered as an inclusion criterion. The European  
388 Society of Anaesthesiology guidelines recommend that the anaesthesiologists must  
389 complete the preoperative assessment while trained nurses or anaesthesia trainees should  
390 perform the screening.[8] A preoperative evaluation performed by an internist was  
391 associated with increased length of stay and increased postoperative mortality.[48] The  
392 results of this systematic review may have been affected by the heterogeneity in the types  
393 of staff performing the preoperative assessment.

394  
395 We exclusively included studies with high internal validity. Therefore, several retrospective  
396 studies were excluded. Nonetheless, as the remaining studies' risk of bias was fairly high,  
397 and they were heterogeneous, a meta-analysis was not statistically appropriate.[26] The  
398 included studies' designs could not rule out selection bias and confounders; thus, the  
399 strength of the evidence should be assessed cautiously. Many studies did not adjust for  
400 several confounders, which could be responsible for the observed effects. Several studies  
401 lacked descriptions of the methods used and the patients included, lowering transparency.  
402 The results are relevant to health care services, focusing on the well-being and safety of the  
403 patients.

### 405 **Implications for future research and practice**

1  
2  
3 406 This systematic review identified the ambiguity in the PAC interventions offered to the  
4  
5 407 intervention group. In many studies, it was evident that the methods used lacked clarity, and  
6  
7 408 high-quality research is needed in this field. The included studies did not demonstrate earlier  
8  
9 409 surgical room entry time[49,50] or reduction in the number of preoperative tests for  
10  
11 410 patients attending the PAC, similar to the results of the retrospective studies.[27]  
12  
13 411 Other implications may include the organisation structure of different PACs and their  
14  
15 412 functioning. Additionally, the tests that should be part of the assessment at the PACs should  
16  
17 413 be investigated. The use of technology, such as streaming services, facilitates different  
18  
19 414 patient groups and might become crucial for reducing human contact and spread of  
20  
21 415 infection in context of coronavirus disease 2019.  
22  
23  
24  
25  
26  
27

## 28 416 **CONCLUSION**

29  
30 417 PAC use has reduced the length of stay and surgery cancellation rate at hospitals. However,  
31  
32 418 the effectiveness of PAC, the major review question, remains unclear, and requires further  
33  
34 419 research. There is a demand for high-quality studies capturing robust data describing the  
35  
36 420 quality of care and clinical outcomes for patients requiring anaesthesia. This requires  
37  
38 421 increased focus and funding for this specific area of health services research and could,  
39  
40 422 therefore, lead to implementation of PACs in health care services and improve patient safety  
41  
42 423 and perioperative care.  
43  
44  
45  
46

## 47 424 **Acknowledgement**

48  
49 425 We thank the librarian Ellen Sejerstedt, University of Agder, Kristiansand, for helping with  
50  
51 426 the search strategy and elimination of duplicate articles.  
52  
53

## 54 427 **Competing Interests**

55  
56 428 The authors declare that they have no conflict of interest.  
57  
58

## 59 429 **Data sharing statement**

1  
2  
3 430 All data relevant to the study are included within the article or have been uploaded within  
4  
5 431 supplemental files.

7  
8 432 **Funding**

9  
10 433 This research received no specific grant from any funding agency in the public, commercial  
11  
12 434 or not-for-profit sectors.

13  
14  
15 435 **Author contributions**

16  
17 436 EWK, MF, AO, and TOT: Study design

18  
19 437 EWK, MF, AO: Search and screening of the articles

20  
21 438 EWK: Data extraction

22  
23 439 MF, AO, RCB, and TOT: Control of data extraction

24  
25 440 EWK, MF, AO, and RCB: Quality assessment of the included articles

26  
27 441 EWK: Drafting of the manuscript

28  
29 442 MF, AO, RCB, and TOT: Contribution to and review of the final version of the manuscript

30  
31 443 MF, AO, RCB, and TOT: Supervised the study

32  
33 444 **References**

34  
35 445 1 Braz LG, Braz DG, Da Cruz DS, et al. Mortality in anesthesia: a systematic review.

36  
37 446 *Clinics (Sao Paulo)* 2009;64:999–1006. doi: [10.1590/S1807-59322009001000011](https://doi.org/10.1590/S1807-59322009001000011).

38  
39 447 2 Santos ML, Novaes CO, Iglesias AC. Epidemiological profile of patients seen in the

40  
41 448 pre-anesthetic assessment clinic of a university hospital. *Rev Bras Anesthesiol*

42  
43 449 2017;67:457–67. doi: [doi.org/10.1016/j.bjan.2016.06.002](https://doi.org/10.1016/j.bjan.2016.06.002).

44  
45 450 3 Amaya F, Shimamoto S, Matsuda M, et al. Preoperative anesthesia clinic in Japan: a

46  
47 451 nationwide survey of the current practice of preoperative anesthesia assessment. *J*

48  
49 452 *Anesth* 2015;29:175–9. doi: [10.1007/s00540-014-1918-3](https://doi.org/10.1007/s00540-014-1918-3) [Published online first:

50  
51 453 2014/09/30].

- 1  
2  
3 454 4 Whitaker DK, Brattebø G, Smith AF, et al. The Helsinki Declaration on Patient Safety  
4  
5  
6 455 in anaesthesiology: putting words into practice. *Best Pract Res Clin Anaesthesiol*  
7  
8 456 2011;25:277–90. doi: [10.1016/j.bpa.2011.02.001](https://doi.org/10.1016/j.bpa.2011.02.001).  
9
- 10 457 5 Bainbridge D, Martin J, Arango M, et al. Perioperative and anaesthetic-related  
11  
12 458 mortality in developed and developing countries: a systematic review and meta-  
13  
14 459 analysis. *Lancet* 2012;380:1075–81. doi: [10.1016/S0140-6736\(12\)60990-8](https://doi.org/10.1016/S0140-6736(12)60990-8).  
15  
16  
17 460 6 Herman AD, Jaruzel CB, Lawton S, et al. Morbidity, mortality, and systems safety in  
18  
19 461 non-operating room anaesthesia: a narrative review. *Br J Anaesth* 2021;127:729–44.  
20  
21 462 doi: [10.1016/j.bja.2021.07.007](https://doi.org/10.1016/j.bja.2021.07.007).  
22  
23  
24 463 7 Whitlock EL, Feiner JR, Chen LL. Perioperative mortality, 2010 to 2014: a  
25  
26 464 retrospective cohort study using the National anesthesia clinical outcomes registry.  
27  
28 465 *Anesthesiology* 2015;123:1312–21. doi: [10.1097/ALN.0000000000000882](https://doi.org/10.1097/ALN.0000000000000882).  
29  
30  
31 466 8 De Hert S, Staender S, Fritsch G, et al. Pre-operative evaluation of adults undergoing  
32  
33 467 elective noncardiac surgery: updated guideline from the European Society of  
34  
35 468 Anaesthesiology. *Eur J Anaesthesiol* 2018;35:407–65. doi:  
36  
37 469 [10.1097/EJA.0000000000000817](https://doi.org/10.1097/EJA.0000000000000817).  
38  
39  
40 470 9 Chan FW, Wong F, Cheung YS, et al. Utility of a preoperative assessment clinic in a  
41  
42 471 tertiary care hospital. *Hong Kong Med J* 2011;17:441–5 [Published online first:  
43  
44 472 2011/12/08].  
45  
46  
47 473 10 Gupta A, Gupta N. Setting up and functioning of a preanaesthetic clinic. *Indian J*  
48  
49 474 *Anaesth* 2010;54:504–7. doi: [10.4103/0019-5049.72638](https://doi.org/10.4103/0019-5049.72638).  
50  
51  
52 475 11 Hariharan S, Chen D, Merritt-Charles L. Evaluation of the utilization of the  
53  
54 476 preanaesthetic clinics in a university teaching hospital. *BMC Health Serv Res*  
55  
56 477 2006;6:59. doi: [10.1186/1472-6963-6-59](https://doi.org/10.1186/1472-6963-6-59) [Published online first: 2006/05/25].  
57  
58  
59  
60

- 1  
2  
3 478 12 Goldenberg E, Saffary R, Schmiesing C. New role for the anesthesia preoperative  
4  
5 479 clinic: helping to ensure that surgery is the right choice for patients with serious  
6  
7 480 illness. *Anesth Analg* 2019;129:311–15. doi: [10.1213/ANE.0000000000004178](https://doi.org/10.1213/ANE.0000000000004178).  
9
- 10 481 13 Emanuel A, Macpherseon R. The anaesthetic pre-admission clinic is effective in  
11  
12 482 minimising surgical cancellation rates. *Anaesth Intensive Care* 2013;41:90–4. doi:  
13  
14 483 [10.1177/0310057X1304100115](https://doi.org/10.1177/0310057X1304100115).  
16
- 17 484 14 Blitz JD, Kendale SM, Jain SK, et al. Preoperative evaluation clinic visit is associated  
18  
19 485 with decreased risk of in-hospital postoperative mortality. *Anesthesiology*  
20  
21 486 2016;125:280–94. doi: [10.1097/ALN.0000000000001193](https://doi.org/10.1097/ALN.0000000000001193) [Published online first:  
22  
23 487 2016/07/21].  
24  
25  
26  
27 488 15 Committee on Standards and Practice Parameters, Apfelbaum JL, Connis RT et al.  
28  
29 489 Practice advisory for preanesthesia evaluation: an updated report by the American  
30  
31 490 Society of Anesthesiologists Task Force on Preanesthesia Evaluation. *Anesthesiology*  
32  
33 491 2012;116:522–38. doi: [10.1097/ALN.0b013e31823c1067](https://doi.org/10.1097/ALN.0b013e31823c1067).  
34  
35  
36  
37 492 16 Lee A, Kerridge RK, Chui PT, et al. Perioperative Systems as a quality model of  
38  
39 493 perioperative medicine and surgical care. *Health Policy* 2011;102:214–22. doi:  
40  
41 494 [10.1016/j.healthpol.2011.05.009](https://doi.org/10.1016/j.healthpol.2011.05.009) [Published online first: 2011/06/18].  
42  
43  
44  
45 495 17 Hines S, Munday J, Kynoch K. Effectiveness of nurse-led preoperative assessment  
46  
47 496 services for elective surgery: a systematic review update. *JBI Database System Rev*  
48  
49 497 *Implement Rep* 2015;13:279–317. doi: [10.11124/jbisrir-2015-1996](https://doi.org/10.11124/jbisrir-2015-1996).  
50  
51
- 52 498 18 Delaney D, Bayley EW, Olszewsky P, et al. Parental satisfaction with pediatric  
53  
54 499 preoperative assessment and education in a presurgical Care Center. *J Perianesth*  
55  
56 500 *Nurs* 2015;30:290–300. doi: [10.1016/j.jopan.2014.04.004](https://doi.org/10.1016/j.jopan.2014.04.004).  
57  
58  
59  
60

- 1  
2  
3 501 19 Davidson S, McKendrick D, French T. Preassessment clinic interview and patient  
4  
5 502 anxiety. *Saudi J Anaesth* 2016;10:402–08. doi: [10.4103/1658-354X.177339](https://doi.org/10.4103/1658-354X.177339).  
6  
7  
8 503 20 Turunen E, Miettinen M, Setälä L, et al. The impact of a structured preoperative  
9  
10 504 protocol on day of surgery cancellations. *J Clin Nurs* 2018;27:288–305. doi:  
11  
12 [10.1111/jocn.13896](https://doi.org/10.1111/jocn.13896).  
13 505  
14  
15 506 21 Holt NF, Silverman DG, Prasad R, et al. Preanesthesia clinics, information  
16  
17 507 management, and operating room delays: results of a survey of practicing  
18  
19 508 anesthesiologists. *Anesth Analg* 2007;104:615–18. doi:  
20  
21 [10.1213/01.ane.0000255253.62668.3a](https://doi.org/10.1213/01.ane.0000255253.62668.3a).  
22 509  
23 510 22 <http://www.training.cochrane.org/handbook> (Accessed 08/12/2018), 2019 updated  
24  
25 511 July 2019.  
26  
27 512 23 Moher D, Liberati A, Tetzlaff J, et al. Preferred Reporting Items for Systematic  
28  
29 513 Reviews and Meta-Analyses: the PRISMA statement. *BMJ* 2009;339:b2535. doi:  
30  
31 [10.1136/bmj.b2535](https://doi.org/10.1136/bmj.b2535).  
32 514  
33  
34 515 24 Kristoffersen EW, Opsal A, Tveit TO, et al. The effect of preanaesthetic assessment  
35  
36 516 clinic: a systematic review of randomised and non-randomised prospective  
37  
38 517 controlled studies. *Prospero* 2019;CRD42019137724.  
39  
40 518 25 Booth A, Sutton A, Papaioannou D. Systematic approaches to a successful literature  
41  
42 519 review. *Los Angeles*. California: Sage 2016.  
43  
44 520 26 Møller AM, Myles PS. What makes a good systematic review and meta-analysis? *Br J*  
45  
46 521 *Anaesth* 2016;117:428–30. doi: [10.1093/bja/aew264](https://doi.org/10.1093/bja/aew264).  
47  
48 522 27 Fischer SP. Development and effectiveness of an anesthesia preoperative evaluation  
49  
50 523 clinic in a teaching hospital. *Anesthesiology* 1996;85:196–206. doi:  
51  
52 [10.1097/00000542-199607000-00025](https://doi.org/10.1097/00000542-199607000-00025) [Published online first: 1996/07/01].  
53 524  
54  
55  
56  
57  
58  
59  
60



- 1  
2  
3 525 28 <https://www.covidence.org/reviews/active> (Accessed 29/09/2018).  
4  
5  
6 526 29 Tufanaru C, Munn Z, Aromataris E, et al. Systematic review of effectiveness. JBI  
7  
8 527 Manual for evidence synthesis. In: Aromataris E, Munn Z, eds.: *JBI Manual for*  
9  
10 528 *evidence synthesis 2020*.  
11  
12  
13 529 30 Klopfenstein CE, Forster A, Van Gessel E. Anesthetic assessment in an outpatient  
14  
15 530 consultation clinic reduces preoperative anxiety. *Can J Anaesth* 2000;47:511–5. doi:  
16  
17 531 [10.1007/BF03018941](https://doi.org/10.1007/BF03018941) [Published online first: 2000/06/30].  
18  
19  
20 532 31 Kamau A, Mung'ayi V, Yonga G. The effect of a preanaesthesia clinic consultation on  
21  
22 533 adult patient anxiety at a tertiary hospital in Kenya: a cohort study. *Afr Health Sci*  
23  
24 534 2017;17:138–46. doi: [10.4314/ahs.v17i1.18](https://doi.org/10.4314/ahs.v17i1.18) [Published online first: 2017/10/14].  
25  
26  
27 535 32 van Klei WA, Moons KG, Rutten CL, et al. The effect of outpatient preoperative  
28  
29 536 evaluation of hospital inpatients on cancellation of surgery and length of hospital  
30  
31 537 stay. *Anesth Analg* 2002;94:644–9; table of contents. doi: [10.1097/00000539-](https://doi.org/10.1097/00000539-200203000-00030)  
32  
33 538 [200203000-00030](https://doi.org/10.1097/00000539-200203000-00030) [Published online first: 2002/02/28].  
34  
35  
36  
37 539 33 Farasatkish R, Aghdaii N, Azarfarin R, et al. Can preoperative anesthesia consultation  
38  
39 540 clinic help to reduce operating room cancellation rate on the day of surgery? *Rawal*  
40  
41 541 *Med J* 2009;34:26–8.  
42  
43  
44 542 34 Kamal T, Conway RM, Littlejohn I, et al. The role of a multidisciplinary pre-assessment  
45  
46 543 clinic in reducing mortality after complex orthopaedic surgery. *Ann R Coll Surg Engl*  
47  
48 544 2011;93:149–51. doi: [10.1308/003588411X561026](https://doi.org/10.1308/003588411X561026).  
49  
50  
51  
52 545 35 Lee A, Chui PT, Chiu CH, et al. The cost-effectiveness of an outpatient anesthesia  
53  
54 546 consultation clinic before surgery: a matched Hong Kong cohort study. *Perioper Med*  
55  
56 547 *(Lond)* 2012;1:3. doi: [10.1186/2047-0525-1-3](https://doi.org/10.1186/2047-0525-1-3) [Published online first: 2012/01/01].  
57  
58  
59  
60

- 1  
2  
3 548 36 Mendes FF, Mathias LA, Duval Neto GF, et al. Impact of preoperative outpatient  
4  
5 549 evaluation clinic on performance indicators. *Rev Bras anesthesiol* 2005;55:175–87. doi:  
6  
7 [10.1590/S0034-70942005000200004](https://doi.org/10.1590/S0034-70942005000200004).  
8 550  
9  
10 551 37 Myles PS, Hunt JO, Nightingale CE, et al. Development and psychometric testing of a  
11  
12 552 quality of recovery score after general anesthesia and surgery in adults. *Anesth Analg*  
13  
14 553 1999;88:83–90. doi: [10.1097/00000539-199901000-00016](https://doi.org/10.1097/00000539-199901000-00016) [Published online first:  
15  
16 1999/01/23].  
17 554  
18  
19 555 38 Mitchell M. Anaesthesia type, gender and anxiety. *J Perioper Pract* 2013;23:41–7.  
20  
21 556 doi: [10.1177/175045891302300301](https://doi.org/10.1177/175045891302300301) [Published online first: 2013/04/17].  
22  
23 557 39 Karim HMR, Singha SK, Neema PK, et al. Information technology-based joint  
24  
25 558 preoperative assessment, risk stratification and its impact on patient management,  
26  
27 559 perioperative outcome, and cost 2021; 9:e130. doi: [10.15190/d.2020.9](https://doi.org/10.15190/d.2020.9).  
28  
29 560 40 *National guideline C. National Institute for Health and Care Excellence: clinical*  
30  
31 561 *guidelines. Preoperative tests (update): routine preoperative tests for elective*  
32  
33 562 *surgery*. London: National Institute for Health and Care Excellence, UK2016.  
34  
35 563 41 Reazaul Karim HM, Prakash A, Sahoo SK, et al. Abnormal routine pre-operative test  
36  
37 564 results and their impact on anaesthetic management: an observational study. *Indian*  
38  
39 565 *J Anaesth* 2018;62:23–8. doi: [10.4103/ija.IJA\\_223\\_17](https://doi.org/10.4103/ija.IJA_223_17).  
40  
41 566 42 Savoldelli GL. Perioperative care is a hazardous business: let's make it safer! *Trends*  
42  
43 567 *Anaesth Crit Care* 2016;7–8:3–4. doi: [10.1016/j.tacc.2016.05.003](https://doi.org/10.1016/j.tacc.2016.05.003).  
44  
45 568 43 Pearse RM, Moreno RP, Bauer P, et al. Mortality after surgery in Europe: a 7 day  
46  
47 569 cohort study. *Lancet* 2012;380:1059–65. doi: [10.1016/S0140-6736\(12\)61148-9](https://doi.org/10.1016/S0140-6736(12)61148-9).  
48  
49 570 44 Cantlay KL, Baker S, Parry A, et al. The impact of a consultant anaesthetist led pre-  
50  
51 571 operative assessment clinic on patients undergoing major vascular surgery.  
52  
53  
54  
55  
56  
57  
58  
59  
60

- 1  
2  
3 572 *Anaesthesia* 2006;61:234–9. doi: [10.1111/j.1365-2044.2005.04514.x](https://doi.org/10.1111/j.1365-2044.2005.04514.x) [Published  
4  
5  
6 573 online first: 2006/02/17].  
7  
8 574 45 Hänninen-Khoda L, Koljonen V, Ylä-Kotola T. Patient-related reasons for late surgery  
9  
10 575 cancellations in a plastic and reconstructive surgery department. *JPRAS Open*  
11  
12 576 2018;18:38–48. doi: [10.1016/j.jptra.2018.08.002](https://doi.org/10.1016/j.jptra.2018.08.002).  
13  
14  
15 577 46 Geerligs L, Rankin NM, Shepherd HL, et al. Hospital-based interventions: a systematic  
16  
17 578 review of staff-reported barriers and facilitators to implementation processes.  
18  
19 579 *Implement Sci* 2018;13:36. doi: [10.1186/s13012-018-0726-9](https://doi.org/10.1186/s13012-018-0726-9).  
20  
21  
22 580 47 Harries RL, Bradshaw CA, Jones EA, et al. To admit or not to admit on the morning of  
23  
24 581 surgery patients' perspectives on day of surgery admission. *J Perioper Pract*  
25  
26 582 2013;23:56–8. doi: [10.1177/175045891302300304](https://doi.org/10.1177/175045891302300304).  
27  
28  
29 583 48 Wijeyesundera DN, Austin PC, Beattie WS, et al. Outcomes and processes of care  
30  
31 584 related to preoperative medical consultation. *Arch Intern Med* 2010;170:1365–74.  
32  
33 585 doi: [10.1001/archinternmed.2010.204](https://doi.org/10.1001/archinternmed.2010.204).  
34  
35  
36 586 49 Ferschl MB, Tung A, Sweitzer BB, et al. Preoperative clinic visits reduce operating  
37  
38 587 room cancellations and delays. *Anesthesiology* 2005;103:855–59. doi:  
39  
40 588 [10.1097/00000542-200510000-00025](https://doi.org/10.1097/00000542-200510000-00025).  
41  
42  
43 589 50 Correll DJ, Bader AM, Hull MW, et al. Value of preoperative clinic visits in identifying  
44  
45 590 issues with potential impact on operating room efficiency. *Anesthesiology*  
46  
47 591 2006;105:1254–9; discussion 6A. doi: [10.1097/00000542-200612000-00026](https://doi.org/10.1097/00000542-200612000-00026)  
48  
49 592 [Published online first: 2006/11/24].  
50  
51  
52 593  
53  
54 594  
55  
56 595  
57  
58  
59  
60

1  
2  
3  
4  
5  
6  
7  
8  
9  
10  
11  
12  
13  
14  
15  
16  
17  
18  
19  
20  
21  
22  
23  
24  
25  
26  
27  
28  
29  
30  
31  
32  
33  
34  
35  
36  
37  
38  
39  
40  
41  
42  
43  
44  
45  
46  
47  
48  
49  
50  
51  
52  
53  
54  
55  
56  
57  
58  
59  
60

596 **Figure legends**

597

598 Figure 1: Preferred Reporting Items for Systematic Reviews and Meta-Analysis (PRISMA).

599 [23]

600 Figure 2: The Joanna Briggs Institute Critical appraisal checklist for quasi-experimental

601 studies was used for the risk of bias assessment. [29]

602

603

604

605

606

607

608

For peer review only

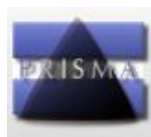

1  
2  
3  
4  
5  
6  
7  
8  
9  
10  
11  
12  
13  
14  
15  
16  
17  
18  
19  
20  
21  
22  
23  
24  
25  
26  
27  
28  
29  
30  
31  
32  
33  
34  
35  
36  
37  
38  
39  
40  
41  
42  
43  
44  
45  
46  
47  
48  
49  
50  
51  
52  
53  
54  
55  
56  
57  
58  
59  
60

Identification

Records identified through  
database searching  
(n=2981)  
  
(Embase n=1572, Cinahl n=209,  
Medline n=1200)

Screening

Duplicates removed  
(n=923)

Title and abstract screened  
(n=2058)

Records excluded  
(n=1879)

Eligibility

Full-text articles assessed  
for eligibility  
(n=179)

Full-text articles excluded,  
with reasons  
(n=173)

- 82 wrong study design
- 27 not a preoperative anaesthesia clinic
- 23 not a research paper
- 18 abstract/conference/ editorial letter
- 15 wrong interventions/ setting
- 2 full text not available
- 4 duplicates
- 2 wrong languages

Studies included in  
systematic review  
(n=6)

Included

Additional searching in  
references (=1)

Studies included in  
systematic review  
(n=7)

Figure 1: Preferred Reporting Items for Systematic Reviews and Meta-Analysis (PRISMA). [24]

|                   | Are cause and effect clear? | Are comparison participants similar? | Did comparison participants have similar care? | Was there a control group? | Were there multiple pre post measurements? | Was follow-up complete? | Were outcomes measured the same way? | Were outcomes measured in reliable way? | Was appropriate stat analysis used? |
|-------------------|-----------------------------|--------------------------------------|------------------------------------------------|----------------------------|--------------------------------------------|-------------------------|--------------------------------------|-----------------------------------------|-------------------------------------|
| Farasatkish 2009  | +                           | +                                    | ?                                              | +                          | -                                          | ?                       | +                                    | +                                       | +                                   |
| Kamal 2011        | +                           | ?                                    | ?                                              | +                          | -                                          | ?                       | ?                                    | ?                                       | ?                                   |
| Kamau 2017        | +                           | +                                    | -                                              | +                          | -                                          | +                       | +                                    | +                                       | +                                   |
| Klopfenstein 2000 | +                           | -                                    | +                                              | +                          | -                                          | ?                       | +                                    | +                                       | +                                   |
| Lee 2012          | +                           | +                                    | -                                              | +                          | -                                          | ?                       | +                                    | +                                       | +                                   |
| Mendes 2005       | +                           | ?                                    | ?                                              | +                          | -                                          | ?                       | ?                                    | ?                                       | +                                   |
| van Klei 2002     | +                           | +                                    | -                                              | +                          | -                                          | ?                       | +                                    | +                                       | +                                   |

Figure 2: The Joanna Briggs Institute Critical appraisal checklist for quasi-experimental studies was used for the risk of bias assessment. [30]

# Appendix 1: Search strategies

## Table of Content

|      |                                                        |   |
|------|--------------------------------------------------------|---|
| 1.   | <b>Database Search Strategies</b> .....                | 2 |
| 2.   | <b>Initial searches, 11 September 2018</b> .....       | 2 |
| 2.1. | <b>Main Databases</b> .....                            | 2 |
|      | Database: Embase, (Ovid).....                          | 2 |
|      | Database: Medline (Ovid) .....                         | 2 |
|      | Database: Cinahl Plus with Full Text (EBSCOhost).....  | 3 |
| 3.   | <b>Search update, 3 February 2020</b> .....            | 3 |
| 3.1. | <b>Main Databases</b> .....                            | 3 |
|      | Database: Embase (Ovid).....                           | 3 |
|      | Database: Medline (Ovid) .....                         | 4 |
|      | Database: Cinahl Plus with Full Text (EBSCO host)..... | 4 |
| 4.   | <b>Search update, 4 February 2021</b> .....            | 5 |
| 4.1. | <b>Main Databases</b> .....                            | 5 |
|      | Database: Embase (Ovid).....                           | 5 |
|      | Database: Medline (Ovid) .....                         | 5 |
|      | Database: Cinahl Plus with Full Text (EBSCO host)..... | 6 |

## 1. Database Search Strategies

The search mode for CINAHL was Boolean/Phrase. For those searches that are done without search fields - it is automatically searched in the standard fields that CINAHL uses, including words from title, summary, and subject headings.

Search 1 and Search 2 are with words in the title (TI in front of the keywords), however this have not been done with the other searches.

Embase and Medline have the same search mode because we are searching for words from title, summary, and subject headings.

## 2. Initial searches, 11 September 2018

### 2.1. Main Databases

*Database: Embase, (Ovid)*

Results: n=1287

Search:

- 1 ((pre-operativ\* or preoperativ\* or pre operativ\*) and (assessment\* or measurement\* or evaluat\*)).ti.
- 2 (clinic\* or unit\* or nurs\* or outpatient\* or ward\* or center\* or centre\*).ti.
- 3 1 and 2
- 4 ((preanaesthe\* or pre-anaesthe\* or pre anaesthe\* or pre-anesthe\* or preanesthe\* or pre anesthe\*) adj4 (assessment\* or measurement\* or evaluat\* or clinic\* or nurs\* or unit\* or outpatient\* or ward\* or center\* or centre\*).ti,ab. (689)
- 5 (((pre-admiss\* or preadmiss\*) adj4 (assessment\* or measurement\* or evaluat\* or clinic\* or unit\* or nurs\* or outpatient\* or ward\* or centre\* or center\*)) and (surg\* or anaesthe\* or anesthe\* or preoperativ\* or pre-operativ\* or preanaesthe\* or pre-anaesthe\* or pre anaesthe\* or pre-anesthe\* or preanesthe\* or pre anesthe\*).ti,ab.
- 6 ((anaesthe\* or anasthe\* or anesthe\*) adj4 outpatient\* adj4 clinic\*).ti,ab.
- 7 ((pre-admiss\* or preadmiss\*) adj4 (center\* or centre\*) adj4 (evaluat\* or assessment\* or measurement\*)).ti,ab.
- 8 or/3-7
- 9 limit 8 to yr="1996 -Current"
- 10 limit 9 to (conference abstracts or embase)

*Database: Medline (Ovid)*

Results: n=997

Search:

- 1 ((pre-operativ\* or preoperativ\* or pre operativ\*) and (assessment\* or measurement\* or evaluat\*)).ti.
- 2 clinic\* or unit\* or nurs\* or outpatient\* or ward\* or center\* or centre\*).ti.
- 3 1 and 2



1  
2  
3 4 ((preanaesthe\* or pre-anaesthe\* or pre anaesthe\* or pre-anesthe\* or  
4 preanesthe\* or pre anesthe\*) adj4 (assessment\* or measurement\* or evaluat\* or  
5 clinic\* or nurs\* or unit\* or outpatient\* or ward\* or center\* or centre\*)).ti,ab.  
6 5 (((pre-admiss\* or preadmiss\*) adj4 (assessment\* or measurement\* or evaluat\*  
7 or clinic\* or unit\* or nurs\* or outpatient\* or ward\* or centre\* or center\*)) and (surg\*  
8 or anaesthe\* or anesthe\* or preoperativ\* or pre-operativ\* or preanaesthe\* or pre-  
9 anaesthe\* or pre anaesthe\* or pre-anesthe\* or preanesthe\* or pre  
10 anesthe\*)).ti,ab.  
11 6 ((anaesthe\* or anasthe\* or anesthe\*) adj4 outpatient\* adj4 clinic\*).ti,ab.  
12 7 ((pre-admiss\* or preadmiss\*) adj4 (center\* or centre\*) adj4 (evaluat\* or  
13 assessment\* or measurement\*)).ti,ab.  
14 8 or/3-7  
15 9 limit 8 to yr="1996 -Current"  
16 10 remove duplicates from 9

17  
18  
19  
20  
21 *Database: Cinahl Plus with Full Text (EBSCOhost)*

22  
23 Results: n=132

24 Search:

25 1 TI ((pre-operativ\* or preoperativ\* or "pre operativ\*") AND (assessment\* or  
26 measurement\* or evaluat\*))  
27 2 TI (clinic\* or unit\* or nurs\* or outpatient\* or ward\* or center\* or centre\*)  
28 3 S1 AND S2  
29 4 (preanaesthe\* or pre-anaesthe\* or "pre anaesthe\*" or pre-anesthe\* or  
30 preanesthe\* or "pre anesthe\*") N3 (assessment\* or measurement\* or evaluat\* or  
31 clinic\* or nurs\* or unit\* or outpatient\* or ward\* or centre\* or center\*)  
32 5 ((pre-admiss\* or preadmiss\*) N3 (assessment\* or measurement\* or evaluat\* or  
33 clinic\* or unit\* or nurs\* or outpatient\* or ward\* or centre\* or center\*)) AND (surg\*  
34 or anaesthe\* or anesthe\* or preoperativ\* or "pre operativ\*" pre-operativ\* or  
35 preanaesthe\* or pre-anaesthe\* or pre-anesthe\* or preanesthe\* or "pre anesthe\*")  
36 6 (anaesthe\* or anasthe\* or anesthe\*) N3 outpatient\* N3 clinic\*  
37 7 (pre-admiss\* or preadmiss\*) N3 (center\* or centre\*) N3 (evaluat\* or  
38 assessment\* or measurement\*)  
39 8 S3 OR S4 OR S5 OR S6 OR S7  
40 9 S3 OR S4 OR S5 OR S6 OR S7 Limiters - Published Date: 19960101-  
41 20181231; Exclude MEDLINE records  
42  
43  
44  
45

### 46 3. Search update, 3 February 2020

#### 47 3.1. Main Databases

48  
49  
50  
51 *Database: Embase (Ovid)*

52  
53 Results: n=1453

54 Search:

55 1 ((pre-operativ\* or preoperativ\* or pre operativ\*) and (assessment\* or  
56 measurement\* or evaluat\*)).ti.  
57 2 (clinic\* or unit\* or nurs\* or outpatient\* or ward\* or center\* or centre\*).ti.  
58 3 1 and 2  
59  
60

1  
2  
3 4 ((preanaesthe\* or pre-anaesthe\* or pre anaesthe\* or pre-anesthe\* or  
4 preanesthe\* or pre anesthe\*) adj4 (assessment\* or measurement\* or evaluat\* or  
5 clinic\* or nurs\* or unit\* or outpatient\* or ward\* or center\* or centre\*).ti,ab.  
6 5 (((pre-admiss\* or preadmiss\*) adj4 (assessment\* or measurement\* or evaluat\*  
7 or clinic\* or unit\* or nurs\* or outpatient\* or ward\* or centre\* or center\*)) and (surg\*  
8 or anaesthe\* or anesthe\* or preoperativ\* or pre-operativ\* or preanaesthe\* or pre-  
9 anaesthe\* or pre anaesthe\* or pre-anesthe\* or preanesthe\* or pre  
10 anesthe\*).ti,ab.  
11 6 ((anaesthe\* or anasthe\* or anesthe\*) adj4 outpatient\* adj4 clinic\*).ti,ab.  
12 7 ((pre-admiss\* or preadmiss\*) adj4 (center\* or centre\*) adj4 (evaluat\* or  
13 assessment\* or measurement\*).ti,ab.  
14 8 or/3-7  
15 9 limit 8 to yr="1996 -Current"  
16 10 limit 9 to (conference abstracts or embase)

17  
18  
19  
20  
21  
22 *Database: Medline (Ovid)*

23  
24 Results: n=1105

25 Search:

26 1 ((pre-operativ\* or preoperativ\* or pre operativ\*) and (assessment\* or  
27 measurement\* or evaluat\*).ti.  
28 2 (clinic\* or unit\* or nurs\* or outpatient\* or ward\* or center\* or centre\*).ti.  
29 3 1 and 2  
30 4 ((preanaesthe\* or pre-anaesthe\* or pre anaesthe\* or pre-anesthe\* or  
31 preanesthe\* or pre anesthe\*) adj4 (assessment\* or measurement\* or evaluat\* or  
32 clinic\* or nurs\* or unit\* or outpatient\* or ward\* or center\* or centre\*).ti,ab.  
33 5 (((pre-admiss\* or preadmiss\*) adj4 (assessment\* or measurement\* or evaluat\*  
34 or clinic\* or unit\* or nurs\* or outpatient\* or ward\* or centre\* or center\*)) and (surg\*  
35 or anaesthe\* or anesthe\* or preoperativ\* or pre-operativ\* or preanaesthe\* or pre-  
36 anaesthe\* or pre anaesthe\* or pre-anesthe\* or preanesthe\* or pre  
37 anesthe\*).ti,ab.  
38 6 ((anaesthe\* or anasthe\* or anesthe\*) adj4 outpatient\* adj4 clinic\*).ti,ab.  
39 7 ((pre-admiss\* or preadmiss\*) adj4 (center\* or centre\*) adj4 (evaluat\* or  
40 assessment\* or measurement\*).ti,ab.  
41 8 or/3-7  
42 9 limit 8 to yr="1996 -Current"

43  
44  
45  
46  
47 *Database: Cinahl Plus with Full Text (EBSCO host)*

48 Results: n=166

49 Search:

50 1TI ((pre-operativ\* or preoperativ\* or "pre operativ\*") AND (assessment\* or  
51 measurement\* or evaluat\*))  
52 2 TI (clinic\* or unit\* or nurs\* or outpatient\* or ward\* or center\* or centre\*)  
53 3 S1 AND S2  
54 4 (preanaesthe\* or pre-anaesthe\* or "pre anaesthe\*" or pre-anesthe\* or  
55 preanesthe\* or "pre anesthe\*") N3 (assessment\* or measurement\* or evaluat\* or  
56 clinic\* or nurs\* or unit\* or outpatient\* or ward\* or centre\* or center\*)  
57  
58  
59  
60

5 ((pre-admiss\* or preadmiss\*) N3 (assessment\* or measurement\* or evaluat\* or  
 6 clinic\* or unit\* or nurs\* or outpatient\* or ward\* or centre\* or center\*)) AND (surg\*  
 7 or anaesthe\* or aneste\* or preoperativ\* or "pre operativ\*" pre-operativ\* or  
 8 preanaesthe\* or pre-anaesthe\* or pre-anesthe\* or preanesthe\* or "pre anesthe\*")  
 9 6 (anaesthe\* or anasthe\* or anesthe\*) N3 outpatient\* N3 clinic\* 23  
 10 (pre-admiss\* or preadmiss\*) N3 (center\* or centre\*) N3 (evalu\* or assessment\*  
 11 or measurement\*)  
 12 7 S3 OR S4 OR S5 OR S6 OR S7 487  
 13 8 S3 OR S4 OR S5 OR S6 OR S7 Limiters - Published Date: 19960101-;  
 14 Exclude MEDLINE records

#### 4. Search update, 4 February 2021

##### 4.1. Main Databases

*Database: Embase (Ovid)*

Results: n=1572

Search:

- 1 ((pre-operativ\* or preoperativ\* or pre operativ\*) and (assessment\* or  
 measurement\* or evaluat\*)).ti.
- 2 (clinic\* or unit\* or nurs\* or outpatient\* or ward\* or center\* or centre\*).ti.
- 3 1 and 2
- 4 ((preanaesthe\* or pre-anaesthe\* or pre anaesthe\* or pre-anesthe\* or  
 preanesthe\* or pre anesthe\*) adj4 (assessment\* or measurement\* or evaluat\* or  
 clinic\* or nurs\* or unit\* or outpatient\* or ward\* or center\* or centre\*).ti,ab.
- 5 (((pre-admiss\* or preadmiss\*) adj4 (assessment\* or measurement\* or evaluat\*  
 or clinic\* or unit\* or nurs\* or outpatient\* or ward\* or centre\* or center\*)) and (surg\*  
 or anaesthe\* or aneste\* or preoperativ\* or pre-operativ\* or preanaesthe\* or pre-  
 anaesthe\* or pre anaesthe\* or pre-anesthe\* or preanesthe\* or pre  
 anesthe\*).ti,ab.
- 6 ((anaesthe\* or anasthe\* or anesthe\*) adj4 outpatient\* adj4 clinic\*).ti,ab.
- 7 ((pre-admiss\* or preadmiss\*) adj4 (center\* or centre\*) adj4 (evalu\* or  
 assessment\* or measurement\*)).ti,ab.
- 8 or/3-7
- 9 limit 8 to yr="1996 -Current"
- 10 limit 9 to (conference abstracts or embase)

*Database: Medline (Ovid)*

Results: n=1200

Search:

- 1 ((pre-operativ\* or preoperativ\* or pre operativ\*) and (assessment\* or  
 measurement\* or evaluat\*)).ti.
- 2 (clinic\* or unit\* or nurs\* or outpatient\* or ward\* or center\* or centre\*).ti.
- 3 1 and 2
- 4 ((preanaesthe\* or pre-anaesthe\* or pre anaesthe\* or pre-anesthe\* or  
 preanesthe\* or pre anesthe\*) adj4 (assessment\* or measurement\* or evaluat\* or  
 clinic\* or nurs\* or unit\* or outpatient\* or ward\* or center\* or centre\*).ti,ab.

5 (((pre-admiss\* or preadmiss\*) adj4 (assessment\* or measurement\* or evaluat\*  
 6 or clinic\* or unit\* or nurs\* or outpatient\* or ward\* or centre\* or center\*)) and (surg\*  
 7 or anaesthe\* or anesthe\* or preoperativ\* or pre-operativ\* or preanaesthe\* or pre-  
 8 anaesthe\* or pre anaesthe\* or pre-anesthe\* or preanesthe\* or pre  
 9 anesthe\*).ti,ab.

6 ((anaesthe\* or anasthe\* or anesthe\*) adj4 outpatient\* adj4 clinic\*).ti,ab.

7 ((pre-admiss\* or preadmiss\*) adj4 (center\* or centre\*) adj4 (evaluat\* or  
 8 assessment\* or measurement\*).ti,ab. (4)

8 or/3-7

9 limit 8 to yr="1996 -Current"

10  
 11  
 12  
 13  
 14  
 15  
 16 *Database: Cinahl Plus with Full Text (EBSCO host)*

17  
 18 Results: n=209

19 Search:

20  
 21 1 TI ((pre-operativ\* or preoperativ\* or "pre operativ\*") AND (assessment\* or  
 22 measurement\* or evaluat\*))

23 2 TI (clinic\* or unit\* or nurs\* or outpatient\* or ward\* or center\* or centre\*)

24 3 S1 AND S2

25 4 (preanaesthe\* or pre-anaesthe\* or "pre anaesthe\*" or pre-anesthe\* or  
 26 preanesthe\* or "pre anesthe\*") N3 (assessment\* or measurement\* or evaluat\* or  
 27 clinic\* or nurs\* or unit\* or outpatient\* or ward\* or centre\* or center\*)

28  
 29 5 ((pre-admiss\* or preadmiss\*) N3 (assessment\* or measurement\* or evaluat\*  
 30 or clinic\* or unit\* or nurs\* or outpatient\* or ward\* or centre\* or center\*)) AND  
 31 (surg\* or anaesthe\* or anesthe\* or preoperativ\* or "pre operativ\*" pre-operativ\* or  
 32 preanaesthe\* or pre-anaesthe\* or pre-anesthe\* or preanesthe\* or "pre anesthe\*")

33 6 (anaesthe\* or anasthe\* or anesthe\*) N3 outpatient\* N3 clinic\* 30

34 7 (pre-admiss\* or preadmiss\*) N3 (center\* or centre\*) N3 (evaluat\* or  
 35 assessment\* or measurement\*)

36 8 S3 OR S4 OR S5 OR S6 OR S7

37 9 S3 OR S4 OR S5 OR S6 OR S7 Limiters - Published Date: 19960101-;

38 Exclude MEDLINE records  
 39  
 40  
 41  
 42  
 43  
 44  
 45  
 46  
 47  
 48  
 49  
 50  
 51  
 52  
 53  
 54  
 55  
 56  
 57  
 58  
 59  
 60

# Reporting checklist for systematic review and meta-analysis.

Based on the PRISMA guidelines.

## Instructions to authors

Complete this checklist by entering the page numbers from your manuscript where readers will find each of the items listed below.

Your article may not currently address all the items on the checklist. Please modify your text to include the missing information. If you are certain that an item does not apply, please write "n/a" and provide a short explanation.

Upload your completed checklist as an extra file when you submit to a journal.

In your methods section, say that you used the PRISMA reporting guidelines, and cite them as:

Moher D, Liberati A, Tetzlaff J, Altman DG, The PRISMA Group. Preferred Reporting Items for Systematic Reviews and Meta-Analyses: The PRISMA Statement

|                     | Reporting Item                                                                                                                                                                                                                                                                                                                | Page Number |
|---------------------|-------------------------------------------------------------------------------------------------------------------------------------------------------------------------------------------------------------------------------------------------------------------------------------------------------------------------------|-------------|
| <b>Title</b>        |                                                                                                                                                                                                                                                                                                                               |             |
|                     | <a href="#">#1</a> Identify the report as a systematic review, meta-analysis, or both.                                                                                                                                                                                                                                        | 1           |
| <b>Abstract</b>     |                                                                                                                                                                                                                                                                                                                               |             |
| Structured summary  | <a href="#">#2</a> Provide a structured summary including, as applicable: background; objectives; data sources; study eligibility criteria, participants, and interventions; study appraisal and synthesis methods; results; limitations; conclusions and implications of key findings; systematic review registration number | 2           |
| <b>Introduction</b> |                                                                                                                                                                                                                                                                                                                               |             |
| Rationale           | <a href="#">#3</a> Describe the rationale for the review in the context of what is already known.                                                                                                                                                                                                                             | 3-5         |

|    |                                    |                     |                                                                                                                                                                                                                                 |                        |
|----|------------------------------------|---------------------|---------------------------------------------------------------------------------------------------------------------------------------------------------------------------------------------------------------------------------|------------------------|
| 1  | Objectives                         | <a href="#">#4</a>  | Provide an explicit statement of questions being addressed with reference to participants, interventions, comparisons, outcomes, and study design (PICOS).                                                                      | 5                      |
| 2  |                                    |                     |                                                                                                                                                                                                                                 |                        |
| 3  |                                    |                     |                                                                                                                                                                                                                                 |                        |
| 4  |                                    |                     |                                                                                                                                                                                                                                 |                        |
| 5  |                                    |                     |                                                                                                                                                                                                                                 |                        |
| 6  | <b>Methods</b>                     |                     |                                                                                                                                                                                                                                 |                        |
| 7  |                                    |                     |                                                                                                                                                                                                                                 |                        |
| 8  |                                    |                     |                                                                                                                                                                                                                                 |                        |
| 9  | Protocol and registration          | <a href="#">#5</a>  | Indicate if a review protocol exists, if and where it can be accessed (e.g., Web address) and, if available, provide registration information including the registration number.                                                | 5                      |
| 10 |                                    |                     |                                                                                                                                                                                                                                 |                        |
| 11 |                                    |                     |                                                                                                                                                                                                                                 |                        |
| 12 |                                    |                     |                                                                                                                                                                                                                                 |                        |
| 13 |                                    |                     |                                                                                                                                                                                                                                 |                        |
| 14 | Eligibility criteria               | <a href="#">#6</a>  | Specify study characteristics (e.g., PICOS, length of follow-up) and report characteristics (e.g., years considered, language, publication status) used as criteria for eligibility, giving rational                            | 6                      |
| 15 |                                    |                     |                                                                                                                                                                                                                                 |                        |
| 16 |                                    |                     |                                                                                                                                                                                                                                 |                        |
| 17 |                                    |                     |                                                                                                                                                                                                                                 |                        |
| 18 |                                    |                     |                                                                                                                                                                                                                                 |                        |
| 19 |                                    |                     |                                                                                                                                                                                                                                 |                        |
| 20 |                                    |                     |                                                                                                                                                                                                                                 |                        |
| 21 | Information sources                | <a href="#">#7</a>  | Describe all information sources in the search (e.g., databases with dates of coverage, contact with study authors to identify additional studies) and date last searched.                                                      | 5,6                    |
| 22 |                                    |                     |                                                                                                                                                                                                                                 |                        |
| 23 |                                    |                     |                                                                                                                                                                                                                                 |                        |
| 24 |                                    |                     |                                                                                                                                                                                                                                 |                        |
| 25 |                                    |                     |                                                                                                                                                                                                                                 |                        |
| 26 |                                    |                     |                                                                                                                                                                                                                                 |                        |
| 27 |                                    |                     |                                                                                                                                                                                                                                 |                        |
| 28 | Search                             | <a href="#">#8</a>  | Present full electronic search strategy for at least one database, including any limits used, such that it could be repeated.                                                                                                   | 5,6 +<br>APPENDIX<br>1 |
| 29 |                                    |                     |                                                                                                                                                                                                                                 |                        |
| 30 |                                    |                     |                                                                                                                                                                                                                                 |                        |
| 31 |                                    |                     |                                                                                                                                                                                                                                 |                        |
| 32 |                                    |                     |                                                                                                                                                                                                                                 |                        |
| 33 | Study selection                    | <a href="#">#9</a>  | State the process for selecting studies (i.e., for screening, for determining eligibility, for inclusion in the systematic review, and, if applicable, for inclusion in the meta-analysis).                                     | 6                      |
| 34 |                                    |                     |                                                                                                                                                                                                                                 |                        |
| 35 |                                    |                     |                                                                                                                                                                                                                                 |                        |
| 36 |                                    |                     |                                                                                                                                                                                                                                 |                        |
| 37 |                                    |                     |                                                                                                                                                                                                                                 |                        |
| 38 |                                    |                     |                                                                                                                                                                                                                                 |                        |
| 39 |                                    |                     |                                                                                                                                                                                                                                 |                        |
| 40 | Data collection process            | <a href="#">#10</a> | Describe the method of data extraction from reports (e.g., piloted forms, independently by two reviewers) and any processes for obtaining and confirming data from investigators.                                               | 6-7                    |
| 41 |                                    |                     |                                                                                                                                                                                                                                 |                        |
| 42 |                                    |                     |                                                                                                                                                                                                                                 |                        |
| 43 |                                    |                     |                                                                                                                                                                                                                                 |                        |
| 44 |                                    |                     |                                                                                                                                                                                                                                 |                        |
| 45 |                                    |                     |                                                                                                                                                                                                                                 |                        |
| 46 | Data items                         | <a href="#">#11</a> | List and define all variables for which data were sought (e.g., PICOS, funding sources), and any assumptions and simplifications made.                                                                                          | 5-7                    |
| 47 |                                    |                     |                                                                                                                                                                                                                                 |                        |
| 48 |                                    |                     |                                                                                                                                                                                                                                 |                        |
| 49 |                                    |                     |                                                                                                                                                                                                                                 |                        |
| 50 |                                    |                     |                                                                                                                                                                                                                                 |                        |
| 51 |                                    |                     |                                                                                                                                                                                                                                 |                        |
| 52 | Risk of bias in individual studies | <a href="#">#12</a> | Describe methods used for assessing risk of bias in individual studies (including specification of whether this was done at the study or outcome level, or both), and how this information is to be used in any data synthesis. | 6-7                    |
| 53 |                                    |                     |                                                                                                                                                                                                                                 |                        |
| 54 |                                    |                     |                                                                                                                                                                                                                                 |                        |
| 55 |                                    |                     |                                                                                                                                                                                                                                 |                        |
| 56 |                                    |                     |                                                                                                                                                                                                                                 |                        |
| 57 |                                    |                     |                                                                                                                                                                                                                                 |                        |
| 58 |                                    |                     |                                                                                                                                                                                                                                 |                        |
| 59 |                                    |                     |                                                                                                                                                                                                                                 |                        |
| 60 |                                    |                     |                                                                                                                                                                                                                                 |                        |

|    |                    |                     |                                                                 |             |
|----|--------------------|---------------------|-----------------------------------------------------------------|-------------|
| 1  | Summary            | <a href="#">#13</a> | State the principal summary measures (e.g., risk ratio,         | N/A         |
| 2  | measures           |                     | difference in means).                                           |             |
| 3  |                    |                     |                                                                 |             |
| 4  | Planned            | <a href="#">#14</a> | Describe the methods of handling data and combining             | 7           |
| 5  | methods of         |                     | results of studies, if done, including measures of              |             |
| 6  | analysis           |                     | consistency (e.g., I <sup>2</sup> ) for each meta-analysis.     |             |
| 7  |                    |                     |                                                                 |             |
| 8  | Risk of bias       | <a href="#">#15</a> | Specify any assessment of risk of bias that may affect the      | 12          |
| 9  | across studies     |                     | cumulative evidence (e.g., publication bias, selective          |             |
| 10 |                    |                     | reporting within studies).                                      |             |
| 11 |                    |                     |                                                                 |             |
| 12 | Additional         | <a href="#">#16</a> | Describe methods of additional analyses (e.g., sensitivity or   | N/A         |
| 13 | analyses           |                     | subgroup analyses, meta-regression), if done, indicating        |             |
| 14 |                    |                     | which were pre-specified.                                       |             |
| 15 |                    |                     |                                                                 |             |
| 16 |                    |                     |                                                                 |             |
| 17 |                    |                     |                                                                 |             |
| 18 |                    |                     |                                                                 |             |
| 19 |                    |                     |                                                                 |             |
| 20 |                    |                     |                                                                 |             |
| 21 | <b>Results</b>     |                     |                                                                 |             |
| 22 |                    |                     |                                                                 |             |
| 23 | Study selection    | <a href="#">#17</a> | Give numbers of studies screened, assessed for eligibility,     | 8 + Figure  |
| 24 |                    |                     | and included in the review, with reasons for exclusions at      |             |
| 25 |                    |                     | each stage, ideally with a <a href="#">flow diagram</a> .       |             |
| 26 |                    |                     |                                                                 |             |
| 27 |                    |                     |                                                                 |             |
| 28 | Study              | <a href="#">#18</a> | For each study, present characteristics for which data were     | N/A         |
| 29 | characteristics    |                     | extracted (e.g., study size, PICOS, follow-up period) and       |             |
| 30 |                    |                     | provide the citation.                                           |             |
| 31 |                    |                     |                                                                 |             |
| 32 |                    |                     |                                                                 |             |
| 33 |                    |                     |                                                                 |             |
| 34 | Risk of bias       | <a href="#">#19</a> | Present data on risk of bias of each study and, if available,   | 12 + Figure |
| 35 | within studies     |                     | any outcome-level assessment (see Item 12).                     |             |
| 36 |                    |                     |                                                                 |             |
| 37 |                    |                     |                                                                 |             |
| 38 | Results of         | <a href="#">#20</a> | For all outcomes considered (benefits and harms), present,      | 12-16       |
| 39 | individual studies |                     | for each study: (a) simple summary data for each                |             |
| 40 |                    |                     | intervention group and (b) effect estimates and confidence      |             |
| 41 |                    |                     | intervals, ideally with a forest plot.                          |             |
| 42 |                    |                     |                                                                 |             |
| 43 |                    |                     |                                                                 |             |
| 44 | Synthesis of       | <a href="#">#21</a> | Present the main results of the review. If meta-analyses are    | 11-16       |
| 45 | results            |                     | done, include for each, confidence intervals and measures       |             |
| 46 |                    |                     | of consistency.                                                 |             |
| 47 |                    |                     |                                                                 |             |
| 48 |                    |                     |                                                                 |             |
| 49 |                    |                     |                                                                 |             |
| 50 | Risk of bias       | <a href="#">#22</a> | Present results of any assessment of risk of bias across        | N/A         |
| 51 | across studies     |                     | studies (see Item 15).                                          |             |
| 52 |                    |                     |                                                                 |             |
| 53 |                    |                     |                                                                 |             |
| 54 | Additional         | <a href="#">#23</a> | Give results of additional analyses, if done (e.g., sensitivity | N/A         |
| 55 | analysis           |                     | or subgroup analyses, meta-regression [see Item 16]).           |             |
| 56 |                    |                     |                                                                 |             |

## 57 Discussion

|    |                |                     |                                                                |       |
|----|----------------|---------------------|----------------------------------------------------------------|-------|
| 1  | Summary of     | <a href="#">#24</a> | Summarize the main findings, including the strength of         | 16-19 |
| 2  | Evidence       |                     | evidence for each main outcome; consider their relevance       |       |
| 3  |                |                     | to key groups (e.g., health care providers, users, and policy  |       |
| 4  |                |                     | makers                                                         |       |
| 5  |                |                     |                                                                |       |
| 6  |                |                     |                                                                |       |
| 7  |                |                     |                                                                |       |
| 8  | Limitations    | <a href="#">#25</a> | Discuss limitations at study and outcome level (e.g., risk of  | 19    |
| 9  |                |                     | bias), and at review level (e.g., incomplete retrieval of      |       |
| 10 |                |                     | identified research, reporting bias).                          |       |
| 11 |                |                     |                                                                |       |
| 12 |                |                     |                                                                |       |
| 13 | Conclusions    | <a href="#">#26</a> | Provide a general interpretation of the results in the context | 20    |
| 14 |                |                     | of other evidence, and implications for future research.       |       |
| 15 |                |                     |                                                                |       |
| 16 |                |                     |                                                                |       |
| 17 | <b>Funding</b> |                     |                                                                |       |
| 18 |                |                     |                                                                |       |
| 19 | Funding        | <a href="#">#27</a> | Describe sources of funding or other support (e.g., supply     | 21    |
| 20 |                |                     | of data) for the systematic review; role of funders for the    |       |
| 21 |                |                     | systematic review.                                             |       |
| 22 |                |                     |                                                                |       |
| 23 |                |                     |                                                                |       |

24 None The PRISMA checklist is distributed under the terms of the Creative Commons Attribution  
25 License CC-BY. This checklist can be completed online using <https://www.goodreports.org/>, a tool  
26 made by the [EQUATOR Network](#) in collaboration with [Penelope.ai](#)  
27  
28  
29  
30  
31  
32  
33  
34  
35  
36  
37  
38  
39  
40  
41  
42  
43  
44  
45  
46  
47  
48  
49  
50  
51  
52  
53  
54  
55  
56  
57  
58  
59  
60



# BMJ Open

## Effectiveness of pre-anaesthetic assessment clinic: A systematic review of randomised and non-randomised prospective controlled studies

|                                 |                                                                                                                                                                                                                                                                                                                                                   |
|---------------------------------|---------------------------------------------------------------------------------------------------------------------------------------------------------------------------------------------------------------------------------------------------------------------------------------------------------------------------------------------------|
| Journal:                        | <i>BMJ Open</i>                                                                                                                                                                                                                                                                                                                                   |
| Manuscript ID                   | bmjopen-2021-054206.R3                                                                                                                                                                                                                                                                                                                            |
| Article Type:                   | Original research                                                                                                                                                                                                                                                                                                                                 |
| Date Submitted by the Author:   | 01-Apr-2022                                                                                                                                                                                                                                                                                                                                       |
| Complete List of Authors:       | Kristoffersen, Eirunn; University of Agder, Department of Health and Nursing Science<br>Opsal, Anne; University of Agder, Department of Health and Nursing Science<br>Tveit, Tor; University of Agder, Department of Health and Nursing Science<br>Berg , Rigmor C ; Norwegian Institute of Public Health<br>Fossum, Mariann; University of Agder |
| <b>Primary Subject Heading</b>: | Anaesthesia                                                                                                                                                                                                                                                                                                                                       |
| Secondary Subject Heading:      | Surgery, Nursing, Health services research                                                                                                                                                                                                                                                                                                        |
| Keywords:                       | Adult anaesthesia < ANAESTHETICS, Health & safety < HEALTH SERVICES ADMINISTRATION & MANAGEMENT, Quality in health care < HEALTH SERVICES ADMINISTRATION & MANAGEMENT, Adult surgery < SURGERY                                                                                                                                                    |
|                                 |                                                                                                                                                                                                                                                                                                                                                   |

SCHOLARONE™  
Manuscripts



I, the Submitting Author has the right to grant and does grant on behalf of all authors of the Work (as defined in the below author licence), an exclusive licence and/or a non-exclusive licence for contributions from authors who are: i) UK Crown employees; ii) where BMJ has agreed a CC-BY licence shall apply, and/or iii) in accordance with the terms applicable for US Federal Government officers or employees acting as part of their official duties; on a worldwide, perpetual, irrevocable, royalty-free basis to BMJ Publishing Group Ltd ("BMJ") its licensees and where the relevant Journal is co-owned by BMJ to the co-owners of the Journal, to publish the Work in this journal and any other BMJ products and to exploit all rights, as set out in our [licence](#).

The Submitting Author accepts and understands that any supply made under these terms is made by BMJ to the Submitting Author unless you are acting as an employee on behalf of your employer or a postgraduate student of an affiliated institution which is paying any applicable article publishing charge ("APC") for Open Access articles. Where the Submitting Author wishes to make the Work available on an Open Access basis (and intends to pay the relevant APC), the terms of reuse of such Open Access shall be governed by a Creative Commons licence – details of these licences and which [Creative Commons](#) licence will apply to this Work are set out in our licence referred to above.

Other than as permitted in any relevant BMJ Author's Self Archiving Policies, I confirm this Work has not been accepted for publication elsewhere, is not being considered for publication elsewhere and does not duplicate material already published. I confirm all authors consent to publication of this Work and authorise the granting of this licence.

1  
2  
3 1 **Effectiveness of pre-anaesthetic assessment clinic: A systematic review of randomised and**  
4  
5 2 **non-randomised prospective controlled studies**  
6  
7

8 3  
9  
10 4 Eirunn Wallevik Kristoffersen<sup>1,2</sup> \*, Anne Opsal<sup>1</sup>, Tor Oddbjørn Tveit<sup>1,2,3</sup>, Rigmor C Berg<sup>4,5</sup>,  
11  
12 5 Mariann Fossum<sup>1</sup>  
13  
14

15 6  
16  
17 7 <sup>1</sup>Department of Health and Nursing Science, University of Agder, Grimstad/Kristiansand,  
18  
19 8 Norway  
20  
21

22 9 <sup>2</sup>Department of Anaesthesiology and Intensive Care, Sørlandet Hospital, Kristiansand,  
23  
24 10 Norway  
25  
26

27 11 <sup>3</sup>Department of Technology and e-Health, Sørlandet Hospital, Kristiansand, Norway  
28  
29

30 12 <sup>4</sup>Department of Community Medicine, University of Tromsø, Tromsø, Norway  
31  
32

33 13 <sup>5</sup>Norwegian Institute of Public Health, Oslo, Norway  
34  
35

36 14  
37 15 \*Corresponding author:  
38

39 16 Eirunn Wallevik Kristoffersen  
40

41 17 Department of Health and Nursing Science, University of Agder, Grimstad/Kristiansand,  
42  
43 18 Norway  
44  
45

46 19 E-mail: eirunn.w.kristoffersen@uia.no  
47  
48  
49

50 20  
51 21 Word count: 4156  
52  
53

54 22  
55

56 23  
57  
58  
59  
60

1  
2  
3 24 **ABSTRACT**

4  
5 25 **Objectives:** The aim of this systematic review was to examine the effectiveness of pre-  
6  
7 26 anaesthesia assessment clinics (PACs) in improving the quality and safety of perioperative  
8  
9 27 patient care.

10  
11 28 **Design:** Systematic review.

12  
13 29 **Data sources:** The electronic databases CINAHL Plus with Full Text (EBSCOhost), Medline,  
14  
15 30 and Embase (OvidSP) were systematically searched on 11 September 2018  
16  
17 31 and updated on 3 February 2020 and 4 February 2021.

18  
19 32 **Eligibility criteria:** The inclusion criteria for this study were studies published in English or  
20  
21 33 Scandinavian language and scientific original research that included randomised or non-  
22  
23 34 randomised prospective controlled studies. Additionally, studies that reported the outcomes  
24  
25 35 from a PAC consultation with the patient present were included.

26  
27 36 **Data extraction and synthesis:** Titles, abstracts, and full texts were screened by a team of  
28  
29 37 three authors. Risk of bias was assessed using the Joanna Briggs Institute critical appraisal  
30  
31 38 checklist for quasi-experimental studies. Data extraction was performed by one author and  
32  
33 39 checked by four other authors. Results were synthesised narratively owing to the  
34  
35 40 heterogeneity of the included studies.

36  
37 41 **Results:** Seven prospective controlled studies on the effectiveness of PACs, were included.  
38  
39 42 Three studies reported a significant reduction in the length of hospital stay and two studies  
40  
41 43 reported a significant reduction in cancellation of surgery for medical reasons when patients  
42  
43 44 were seen in the PAC. In addition, the included studies presented mixed results regarding  
44  
45 45 anxiety in patients. Most studies had a high risk of bias.

46  
47 46 **Conclusion:** This systematic review demonstrated a reduction in the length of hospital stay  
48  
49 47 and cancellation of surgery when the patients had been assessed in the PAC. There is a need  
50  
51 48 for high-quality prospective studies to gain a deeper understanding of the effectiveness of  
52  
53 49 PACs.

54  
55 50 **PROSPERO registration number:** CRD42019137724  
56  
57 51

58  
59 52 **Keywords:** pre-anaesthetic assessment clinic, preoperative care, quality, safety, systematic  
60  
53 review  
54  
55  
56  
57  
58  
59  
60

### Strengths and limitations of this study

- An extensive database search was conducted with no limitations on outcomes and the type of pre-anaesthetic assessment clinic.
- Only randomised or non-randomised prospective controlled studies were included.
- The Joanna Briggs Institute Critical appraisal checklist for quasi-experimental studies was used.
- The included studies were heterogeneous and had a high risk of bias, which is a major limitation of this review.

### INTRODUCTION

Anaesthesia is crucial in surgery. However, it may activate physiological changes that increase morbidity and mortality,[1] depending on the patients' preoperative health status and age.[2] Hospitals treat patients with complex, comorbid healthcare problems, undergoing progressively extensive surgeries and interventions.[3,4] To ensure the quality and safety of anaesthesia and surgery, precise knowledge of the clinical characteristics of patients is critical to the perioperative management.[2] Over the past 50 years, perioperative mortality, including anaesthesia-related mortality, has declined, which is significant in developed countries,[1,5] mainly because of new anaesthetics, improved monitoring equipment and training, availability of recovery rooms, and improved airway management.[4] However, a previous review found higher rates of morbidity and mortality in non-operating room anaesthesia, which was attributed to limited preoperative evaluation.[6] A retrospective study found significant associations between perioperative mortality and age < 1 year or > 65 years, American Society of Anesthesiologists Physical Status Classification System (ASA), emergency case status, and operative start time after

1  
2  
3 84 6:00 PM.[7] This might indicate that risk factors are both patient- and surgery-related and  
4  
5 85 may be linked to organisational structures.[8]  
6  
7  
8  
9 86 Currently, an increasing number of pre-anaesthesia assessment clinics (PACs) support  
10  
11 87 hospitals internationally in handling the rising number of patients and complexity of surgical  
12  
13 88 procedures.[9] The design of PACs differs critically based on location, organisational  
14  
15 89 structure, timing, and patient groups. They primarily function as a service unit for surgeons,  
16  
17 90 patients, and the anaesthetic team.[10] The PAC consultation, by the anaesthesiologist,  
18  
19 91 anaesthesia nurse, or both, is a globally recognised evaluation method and optimises the  
20  
21 92 patients' medical condition prior to surgery and anaesthesia.[2] Thus, it is essential for  
22  
23 93 secure anaesthetic practice since it detects anaesthesia-related risk factors and high-risk  
24  
25 94 patients, improves patient outcomes, prepares the patient physically and psychologically for  
26  
27 95 anaesthesia, and ensures the patient's most favourable condition for surgery and  
28  
29 96 anaesthesia.[11-13] This is primarily performed by interviewing and examining the patient;  
30  
31 97 reviewing previous medical, surgical and anaesthesia issues; evaluating current medication;  
32  
33 98 and obtaining and reviewing preoperative tests.[10] PACs also allow increased  
34  
35 99 communication between healthcare providers and coordination with postoperative  
36  
37 100 care.[14,15] Because of well-prepared patients and staff, several researchers have indicated  
38  
39 101 that with PAC, the number of surgical cancellations, length of hospital stay, laboratory tests,  
40  
41 102 and mortality rate have reduced.[7,16,17] Others assert that patients feel less anxious  
42  
43 103 regarding the subsequent anaesthetic and surgical processes and are highly satisfied with  
44  
45 104 the service with PAC consultations.[16,18,19]  
46  
47  
48  
49  
50  
51  
52  
53  
54  
55  
56 105 As Turunen *et al.* stated, research on PACs regarding costs, financial savings, the impact on  
57  
58 106 patient safety and quality of care, accuracy of the number of operative patients, and effect  
59  
60

1  
2  
3 107 on preoperative nursing levels, is scarce.[20] Survey results indicate that anaesthesiologists  
4  
5 108 perceive day of surgery delays due to missing information as common, even with PAC  
6  
7  
8 109 consultations.[21] This systematic review aimed to examine the effectiveness of PACs in  
9  
10 110 improving the quality and safety of perioperative patient care. Further, we aimed to  
11  
12 111 determine the gaps in existing knowledge for future research.  
13  
14  
15

## 16 112 **METHODS**

17  
18  
19 113 Our systematic review followed the guidelines in the Cochrane Handbook for Systematic  
20  
21 114 Reviews of Interventions[22] and was reported in accordance with the Preferred Reporting  
22  
23 115 Items for Systematic Reviews and Meta-Analyses (PRISMA) guidelines.[23] The protocol was  
24  
25 116 registered in PROSPERO: CRD42019137724.[24]  
26  
27

28  
29 117 The two review questions were:

- 30  
31 118 1. Is PAC effective in improving patient satisfaction and safety, while reducing anxiety?  
32  
33 119 2. Is PAC effective in reducing cancellation rate and cost of surgery, and improving the  
34  
35 120 efficiency of perioperative patient care?  
36  
37  
38

## 39 121 **Search strategies**

40  
41  
42 122 We performed a scoping search in different databases to identify the key terms.[25,26] The  
43  
44 123 final search was planned and conducted in close collaboration with the university librarian.

45  
46  
47 124 On 11 September 2018 we searched CINAHL Plus with Full Text (EBSCOhost), Medline, and  
48  
49 125 Embase (OvidSP) databases, which were updated on 3 February 2020 and 4 February 2021.

50  
51  
52 126 Considering the lack of subject headings (e.g., MeSH) for PAC, we combined text words, such  
53  
54 127 as 'pre-anaesthesia', 'nurse', 'surgery', 'anaesthesia', 'preoperative', 'assessment',  
55  
56 128 'measurement', 'evaluate', 'preadmission', 'centre', 'clinic', 'ward', 'unit', and 'outpatient'.

57  
58  
59 129 The searches are detailed in Appendix 1. The search mode in CINAHL was Boolean/Phase,  
60

1  
2  
3 130 which supports Boolean searching or exact phrase searching. For comprehensiveness, we  
4  
5  
6 131 used both the truncation and proximity operators. We limited the search to 1996, the year  
7  
8 132 one of the first known articles in this area was published.[27] Complementary methods to  
9  
10 133 identify studies included following up on citations via Scopus, scanning the reference lists of  
11  
12  
13 134 relevant papers and included articles, and checking for relevant studies in clinical trials.[25]

### 15 135 **Eligibility criteria**

17  
18 136 The main inclusion criterion was that the study, using empirical quantitative methods,  
19  
20 137 addressed the effectiveness of PACs. Specific eligibility criteria were: (a) published in English  
21  
22  
23 138 or Scandinavian language, (b) scientific publication of original research, (c) reported the  
24  
25 139 outcomes of PAC, (d) PAC consultation with the patient present, (e) randomised or non-  
26  
27  
28 140 randomised prospective controlled studies, and (f) newly established PAC. The following  
29  
30 141 were excluded: (a) editorials, discussions, and conference abstracts, (b) reviews, (c)  
31  
32  
33 142 instrument testing, (d) studies on children, and (e) retrospective studies.

### 35 143 **Study selection**

37  
38 144 All references identified in the search were transferred to EndNoteX9, where the duplicates  
39  
40 145 were removed. Subsequently, all unique references were transferred to the Covidence  
41  
42 146 screening tool.[28] Study eligibility was ascertained independently, first at the title and  
43  
44  
45 147 abstract level, and subsequently at the full text level. Three of the authors screened all the  
46  
47 148 articles (EWK, AO, MF). Inclusion was determined by consensus, and disagreements were  
48  
49  
50 149 resolved by consulting two other authors (RCB and TOT).

### 52 150 **Quality assessment**

54  
55 151 Risk of bias in studies were assessed using design-specific checklists. Given the  
56  
57 152 methodological similarity of the studies, only the Joanna Briggs Institute Critical appraisal  
58  
59 153 checklist for quasi-experimental studies was used.[29] Author EWK performed the risk of



1  
2  
3 154 bias assessment, and RCB confirmed its accuracy. Disagreements were resolved through  
4  
5 155 discussion with MF and AO. Each of the nine checklist questions was answered no, yes,  
6  
7  
8 156 unclear, or not applicable.  
9

### 10 157 **Data extraction and analysis**

11  
12  
13 158 Author EWK extracted data from each study onto a pre-designed Excel spreadsheet. All the  
14  
15 159 authors confirmed the accuracy, consistency, and completeness of the extracted data that  
16  
17 160 included publication details; study design; setting; and characteristics of the patients,  
18  
19 161 interventions, comparisons, and outcome (PICO). We requested information on the missing  
20  
21 162 data; however, received no response from the authors. If the PICO elements had been  
22  
23 163 sufficiently similar and statistical data were available, we had intended to conduct a meta-  
24  
25 164 analysis. However, the extracted data revealed substantial heterogeneity. Therefore, we  
26  
27 165 performed a narrative synthesis. We described the findings in text, stratified by outcome,  
28  
29 166 with descriptions of the effects of interventions for each study, classification of the effect  
30  
31 167 direction, and we looked across contributing studies to develop a summary of findings for  
32  
33 168 each outcome.[22]  
34  
35  
36  
37  
38  
39

### 40 169 **Patient and Public Involvement**

41  
42 170 Patients and/or the public were not involved in the design, conduct, reporting, or  
43  
44 171 dissemination plans of this research. However, the project was initiated by health  
45  
46 172 professionals.  
47  
48  
49

50 173

## 51 174 **RESULTS**

52  
53  
54 175 Figure 1. provides the details of the study selection process. A total of 2,981 records were  
55  
56 176 identified in the final search (2021). After removing duplicates, we screened 2,058 records  
57  
58  
59  
60

1  
2  
3 177 based on the title and abstract; 179 records passed the full-text screening. After applying the  
4  
5 178 inclusion criteria, seven studies were selected for the final analysis.

7  
8 179 **Overall characteristics of the studies**

9  
10 180 The seven studies are listed in Table 1. All seven studies were in English and were published  
11  
12  
13 181 between 2000 and 2017, with data collected between 1997 and 2015 (one study did not  
14  
15 182 report data collection information).[30] Based on the inclusion criteria, all were prospective  
16  
17  
18 183 controlled studies; however, no RCTs were found. There was one controlled before-after  
19  
20 184 study.[31] The remaining six studies had control groups; assessments followed PAC  
21  
22  
23 185 implementation, without baseline assessments. There were three two-group non-parallel  
24  
25 186 after-only studies,[32-34] and three two-group parallel after-only studies;[30] one had a  
26  
27  
28 187 matched control group[35] and one had three follow-up assessments of one arm.[36] One  
29  
30 188 study had only cancellation rate as prospective data.[32] The studies included 77,411  
31  
32  
33 189 patients.

190 **Table 1: Description of the included studies**

| Author, Year, Country                | Study design                     | Sampling time                          | Population                                                     | Intervention                                                      | Comparison                              | Outcomes                                                                                                              |
|--------------------------------------|----------------------------------|----------------------------------------|----------------------------------------------------------------|-------------------------------------------------------------------|-----------------------------------------|-----------------------------------------------------------------------------------------------------------------------|
| Farasatkish,2009[33]<br>Iran         | Two-group after study            | May 2007 through August 2007           | N=1716, open-heart surgery, ASA class III-IV                   | Pre-anaesthesia consultation clinic (3-10 days before surgery)    | Usual care (within 24 h of surgery)     | Cancellations                                                                                                         |
| Kamal,2011[34]<br>England            | Two-group after study            | April 2005 through April 2009          | N=1445, complex elective orthopaedic surgery, ASA class III-IV | Preoperative anaesthetic assessment clinic (timing not stated)    | Usual care (day of surgery)             | Admissions, length of stay, mortality, cost                                                                           |
| Kamau,2017[31]<br>Kenya              | CBA                              | August 2000, April 2001, November 2001 | N=51, elective non-cardiac surgery, ASA class not stated       | Pre-anaesthesia clinic consultation ( $\geq 48$ h before surgery) | Usual care (day before surgery)         | Anxiety (STAI score)                                                                                                  |
| Klopfenstein,2000[30]<br>Switzerland | Two-group after study (parallel) | No data                                | N=40, elective endoscopic urological surgery, ASA class I-III  | Pre-anaesthetic consultation (1-2 weeks before surgery)           | Usual care (the evening before surgery) | Anxiety (MAACL, VAS)                                                                                                  |
| Lee,2012[35]<br>China                | Two-group after study (parallel) | March 2007 through November 2009       | N=352, elective surgery, ASA class I-IV                        | Anaesthesia consultation clinic ( $\leq 3$ months before surgery) | Usual care (the evening before surgery) | Quality of recovery score, cost, cancellations, length of stay, satisfaction, anxiety (VAS), willingness to pay (WTP) |
| Mendes,2005[36]<br>Brazil            | Two-group after study (parallel) | April 2007 through June 2007           | N=52254, surgery, ASA class not stated                         | Preoperative outpatient evaluation clinic (timing not stated)     | Usual care (timing not stated)          | Cancellations, length of stay                                                                                         |

1  
2  
3  
4  
5  
6  
7  
8  
9  
10  
11  
12  
13  
14  
15  
16  
17  
18  
19  
20  
21  
22  
23  
24  
25  
26  
27  
28  
29  
30  
31  
32  
33  
34  
35  
36  
37  
38  
39  
40  
41  
42  
43  
44  
45  
46

|                                      |                          |               |                                                          |                                                                                     |                                    |               |
|--------------------------------------|--------------------------|---------------|----------------------------------------------------------|-------------------------------------------------------------------------------------|------------------------------------|---------------|
| van Klei,2002[32]<br>The Netherlands | Two-group<br>after study | November 2012 | N=21553,<br>elective surgery,<br>ASA class not<br>stated | Preoperative outpatient<br>evaluation clinic<br>(average 3 weeks<br>before surgery) | Usual care (day<br>before surgery) | Cancellations |
|--------------------------------------|--------------------------|---------------|----------------------------------------------------------|-------------------------------------------------------------------------------------|------------------------------------|---------------|

191

192 ASA: American Society of Anesthesiology; CBA: controlled before-after; MAACL: Multiple Affect Adjective Check List; STAI: State-Trait Anxiety  
193 Inventory; VAS: visual analogue scale; WTP: willingness to pay

For peer review only

1  
2  
3 194 Of the 77,411 patients in the studies, 9,626 and 15,531 patients were in the intervention and  
4  
5  
6 195 control groups, respectively. One study did not specify the number of patients in the  
7  
8 196 intervention and control groups, but only the total number of surgeries performed.[36] Five  
9  
10 197 studies reported data for sex, showing that 51% of the patients were women and 49% were  
11  
12 198 men (12,129 vs. 11,583).[30-33,35] There were more women than men in both the  
13  
14  
15 199 intervention (4,345 vs. 4,134) and control groups (7,784 vs. 7,449). Five studies reported  
16  
17 200 data for age showing that all patients were over 20 years of age[30-33,35] and four studies  
18  
19 201 had grouped within the American Society of Anesthesiology (ASA) category.[30,33-35]  
20  
21  
22 202  
23  
24 203 The patients were scheduled to undergo a variety of surgeries, including  
25  
26 204 orthopaedic,[31,32,34,35] urology,[30-32,35] general,[31,32,35] heart,[33]  
27  
28 205 gynaecology/obstetrics,[31,32,35] vascular surgery,[32] ophthalmology,[32]  
29  
30 206 maxillofacial/dental surgery,[31,32] and neurological surgery,[32] while one did not specify  
31  
32 207 the type.[36] In five studies, the type of anaesthesia was not specified,[31-34,36] and two  
33  
34 208 studies reported patients for general and/or regional supplement.[30,35]  
35  
36  
37 209  
38  
39 210 The patients included had previous anaesthetic experience in one study,[30] previous and no  
40  
41 211 previous anaesthetic experience in another,[31] and five studies did not report this data.[32-  
42  
43 212 36] Limited background characteristics of the patients were reported in two studies.[34,36]  
44  
45 213 One stated that the patients included had ASA 3 or 4 and a body mass index >40; however,  
46  
47 214 no ASA number, sex, or age was reported.[34] Mendes *et al.* did not report any background  
48  
49 215 characteristics of the included patients.[36]  
50  
51  
52  
53  
54  
55  
56  
57 216  
58  
59  
60

1  
2  
3 217 Considering the intervention, the PACs in all studies comprised an outpatient service  
4  
5 218 whereby patients were examined for medical conditions important for anaesthesia and  
6  
7  
8 219 informed regarding expectations on the day of surgery. Nevertheless, the terminology used  
9  
10 220 for PACs varied, as they served different surgical specialities and conducted pre-anaesthesia  
11  
12  
13 221 consultation from  $\geq 48$  h to  $\leq 3$  months before the surgery. The settings included a university  
14  
15 222 hospital (n=3),[31,35,36] teaching hospital (n=1),[32] medical centre (n=1),[33] and general  
16  
17 223 hospital (n=1);[34] one study did not specify the context.[30] The staff conducting the pre-  
18  
19  
20 224 anaesthetic consultation also varied: in five studies, it was the anaesthesiologists,[30,32,34-  
21  
22  
23 225 36] in the other studies, it was (also) the orthopaedic senior house officer,[34] consultant or  
24  
25 226 resident,[31] or physician.[33] In three studies, nurses were part of the team.[32,34,35] The  
26  
27 227 comparison in all studies was usual care, which generally involved a preoperative  
28  
29  
30 228 anaesthetic evaluation of the admitted patients the day before the surgery.

### 32 229 **Description of risk of bias in the studies**

34  
35 230 Figure 2. shows the results of the risk of bias assessment. In all seven included studies, the  
36  
37 231 cause and effect were clear. Most of the studies measured outcomes similarly and used  
38  
39  
40 232 appropriate statistical analyses. Several studies had limitations of follow-up and similarity in  
41  
42 233 care and participants. None of the patients had multiple pre-and post-measurements.

### 44 234 **Outcomes of the included studies**

46  
47 235 The outcomes of the included studies are each described separately below.

#### 49 236 *Satisfaction*

51  
52 237 One study reported satisfaction as an outcome.[35] The summarised patient satisfaction  
53  
54 238 with the anaesthetic consultation score out of 100 showed that the patients in the PAC  
55  
56  
57 239 group were more satisfied (mean difference, 2.10%; 95% confidence interval [CI], 0.51–  
58  
59 240 3.70%;  $p=0.01$ ).[35] There was no statistically significant difference between the two groups  
60

1  
2  
3 241 in mean patient satisfaction with perioperative anaesthesia care score after surgery (mean  
4  
5 242 difference 0.01%,  $p=0.94$ ).[35] The quality of recovery (QoR) measure referred to the  
6  
7 243 patients' quality of recovery score.[37] The mean QoR score (range, 0–18) following  
8  
9 244 anaesthesia on the first day after surgery was similar between the intervention ( $13.17\pm 2.73$ )  
10  
11 245 and control ( $13.31\pm 2.65$ ) groups ( $p=0.67$ ).[35]

#### 15 246 *Anxiety*

17 247 Three studies reported anxiety.[30,31,35] Two studies reported the visual analogue scale  
18  
19 248 (VAS), one rated from zero (no anxiety) to ten (very high anxiety),[30] another used a 100-  
20  
21 249 mm horizontal line with 'not anxious at all' to 'extremely anxious'.[35] In one study, the  
22  
23 250 median VAS anxiety score was 3 (0–5) in the intervention group and 5 (2–8) in the control  
24  
25 251 group ( $p=0.0038$ ).[30] In another study, there were no significant differences between the  
26  
27 252 control and intervention groups for levels of anxiety (VAS), surgery (26 vs. 25, respectively,  
28  
29 253  $p=0.12$ ), and anaesthesia (20 vs. 19, respectively,  $p=0.60$ ).[35] The median Multiple Affect  
30  
31 254 Adjective Check List (MAACL) score, with possible range of scores from 0 to 21 (higher scores  
32  
33 255 indicating greater levels of anxiety), was 3 (0–9) in the intervention group and 6.5 (2–12) in  
34  
35 256 the control group ( $p=0.0053$ ).[30] The differences in the State-Trait Anxiety Index (STAI)  
36  
37 257 score, which comprised 40 questions rated on a four-point Likert scale, was 1.51 (95% CI:  
38  
39 258 1.02–2.02%,  $p=0.0051$ ).[31] The results on anxiety in these two studies were significant.  
40  
41 259 However, Kamau *et al.* found no differences on examining anxiety and the influences of sex,  
42  
43 260 duration of hospital stay, and prior anaesthesia experience.[31]

#### 51 261 *Mortality*

52 262 One study reported the mortality rates.[34] Patients attending the High Dependency Unit  
53  
54 263 (HDU), Intensive Care Unit (ICU), and Post-anaesthesia Care Unit (PACU) following complex  
55  
56  
57  
58  
59  
60

1  
2  
3 264 orthopaedic surgery had a significant reduction in mortality rate after being assessed at the  
4  
5 265 PAC, from 18 (6.1%) of 298 patients to 14 (1.2%) of 1147 patients ( $p=0.001$ ).[34]  
6  
7

#### 8 266 *Cancellation rate*

9

10 267 Four studies reported reduced cancellation rates following the establishment of a  
11  
12 268 PAC.[32,33,35,36] One of the included studies had 316 (2.0%) cancellations for medical  
13  
14 269 reasons before the introduction of PAC, and 79 (0.9%) after, with a difference of 1.02% (95%  
15  
16 270 CI, 0.31–1.31%). After adjustment, the odds ratio was 0.7 (95% CI, 0.5–0.9%).[32] The overall  
17  
18 271 cancellation of surgery reduced from 1027 (6.3%) to 393 (4.6%) following PAC introduction,  
19  
20 272 with a difference of 0.9% (95% CI, 0.3–1.0%).[32] Mendes *et al.*[36] found a decrease in  
21  
22 273 overall cancellations from year 1 (39.3%) to year 4 (15.9%),  $p \leq 0.05$ . In the first year of their  
23  
24 274 study, there were 469 cancellations per 10,639 surgeries performed. The following year, a  
25  
26 275 considerable increase above the baseline in the intervention group was observed, followed  
27  
28 276 by a progressive decrease in the last year with 391 cancellations per 10,397 surgeries  
29  
30 277 performed.[36] Farasatkish *et al.* reported that of the 1,716 patients studied, a mean of 15.1  
31  
32 278 % cancelled in the two groups. The cancellation rates in the control and intervention groups  
33  
34 279 were 16.8% (146 [number of cancellations]/866 [number of surgeries]) and 13.29%  
35  
36 280 (113/850) ( $p=0.046$ ), respectively. The most common reason for cancellation was  
37  
38 281 incomplete medical work-up; 51/146 (35%) in the control group and 32/113 (28%) in the  
39  
40 282 intervention group ( $p=0.03$ ).[33] Lee *et al.* found similar rates for surgery being cancelled on  
41  
42 283 the scheduled date for the intervention group compared with the control group (2.3% vs.  
43  
44 284 3.4%,  $p=0.75$ ).[35]  
45  
46  
47  
48  
49  
50  
51  
52  
53

54 285

#### 57 286 *Costs and willingness to pay*

58  
59  
60



1  
2  
3 287 Two studies reported the costs.[34,35] One study reported a total saving of £ 486.62 per  
4  
5  
6 288 patient after establishing a PAC.[34] Another reported a significantly lower preoperative cost  
7  
8 289 per patient in the intervention group compared with that of the control group (mean  
9  
10 290 difference, \$ 463; 95% CI, -\$648 to -\$278 per patient,  $p < 0.01$ ).[35] However, the mean  
11  
12  
13 291 difference in the total perioperative treatment cost was not significant, even after adjusting  
14  
15 292 for cancellation on the day of surgery costs.[35] Compared to the control group, the  
16  
17  
18 293 willingness to pay (WTP) among the intervention group patients was significantly more than  
19  
20 294 the median WTP (US \$13) for a clinic consultation at the PAC.[35]

### 22 295 *Length of stay*

24  
25 296 The length of stay was reported in three studies.[34-36] Mendes *et al.*[36] found a significant  
26  
27 297 decrease in mean hospital stay of patients from 6.2 to 5.0 days ( $p \leq 0.001$ ) during the 4 years  
28  
29  
30 298 of this study. Kamal *et al.*[34] found a significant reduction in the length of stay in the HDU  
31  
32 299 from 2.1 days to 1.6 days ( $p = 0.01$ ), and in the ICU from 2.3 days to 1.9 days ( $p = 0.01$ ). In the  
33  
34  
35 300 last study, no significant changes were found in the median duration of postoperative stay  
36  
37 301 between the intervention and control groups.[35]

### 39 302 *Organisation planning and efficiency*

41  
42 303 Organisation planning and efficiency have been reported in two studies.[34,36] One study  
43  
44 304 found statistically significant changes in the reduction of unplanned admissions to the PACU  
45  
46 305 (65/298 [22%], 111/1147 [10%],  $p = 0.001$ ), ICU (4/298 [1.3%], 4/1147 [0.4%],  $p = 0.01$ ), and  
47  
48  
49 306 HDU (4/298 [1.34%], 20/1147 [1.7%],  $p = 0.01$ ) after implementing a PAC.[34] The planned  
50  
51  
52 307 admissions in the ICU (4/298 [1.3%], 18/1147 [1.6%],  $p = 0.01$ ), and HDU (14/298 [4.7%],  
53  
54 308 85/1147 [7.4%],  $p = 0.1$ ) increased after implementing a PAC.[34] The number of PAC  
55  
56  
57 309 evaluations increased from 14,704 (year 1) to 413,990 (year 4) ( $p \leq 0.001$ ).[36] The number  
58  
59  
60

1  
2  
3 310 of outpatient procedures increased from 2,170 (year 1) to 1,943 (year 4) ( $p \leq 0.001$ ) and the  
4  
5 311 inpatient procedures decreased from 9,556 (year 1) to 8,449 (year 4) ( $p \leq 0.001$ ).[36]  
6  
7

8 312  
9 313 **DISCUSSION**

10  
11 314 This systematic review summarises the effectiveness of PACs in improving quality and safety  
12  
13 315 of pre-anaesthetic patient care in general hospitals and determines the gaps in existing  
14  
15 316 knowledge for future research. Herein, we present the main results of the review and infer  
16  
17 317 the implications for research and practice.  
18  
19  
20

21 318  
22  
23 319 Seven studies met the inclusion criteria, and the main findings were reduction in the length  
24  
25 320 of stay and surgery cancellation rate in hospitals. However, the studies were of low quality,  
26  
27 321 making it difficult to draw any conclusion. The evidence from our systematic review is  
28  
29 322 insufficient to conclude whether patients have reduced anxiety because of PAC. This is  
30  
31 323 because the included studies used different instruments for measuring anxiety levels, and  
32  
33 324 the results could not be pooled.[38]  
34  
35  
36  
37  
38

39 325  
40  
41 326 A major purpose of establishing a PAC in a hospital is to better prepare the patients for the  
42  
43 327 anticipated surgery. Healthcare professionals and policymakers are exploring strategies to  
44  
45 328 reduce unnecessary investigations without compromising quality of care and patient  
46  
47 329 safety.[39] Transition of evidence-based interventions to the hospital systems can provide  
48  
49 330 substantial benefits to patient care.[40] According to the ASA and the National Institute of  
50  
51 331 Health and Care Excellence, routine preoperative laboratory tests are not recommended for  
52  
53 332 relatively healthy patients. Instead, they encourage patient and surgery- specific  
54  
55 333 investigations.[15,40] This recommendation is not always implemented in hospital protocols  
56  
57  
58  
59  
60

1  
2  
3 334 or practice. An observational study showed that routine preoperative testing to predict  
4  
5 335 abnormalities found at least one abnormal test result in most of the relatively healthy  
6  
7  
8 336 patients. Only 0.67% of the abnormalities had a significant impact on changing the  
9  
10 337 perioperative management.[41] Blitz *et al.* argued that PACs should focus on early patient  
11  
12 338 engagement strategies, interdisciplinary team communication, detailed perioperative care  
13  
14 339 plans, and patient documentation using electronic health record, which should be open for  
15  
16 340 review by the perioperative team.[14] Furthermore, a previous study mentioned that the  
17  
18 341 risk factors are not only patient-related but also organisation-related,[7] and that some  
19  
20 342 hospitals have perioperative care teams that are better at identifying and relieving  
21  
22 343 perioperative complications.[42,43] Thus, the value of PACs lies in their ability to improve  
23  
24 344 the quality of the perioperative process by designing a more robust system for preoperative  
25  
26 345 assessment and preparation.[14] A narrative review found higher rates of morbidity and  
27  
28 346 mortality in non-operating room anaesthesia, and one of the main reasons was limited  
29  
30 347 preoperative evaluation.[6] In this systematic review, the assessment of PAC was  
31  
32 348 significantly associated with reduced mortality following complex orthopaedic surgery in  
33  
34 349 only one study.[34] Retrospective studies have reported similar results, but with different  
35  
36 350 surgeries.[14,44]

37  
38  
39  
40  
41  
42  
43  
44 351  
45  
46 352 Cancellation on the day of surgery has undesirable effects on both the patients and the  
47  
48 353 hospital system.[13] Late patient-related cancellations can totally or partially be  
49  
50 354 prevented,[45] if addressed during preoperative evaluations.[16] This has been confirmed by  
51  
52 355 only three studies in this systematic review that found a reduction in surgery cancellation  
53  
54 356 after implementing a PAC.[32,33,36] However, Lee *et al.* found no significant changes  
55  
56 357 between the intervention and control groups.[35] Mendes *et al.* found that the number of  
57  
58  
59  
60

1  
2  
3 358 cancellations for medical reasons after PAC implementation decreased in the first year of  
4  
5  
6 359 implementation. In the second and third years, they were high before the number dropped  
7  
8 360 to below baseline.[36] These conflicting findings indicate that hospitals operate in specific  
9  
10 361 contexts, with unique populations, processes, and microsystems, encountering unique  
11  
12  
13 362 obstacles, making implementation difficult. Patient-focused interventions should consider  
14  
15 363 barriers, facilitators, and interrelationships between systems, staff, and interventions to  
16  
17  
18 364 increase the likelihood of sustainable success.[46] Additionally, Kamal *et al.* indicated that  
19  
20 365 PACs lead to more planned admissions to the ICU, HDU, and PACU, which is more  
21  
22  
23 366 predictable for patients, staff, and administration.[34]  
24  
25 367  
26  
27 368 Another finding of this review was a significant reduction in the length of hospital stay  
28  
29  
30 369 following patients' examination in a PAC; however, a small number of studies with low  
31  
32  
33 370 quality were considered. Nevertheless, similar results were found in another systematic  
34  
35 371 review claiming that perioperative systems support the hospitals by addressing the expected  
36  
37 372 growth in the number and complexity of surgical procedures.[16] When patients are  
38  
39  
40 373 examined in the PAC and well-prepared with information, consultations, and tests, they  
41  
42 374 need not be hospitalised until the day of surgery. A survey on operated patients showed that  
43  
44  
45 375 given a choice, 75% do not wish admission to the hospital until the day of operation; a major  
46  
47 376 reason being shorter hospital stay.[47] An updated systematic review on the effectiveness of  
48  
49  
50 377 nurse-led preoperative assessment services for elective surgery found that the included  
51  
52 378 articles demonstrated a reduced length of stay; these studies had low methodological  
53  
54  
55 379 quality, and therefore, the authors could not conclude that this service leads to reduced  
56  
57 380 length of hospital stay.[17]  
58  
59 381  
60

### 382 **Strengths and limitations of the study**

383 The review was performed in duplicate or independently by two researchers, and consensus  
384 was reached through discussion. However, grey literature, such as government and  
385 institutional documents, was excluded and might be a limitation of this study. Since  
386 organisation of healthcare systems varies among countries, the type of staff who performed  
387 the preoperative assessment was not considered as an inclusion criterion. The European  
388 Society of Anaesthesiology guidelines recommend that the anaesthesiologists must  
389 complete the preoperative assessment while trained nurses or anaesthesia trainees should  
390 perform the screening.[8] A preoperative evaluation performed by an internist was  
391 associated with increased length of stay and increased postoperative mortality.[48] The  
392 results of this systematic review may have been affected by the heterogeneity in the types  
393 of staff performing the preoperative assessment.

394  
395 We exclusively included studies with high internal validity. Therefore, several retrospective  
396 studies were excluded. Nonetheless, as the remaining studies' risk of bias was fairly high,  
397 and they were heterogeneous, a meta-analysis was not statistically appropriate.[26] The  
398 included studies' designs could not rule out selection bias and confounders; thus, the  
399 strength of the evidence should be assessed cautiously. Many studies did not adjust for  
400 several confounders, which could be responsible for the observed effects. Several studies  
401 lacked descriptions of the methods used and the patients included, lowering transparency.  
402 The results are relevant to health care services, focusing on the well-being and safety of the  
403 patients.

### 405 **Implications for future research and practice**

1  
2  
3 406 This systematic review identified the ambiguity in the PAC interventions offered to the  
4  
5 407 intervention group. In many studies, it was evident that the methods used lacked clarity, and  
6  
7 408 high-quality research is needed in this field. The included studies did not demonstrate earlier  
8  
9 409 surgical room entry time[49,50] or reduction in the number of preoperative tests for  
10  
11 410 patients attending the PAC, similar to the results of the retrospective studies.[27]  
12  
13 411 Other implications may include the organisation structure of different PACs and their  
14  
15 412 functioning. Additionally, the tests that should be part of the assessment at the PACs should  
16  
17 413 be investigated. The use of technology, such as streaming services, facilitates different  
18  
19 414 patient groups and might become crucial for reducing human contact and spread of  
20  
21 415 infection in context of coronavirus disease 2019.  
22  
23  
24  
25  
26  
27

## 28 416 **CONCLUSION**

29  
30 417 PAC use has reduced the length of stay and surgery cancellation rate at hospitals. However,  
31  
32 418 the effectiveness of PAC, the major review question, remains unclear, and requires further  
33  
34 419 research. There is a demand for high-quality studies capturing robust data describing the  
35  
36 420 quality of care and clinical outcomes for patients requiring anaesthesia. This requires  
37  
38 421 increased focus and funding for this specific area of health services research and could,  
39  
40 422 therefore, lead to implementation of PACs in health care services and improve patient safety  
41  
42 423 and perioperative care.  
43  
44  
45  
46

## 47 424 **Acknowledgement**

48  
49 425 We thank the librarian Ellen Sejerstedt, University of Agder, Kristiansand, for helping with  
50  
51 426 the search strategy and elimination of duplicate articles.  
52  
53

## 54 427 **Competing Interests**

55  
56 428 The authors declare that they have no conflict of interest.  
57  
58

## 59 429 **Data sharing statement**

1  
2  
3 430 All data relevant to the study are included within the article or have been uploaded within  
4  
5 431 supplemental files.

7  
8 432 **Funding**

9  
10 433 This research received no specific grant from any funding agency in the public, commercial  
11  
12 434 or not-for-profit sectors.

13  
14  
15 435 **Author contributions**

16  
17 436 EWK, MF, AO, and TOT: Study design

18  
19 437 EWK, MF, AO: Search and screening of the articles

20  
21 438 EWK: Data extraction

22  
23 439 MF, AO, RCB, and TOT: Control of data extraction

24  
25 440 EWK, MF, AO, and RCB: Quality assessment of the included articles

26  
27 441 EWK: Drafting of the manuscript

28  
29 442 MF, AO, RCB, and TOT: Contribution to and review of the final version of the manuscript

30  
31 443 MF, AO, RCB, and TOT: Supervised the study

32  
33 444 **References**

34  
35 445 1 Braz LG, Braz DG, Da Cruz DS, et al. Mortality in anesthesia: a systematic review.

36  
37 446 *Clinics (Sao Paulo)* 2009;64:999–1006. doi: [10.1590/S1807-59322009001000011](https://doi.org/10.1590/S1807-59322009001000011).

38  
39 447 2 Santos ML, Novaes CO, Iglesias AC. Epidemiological profile of patients seen in the

40  
41 448 pre-anesthetic assessment clinic of a university hospital. *Rev Bras Anesthesiol*

42  
43 449 2017;67:457–67. doi: [doi.org/10.1016/j.bjan.2016.06.002](https://doi.org/10.1016/j.bjan.2016.06.002).

44  
45 450 3 Amaya F, Shimamoto S, Matsuda M, et al. Preoperative anesthesia clinic in Japan: a

46  
47 451 nationwide survey of the current practice of preoperative anesthesia assessment. *J*

48  
49 452 *Anesth* 2015;29:175–9. doi: [10.1007/s00540-014-1918-3](https://doi.org/10.1007/s00540-014-1918-3) [Published online first:

50  
51 453 2014/09/30].

- 1  
2  
3 454 4 Whitaker DK, Brattebø G, Smith AF, et al. The Helsinki Declaration on Patient Safety  
4  
5 in anaesthesiology: putting words into practice. *Best Pract Res Clin Anaesthesiol*  
6 455  
7  
8 456 2011;25:277–90. doi: [10.1016/j.bpa.2011.02.001](https://doi.org/10.1016/j.bpa.2011.02.001).  
9
- 10 457 5 Bainbridge D, Martin J, Arango M, et al. Perioperative and anaesthetic-related  
11  
12 mortality in developed and developing countries: a systematic review and meta-  
13 458  
14 analysis. *Lancet* 2012;380:1075–81. doi: [10.1016/S0140-6736\(12\)60990-8](https://doi.org/10.1016/S0140-6736(12)60990-8).  
15 459  
16
- 17 460 6 Herman AD, Jaruzel CB, Lawton S, et al. Morbidity, mortality, and systems safety in  
18  
19 non-operating room anaesthesia: a narrative review. *Br J Anaesth* 2021;127:729–44.  
20 461  
21  
22 462 doi: [10.1016/j.bja.2021.07.007](https://doi.org/10.1016/j.bja.2021.07.007).  
23  
24
- 25 463 7 Whitlock EL, Feiner JR, Chen LL. Perioperative mortality, 2010 to 2014: a  
26  
27 retrospective cohort study using the National anesthesia clinical outcomes registry.  
28 464  
29  
30 465 *Anesthesiology* 2015;123:1312–21. doi: [10.1097/ALN.0000000000000882](https://doi.org/10.1097/ALN.0000000000000882).  
31  
32
- 33 466 8 De Hert S, Staender S, Fritsch G, et al. Pre-operative evaluation of adults undergoing  
34  
35 elective noncardiac surgery: updated guideline from the European Society of  
36  
37 468 *Anaesthesiology*. *Eur J Anaesthesiol* 2018;35:407–65. doi:  
38  
39  
40 469 [10.1097/EJA.0000000000000817](https://doi.org/10.1097/EJA.0000000000000817).  
41
- 42 470 9 Chan FW, Wong F, Cheung YS, et al. Utility of a preoperative assessment clinic in a  
43  
44 tertiary care hospital. *Hong Kong Med J* 2011;17:441–5 [Published online first:  
45 471  
46  
47 472 2011/12/08].  
48
- 49 473 10 Gupta A, Gupta N. Setting up and functioning of a preanaesthetic clinic. *Indian J*  
50  
51 474 *Anaesth* 2010;54:504–7. doi: [10.4103/0019-5049.72638](https://doi.org/10.4103/0019-5049.72638).  
52  
53
- 54 475 11 Hariharan S, Chen D, Merritt-Charles L. Evaluation of the utilization of the  
55  
56 preanaesthetic clinics in a university teaching hospital. *BMC Health Serv Res*  
57 476  
58  
59 477 2006;6:59. doi: [10.1186/1472-6963-6-59](https://doi.org/10.1186/1472-6963-6-59) [Published online first: 2006/05/25].  
60



- 1  
2  
3 478 12 Goldenberg E, Saffary R, Schmiesing C. New role for the anesthesia preoperative  
4  
5 479 clinic: helping to ensure that surgery is the right choice for patients with serious  
6  
7 480 illness. *Anesth Analg* 2019;129:311–15. doi: [10.1213/ANE.0000000000004178](https://doi.org/10.1213/ANE.0000000000004178).  
9
- 10 481 13 Emanuel A, Macpherseon R. The anaesthetic pre-admission clinic is effective in  
11  
12 482 minimising surgical cancellation rates. *Anaesth Intensive Care* 2013;41:90–4. doi:  
13  
14 483 [10.1177/0310057X1304100115](https://doi.org/10.1177/0310057X1304100115).  
16
- 17 484 14 Blitz JD, Kendale SM, Jain SK, et al. Preoperative evaluation clinic visit is associated  
18  
19 485 with decreased risk of in-hospital postoperative mortality. *Anesthesiology*  
20  
21 486 2016;125:280–94. doi: [10.1097/ALN.0000000000001193](https://doi.org/10.1097/ALN.0000000000001193) [Published online first:  
22  
23 487 2016/07/21].  
24  
25  
26  
27 488 15 Committee on Standards and Practice Parameters, Apfelbaum JL, Connis RT et al.  
28  
29 489 Practice advisory for preanesthesia evaluation: an updated report by the American  
30  
31 490 Society of Anesthesiologists Task Force on Preanesthesia Evaluation. *Anesthesiology*  
32  
33 491 2012;116:522–38. doi: [10.1097/ALN.0b013e31823c1067](https://doi.org/10.1097/ALN.0b013e31823c1067).  
34  
35  
36  
37 492 16 Lee A, Kerridge RK, Chui PT, et al. Perioperative Systems as a quality model of  
38  
39 493 perioperative medicine and surgical care. *Health Policy* 2011;102:214–22. doi:  
40  
41 494 [10.1016/j.healthpol.2011.05.009](https://doi.org/10.1016/j.healthpol.2011.05.009) [Published online first: 2011/06/18].  
42  
43  
44  
45 495 17 Hines S, Munday J, Kynoch K. Effectiveness of nurse-led preoperative assessment  
46  
47 496 services for elective surgery: a systematic review update. *JBI Database System Rev*  
48  
49 497 *Implement Rep* 2015;13:279–317. doi: [10.11124/jbisrir-2015-1996](https://doi.org/10.11124/jbisrir-2015-1996).  
50  
51
- 52 498 18 Delaney D, Bayley EW, Olszewsky P, et al. Parental satisfaction with pediatric  
53  
54 499 preoperative assessment and education in a presurgical Care Center. *J Perianesth*  
55  
56 500 *Nurs* 2015;30:290–300. doi: [10.1016/j.jopan.2014.04.004](https://doi.org/10.1016/j.jopan.2014.04.004).  
57  
58  
59  
60

- 1  
2  
3 501 19 Davidson S, McKendrick D, French T. Preassessment clinic interview and patient  
4  
5 502 anxiety. *Saudi J Anaesth* 2016;10:402–08. doi: [10.4103/1658-354X.177339](https://doi.org/10.4103/1658-354X.177339).  
6  
7  
8 503 20 Turunen E, Miettinen M, Setälä L, et al. The impact of a structured preoperative  
9  
10 504 protocol on day of surgery cancellations. *J Clin Nurs* 2018;27:288–305. doi:  
11  
12 [10.1111/jocn.13896](https://doi.org/10.1111/jocn.13896).  
13 505  
14  
15 506 21 Holt NF, Silverman DG, Prasad R, et al. Preanesthesia clinics, information  
16  
17 507 management, and operating room delays: results of a survey of practicing  
18  
19 508 anesthesiologists. *Anesth Analg* 2007;104:615–18. doi:  
20  
21 [10.1213/01.ane.0000255253.62668.3a](https://doi.org/10.1213/01.ane.0000255253.62668.3a).  
22 509  
23 510 22 <http://www.training.cochrane.org/handbook> (Accessed 08/12/2018), 2019 updated  
24  
25 511 July 2019.  
26  
27  
28 512 23 Moher D, Liberati A, Tetzlaff J, et al. Preferred Reporting Items for Systematic  
29  
30 513 Reviews and Meta-Analyses: the PRISMA statement. *BMJ* 2009;339:b2535. doi:  
31  
32 514 [10.1136/bmj.b2535](https://doi.org/10.1136/bmj.b2535).  
33  
34  
35 515 24 Kristoffersen EW, Opsal A, Tveit TO, et al. The effect of preanaesthetic assessment  
36  
37 516 clinic: a systematic review of randomised and non-randomised prospective  
38  
39 517 controlled studies. *Prospero* 2019;CRD42019137724.  
40  
41  
42 518 25 Booth A, Sutton A, Papaioannou D. Systematic approaches to a successful literature  
43  
44 519 review. *Los Angeles*. California: Sage 2016.  
45  
46  
47 520 26 Møller AM, Myles PS. What makes a good systematic review and meta-analysis? *Br J*  
48  
49 521 *Anaesth* 2016;117:428–30. doi: [10.1093/bja/aew264](https://doi.org/10.1093/bja/aew264).  
50  
51  
52 522 27 Fischer SP. Development and effectiveness of an anesthesia preoperative evaluation  
53  
54 523 clinic in a teaching hospital. *Anesthesiology* 1996;85:196–206. doi:  
55  
56 524 [10.1097/00000542-199607000-00025](https://doi.org/10.1097/00000542-199607000-00025) [Published online first: 1996/07/01].  
57  
58  
59  
60

- 1  
2  
3 525 28 <https://www.covidence.org/reviews/active> (Accessed 29/09/2018).  
4  
5  
6 526 29 Tufanaru C, Munn Z, Aromataris E, et al. Systematic review of effectiveness. JBI  
7  
8 527 Manual for evidence synthesis. In: Aromataris E, Munn Z, eds.: *JBI Manual for*  
9  
10 528 *evidence synthesis 2020*.  
11  
12  
13 529 30 Klopfenstein CE, Forster A, Van Gessel E. Anesthetic assessment in an outpatient  
14  
15 530 consultation clinic reduces preoperative anxiety. *Can J Anaesth* 2000;47:511–5. doi:  
16  
17 531 [10.1007/BF03018941](https://doi.org/10.1007/BF03018941) [Published online first: 2000/06/30].  
18  
19  
20 532 31 Kamau A, Mung'ayi V, Yonga G. The effect of a preanaesthesia clinic consultation on  
21  
22 533 adult patient anxiety at a tertiary hospital in Kenya: a cohort study. *Afr Health Sci*  
23  
24 534 2017;17:138–46. doi: [10.4314/ahs.v17i1.18](https://doi.org/10.4314/ahs.v17i1.18) [Published online first: 2017/10/14].  
25  
26  
27 535 32 van Klei WA, Moons KG, Rutten CL, et al. The effect of outpatient preoperative  
28  
29 536 evaluation of hospital inpatients on cancellation of surgery and length of hospital  
30  
31 537 stay. *Anesth Analg* 2002;94:644–9; table of contents. doi: [10.1097/00000539-](https://doi.org/10.1097/00000539-200203000-00030)  
32  
33 538 [200203000-00030](https://doi.org/10.1097/00000539-200203000-00030) [Published online first: 2002/02/28].  
34  
35  
36  
37 539 33 Farasatkish R, Aghdaii N, Azarfarin R, et al. Can preoperative anesthesia consultation  
38  
39 540 clinic help to reduce operating room cancellation rate on the day of surgery? *Rawal*  
40  
41 541 *Med J* 2009;34:26–8.  
42  
43  
44 542 34 Kamal T, Conway RM, Littlejohn I, et al. The role of a multidisciplinary pre-assessment  
45  
46 543 clinic in reducing mortality after complex orthopaedic surgery. *Ann R Coll Surg Engl*  
47  
48 544 2011;93:149–51. doi: [10.1308/003588411X561026](https://doi.org/10.1308/003588411X561026).  
49  
50  
51  
52 545 35 Lee A, Chui PT, Chiu CH, et al. The cost-effectiveness of an outpatient anesthesia  
53  
54 546 consultation clinic before surgery: a matched Hong Kong cohort study. *Perioper Med*  
55  
56 547 (*Lond*) 2012;1:3. doi: [10.1186/2047-0525-1-3](https://doi.org/10.1186/2047-0525-1-3) [Published online first: 2012/01/01].  
57  
58  
59  
60

- 1  
2  
3 548 36 Mendes FF, Mathias LA, Duval Neto GF, et al. Impact of preoperative outpatient  
4  
5 549 evaluation clinic on performance indicators. *Rev Bras anesthesiol* 2005;55:175–87. doi:  
6  
7 [10.1590/S0034-70942005000200004](https://doi.org/10.1590/S0034-70942005000200004).  
8 550  
9  
10 551 37 Myles PS, Hunt JO, Nightingale CE, et al. Development and psychometric testing of a  
11  
12 552 quality of recovery score after general anesthesia and surgery in adults. *Anesth Analg*  
13  
14 553 1999;88:83–90. doi: [10.1097/00000539-199901000-00016](https://doi.org/10.1097/00000539-199901000-00016) [Published online first:  
15  
16 554 1999/01/23].  
17  
18 555 38 Mitchell M. Anaesthesia type, gender and anxiety. *J Perioper Pract* 2013;23:41–7.  
19  
20 556 doi: [10.1177/175045891302300301](https://doi.org/10.1177/175045891302300301) [Published online first: 2013/04/17].  
21  
22 557 39 Karim HMR, Singha SK, Neema PK, et al. Information technology-based joint  
23  
24 558 preoperative assessment, risk stratification and its impact on patient management,  
25  
26 559 perioperative outcome, and cost 2021; 9:e130. doi: [10.15190/d.2020.9](https://doi.org/10.15190/d.2020.9).  
27  
28 560 40 *National guideline C. National Institute for Health and Care Excellence: clinical*  
29  
30 561 *guidelines. Preoperative tests (update): routine preoperative tests for elective*  
31  
32 562 *surgery*. London: National Institute for Health and Care Excellence, UK2016.  
33  
34 563 41 Reazaul Karim HM, Prakash A, Sahoo SK, et al. Abnormal routine pre-operative test  
35  
36 564 results and their impact on anaesthetic management: an observational study. *Indian*  
37  
38 565 *J Anaesth* 2018;62:23–8. doi: [10.4103/ija.IJA\\_223\\_17](https://doi.org/10.4103/ija.IJA_223_17).  
39  
40 566 42 Savoldelli GL. Perioperative care is a hazardous business: let's make it safer! *Trends*  
41  
42 567 *Anaesth Crit Care* 2016;7–8:3–4. doi: [10.1016/j.tacc.2016.05.003](https://doi.org/10.1016/j.tacc.2016.05.003).  
43  
44 568 43 Pearse RM, Moreno RP, Bauer P, et al. Mortality after surgery in Europe: a 7 day  
45  
46 569 cohort study. *Lancet* 2012;380:1059–65. doi: [10.1016/S0140-6736\(12\)61148-9](https://doi.org/10.1016/S0140-6736(12)61148-9).  
47  
48 570 44 Cantlay KL, Baker S, Parry A, et al. The impact of a consultant anaesthetist led pre-  
49  
50 571 operative assessment clinic on patients undergoing major vascular surgery.  
51  
52  
53  
54  
55  
56  
57  
58  
59  
60

- 1  
2  
3 572 *Anaesthesia* 2006;61:234–9. doi: [10.1111/j.1365-2044.2005.04514.x](https://doi.org/10.1111/j.1365-2044.2005.04514.x) [Published  
4  
5  
6 573 online first: 2006/02/17].  
7  
8 574 45 Hänninen-Khoda L, Koljonen V, Ylä-Kotola T. Patient-related reasons for late surgery  
9  
10 575 cancellations in a plastic and reconstructive surgery department. *JPRAS Open*  
11  
12 576 2018;18:38–48. doi: [10.1016/j.jpra.2018.08.002](https://doi.org/10.1016/j.jpra.2018.08.002).  
13  
14  
15 577 46 Geerligs L, Rankin NM, Shepherd HL, et al. Hospital-based interventions: a systematic  
16  
17 578 review of staff-reported barriers and facilitators to implementation processes.  
18  
19 579 *Implement Sci* 2018;13:36. doi: [10.1186/s13012-018-0726-9](https://doi.org/10.1186/s13012-018-0726-9).  
20  
21  
22 580 47 Harries RL, Bradshaw CA, Jones EA, et al. To admit or not to admit on the morning of  
23  
24 581 surgery patients' perspectives on day of surgery admission. *J Perioper Pract*  
25  
26 582 2013;23:56–8. doi: [10.1177/175045891302300304](https://doi.org/10.1177/175045891302300304).  
27  
28  
29 583 48 Wijeyesundera DN, Austin PC, Beattie WS, et al. Outcomes and processes of care  
30  
31 584 related to preoperative medical consultation. *Arch Intern Med* 2010;170:1365–74.  
32  
33 585 doi: [10.1001/archinternmed.2010.204](https://doi.org/10.1001/archinternmed.2010.204).  
34  
35  
36 586 49 Ferschl MB, Tung A, Sweitzer BB, et al. Preoperative clinic visits reduce operating  
37  
38 587 room cancellations and delays. *Anesthesiology* 2005;103:855–59. doi:  
39  
40 588 [10.1097/00000542-200510000-00025](https://doi.org/10.1097/00000542-200510000-00025).  
41  
42  
43 589 50 Correll DJ, Bader AM, Hull MW, et al. Value of preoperative clinic visits in identifying  
44  
45 590 issues with potential impact on operating room efficiency. *Anesthesiology*  
46  
47 591 2006;105:1254–9; discussion 6A. doi: [10.1097/00000542-200612000-00026](https://doi.org/10.1097/00000542-200612000-00026)  
48  
49 592 [Published online first: 2006/11/24].  
50  
51  
52 593  
53  
54 594  
55  
56 595  
57  
58  
59  
60

1  
2  
3  
4  
5  
6  
7  
8  
9  
10  
11  
12  
13  
14  
15  
16  
17  
18  
19  
20  
21  
22  
23  
24  
25  
26  
27  
28  
29  
30  
31  
32  
33  
34  
35  
36  
37  
38  
39  
40  
41  
42  
43  
44  
45  
46  
47  
48  
49  
50  
51  
52  
53  
54  
55  
56  
57  
58  
59  
60

596 **Figure legends**

597

598 Figure 1: Preferred Reporting Items for Systematic Reviews and Meta-Analysis (PRISMA).

599 [23]

600 Figure 2: The Joanna Briggs Institute Critical appraisal checklist for quasi-experimental

601 studies was used for the risk of bias assessment. [29]

For peer review only



1  
2  
3  
4  
5  
6  
7  
8  
9  
10  
11  
12  
13  
14  
15  
16  
17  
18  
19  
20  
21  
22  
23  
24  
25  
26  
27  
28  
29  
30  
31  
32  
33  
34  
35  
36  
37  
38  
39  
40  
41  
42  
43  
44  
45  
46  
47  
48  
49  
50  
51  
52  
53  
54  
55  
56  
57  
58  
59  
60

Identification

Records identified through  
database searching  
(n=2981)  
  
(Embase n=1572, Cinahl n=209,  
Medline n=1200)

Screening

Duplicates removed  
(n=923)

Title and abstract screened  
(n=2058)

Records excluded  
(n=1879)

Eligibility

Full-text articles assessed  
for eligibility  
(n=179)

Full-text articles excluded,  
with reasons  
(n=173)

- 82 wrong study design
- 27 not a preoperative anaesthesia clinic
- 23 not a research paper
- 18 abstract/conference/ editorial letter
- 15 wrong interventions/ setting
- 2 full text not available
- 4 duplicates
- 2 wrong languages

Studies included in  
systematic review  
(n=6)

Included

Additional searching in  
references (=1)

Studies included in  
systematic review  
(n=7)

Figure 1: Preferred Reporting Items for Systematic Reviews and Meta-Analysis (PRISMA). [24]

|                   | Are cause and effect clear? | Are comparison participants similar? | Did comparison participants have similar care? | Was there a control group? | Were there multiple pre post measurements? | Was follow-up complete? | Were outcomes measured the same way? | Were outcomes measured in reliable way? | Was appropriate stat analysis used? |
|-------------------|-----------------------------|--------------------------------------|------------------------------------------------|----------------------------|--------------------------------------------|-------------------------|--------------------------------------|-----------------------------------------|-------------------------------------|
| Farasatkish 2009  | +                           | +                                    | ?                                              | +                          | -                                          | ?                       | +                                    | +                                       | +                                   |
| Kamal 2011        | +                           | ?                                    | ?                                              | +                          | -                                          | ?                       | ?                                    | ?                                       | ?                                   |
| Kamau 2017        | +                           | +                                    | -                                              | +                          | -                                          | +                       | +                                    | +                                       | +                                   |
| Klopfenstein 2000 | +                           | -                                    | +                                              | +                          | -                                          | ?                       | +                                    | +                                       | +                                   |
| Lee 2012          | +                           | +                                    | -                                              | +                          | -                                          | ?                       | +                                    | +                                       | +                                   |
| Mendes 2005       | +                           | ?                                    | ?                                              | +                          | -                                          | ?                       | ?                                    | ?                                       | +                                   |
| van Klei 2002     | +                           | +                                    | -                                              | +                          | -                                          | ?                       | +                                    | +                                       | +                                   |

Figure 2: The Joanna Briggs Institute Critical appraisal checklist for quasi-experimental studies was used for the risk of bias assessment. [30]



# Appendix 1: Search strategies

## Table of Content

|                                                        |   |
|--------------------------------------------------------|---|
| <b>1. Database Search Strategies</b> .....             | 2 |
| <b>2. Initial searches, 11 September 2018</b> .....    | 2 |
| <b>2.1. Main Databases</b> .....                       | 2 |
| Database: Embase, (Ovid).....                          | 2 |
| Database: Medline (Ovid) .....                         | 2 |
| Database: Cinahl Plus with Full Text (EBSCOhost).....  | 3 |
| <b>3. Search update, 3 February 2020</b> .....         | 3 |
| <b>3.1. Main Databases</b> .....                       | 3 |
| Database: Embase (Ovid).....                           | 3 |
| Database: Medline (Ovid) .....                         | 4 |
| Database: Cinahl Plus with Full Text (EBSCO host)..... | 4 |
| <b>4. Search update, 4 February 2021</b> .....         | 5 |
| <b>4.1. Main Databases</b> .....                       | 5 |
| Database: Embase (Ovid).....                           | 5 |
| Database: Medline (Ovid) .....                         | 5 |
| Database: Cinahl Plus with Full Text (EBSCO host)..... | 6 |

## 1. Database Search Strategies

The search mode for CINAHL was Boolean/Phrase. For those searches that are done without search fields - it is automatically searched in the standard fields that CINAHL uses, including words from title, summary, and subject headings.

Search 1 and Search 2 are with words in the title (TI in front of the keywords), however this have not been done with the other searches.

Embase and Medline have the same search mode because we are searching for words from title, summary, and subject headings.

## 2. Initial searches, 11 September 2018

### 2.1. Main Databases

*Database: Embase, (Ovid)*

Results: n=1287

Search:

- 1 ((pre-operativ\* or preoperativ\* or pre operativ\*) and (assessment\* or measurement\* or evaluat\*)).ti.
- 2 (clinic\* or unit\* or nurs\* or outpatient\* or ward\* or center\* or centre\*).ti.
- 3 1 and 2
- 4 ((preanaesthe\* or pre-anaesthe\* or pre anaesthe\* or pre-anesthe\* or preanesthe\* or pre anesthe\*) adj4 (assessment\* or measurement\* or evaluat\* or clinic\* or nurs\* or unit\* or outpatient\* or ward\* or center\* or centre\*)).ti,ab. (689)
- 5 (((pre-admiss\* or preadmiss\*) adj4 (assessment\* or measurement\* or evaluat\* or clinic\* or unit\* or nurs\* or outpatient\* or ward\* or centre\* or center\*)) and (surg\* or anaesthe\* or anesthe\* or preoperativ\* or pre-operativ\* or preanaesthe\* or pre-anaesthe\* or pre anaesthe\* or pre-anesthe\* or preanesthe\* or pre anesthe\*)).ti,ab.
- 6 ((anaesthe\* or anasthe\* or anesthe\*) adj4 outpatient\* adj4 clinic\*).ti,ab.
- 7 ((pre-admiss\* or preadmiss\*) adj4 (center\* or centre\*) adj4 (evaluat\* or assessment\* or measurement\*)).ti,ab.
- 8 or/3-7
- 9 limit 8 to yr="1996 -Current"
- 10 limit 9 to (conference abstracts or embase)

*Database: Medline (Ovid)*

Results: n=997

Search:

- 1 ((pre-operativ\* or preoperativ\* or pre operativ\*) and (assessment\* or measurement\* or evaluat\*)).ti.
- 2 clinic\* or unit\* or nurs\* or outpatient\* or ward\* or center\* or centre\*).ti.
- 3 1 and 2

1  
2  
3 4 ((preanaesthe\* or pre-anaesthe\* or pre anaesthe\* or pre-anesthe\* or  
4 preanesthe\* or pre anesthe\*) adj4 (assessment\* or measurement\* or evaluat\* or  
5 clinic\* or nurs\* or unit\* or outpatient\* or ward\* or center\* or centre\*)).ti,ab.  
6 5 (((pre-admiss\* or preadmiss\*) adj4 (assessment\* or measurement\* or evaluat\*  
7 or clinic\* or unit\* or nurs\* or outpatient\* or ward\* or centre\* or center\*)) and (surg\*  
8 or anaesthe\* or anesthe\* or preoperativ\* or pre-operativ\* or preanaesthe\* or pre-  
9 anaesthe\* or pre anaesthe\* or pre-anesthe\* or preanesthe\* or pre  
10 anesthe\*)).ti,ab.  
11 6 ((anaesthe\* or anasthe\* or anesthe\*) adj4 outpatient\* adj4 clinic\*).ti,ab.  
12 7 ((pre-admiss\* or preadmiss\*) adj4 (center\* or centre\*) adj4 (evaluat\* or  
13 assessment\* or measurement\*)).ti,ab.  
14 8 or/3-7  
15 9 limit 8 to yr="1996 -Current"  
16 10 remove duplicates from 9

17  
18  
19  
20  
21 *Database: Cinahl Plus with Full Text (EBSCOhost)*

22  
23 Results: n=132

24 Search:

25 1 TI ((pre-operativ\* or preoperativ\* or "pre operativ\*") AND (assessment\* or  
26 measurement\* or evaluat\*))  
27 2 TI (clinic\* or unit\* or nurs\* or outpatient\* or ward\* or center\* or centre\*)  
28 3 S1 AND S2  
29 4 (preanaesthe\* or pre-anaesthe\* or "pre anaesthe\*" or pre-anesthe\* or  
30 preanesthe\* or "pre anesthe\*") N3 (assessment\* or measurement\* or evaluat\* or  
31 clinic\* or nurs\* or unit\* or outpatient\* or ward\* or centre\* or center\*)  
32 5 ((pre-admiss\* or preadmiss\*) N3 (assessment\* or measurement\* or evaluat\* or  
33 clinic\* or unit\* or nurs\* or outpatient\* or ward\* or centre\* or center\*)) AND (surg\*  
34 or anaesthe\* or anesthe\* or preoperativ\* or "pre operativ\*" pre-operativ\* or  
35 preanaesthe\* or pre-anaesthe\* or pre-anesthe\* or preanesthe\* or "pre anesthe\*")  
36 6 (anaesthe\* or anasthe\* or anesthe\*) N3 outpatient\* N3 clinic\*  
37 7 (pre-admiss\* or preadmiss\*) N3 (center\* or centre\*) N3 (evaluat\* or  
38 assessment\* or measurement\*)  
39 8 S3 OR S4 OR S5 OR S6 OR S7  
40 9 S3 OR S4 OR S5 OR S6 OR S7 Limiters - Published Date: 19960101-  
41 20181231; Exclude MEDLINE records  
42  
43  
44  
45

### 46 3. Search update, 3 February 2020

#### 47 3.1. Main Databases

48  
49  
50  
51 *Database: Embase (Ovid)*

52  
53 Results: n=1453

54 Search:

55 1 ((pre-operativ\* or preoperativ\* or pre operativ\*) and (assessment\* or  
56 measurement\* or evaluat\*)).ti.  
57 2 (clinic\* or unit\* or nurs\* or outpatient\* or ward\* or center\* or centre\*).ti.  
58 3 1 and 2  
59  
60

1  
2  
3 4 ((preanaesthe\* or pre-anaesthe\* or pre anaesthe\* or pre-anesthe\* or  
4 preanesthe\* or pre anesthe\*) adj4 (assessment\* or measurement\* or evaluat\* or  
5 clinic\* or nurs\* or unit\* or outpatient\* or ward\* or center\* or centre\*).ti,ab.  
6 5 (((pre-admiss\* or preadmiss\*) adj4 (assessment\* or measurement\* or evaluat\*  
7 or clinic\* or unit\* or nurs\* or outpatient\* or ward\* or centre\* or center\*)) and (surg\*  
8 or anaesthe\* or anesthe\* or preoperativ\* or pre-operativ\* or preanaesthe\* or pre-  
9 anaesthe\* or pre anaesthe\* or pre-anesthe\* or preanesthe\* or pre  
10 anesthe\*).ti,ab.  
11 6 ((anaesthe\* or anasthe\* or anesthe\*) adj4 outpatient\* adj4 clinic\*).ti,ab.  
12 7 ((pre-admiss\* or preadmiss\*) adj4 (center\* or centre\*) adj4 (evaluat\* or  
13 assessment\* or measurement\*).ti,ab.  
14 8 or/3-7  
15 9 limit 8 to yr="1996 -Current"  
16 10 limit 9 to (conference abstracts or embase)

17  
18  
19  
20  
21  
22 *Database: Medline (Ovid)*

23  
24 Results: n=1105

25 Search:

26 1 ((pre-operativ\* or preoperativ\* or pre operativ\*) and (assessment\* or  
27 measurement\* or evaluat\*).ti.  
28 2 (clinic\* or unit\* or nurs\* or outpatient\* or ward\* or center\* or centre\*).ti.  
29 3 1 and 2  
30 4 ((preanaesthe\* or pre-anaesthe\* or pre anaesthe\* or pre-anesthe\* or  
31 preanesthe\* or pre anesthe\*) adj4 (assessment\* or measurement\* or evaluat\* or  
32 clinic\* or nurs\* or unit\* or outpatient\* or ward\* or center\* or centre\*).ti,ab.  
33 5 (((pre-admiss\* or preadmiss\*) adj4 (assessment\* or measurement\* or evaluat\*  
34 or clinic\* or unit\* or nurs\* or outpatient\* or ward\* or centre\* or center\*)) and (surg\*  
35 or anaesthe\* or anesthe\* or preoperativ\* or pre-operativ\* or preanaesthe\* or pre-  
36 anaesthe\* or pre anaesthe\* or pre-anesthe\* or preanesthe\* or pre  
37 anesthe\*).ti,ab.  
38 6 ((anaesthe\* or anasthe\* or anesthe\*) adj4 outpatient\* adj4 clinic\*).ti,ab.  
39 7 ((pre-admiss\* or preadmiss\*) adj4 (center\* or centre\*) adj4 (evaluat\* or  
40 assessment\* or measurement\*).ti,ab.  
41 8 or/3-7  
42 9 limit 8 to yr="1996 -Current"

43  
44  
45  
46  
47 *Database: Cinahl Plus with Full Text (EBSCO host)*

48 Results: n=166

49 Search:

50 1TI ((pre-operativ\* or preoperativ\* or "pre operativ\*") AND (assessment\* or  
51 measurement\* or evaluat\*))  
52 2 TI (clinic\* or unit\* or nurs\* or outpatient\* or ward\* or center\* or centre\*)  
53 3 S1 AND S2  
54 4 (preanaesthe\* or pre-anaesthe\* or "pre anaesthe\*" or pre-anesthe\* or  
55 preanesthe\* or "pre anesthe\*") N3 (assessment\* or measurement\* or evaluat\* or  
56 clinic\* or nurs\* or unit\* or outpatient\* or ward\* or centre\* or center\*)  
57  
58  
59  
60

5 ((pre-admiss\* or preadmiss\*) N3 (assessment\* or measurement\* or evaluat\* or  
 6 clinic\* or unit\* or nurs\* or outpatient\* or ward\* or centre\* or center\*)) AND (surg\*  
 7 or anaesthe\* or aneste\* or preoperativ\* or "pre operativ\*" pre-operativ\* or  
 8 preanaesthe\* or pre-anaesthe\* or pre-anesthe\* or preanesthe\* or "pre anesthe\*")  
 9 6 (anaesthe\* or anasthe\* or anesthe\*) N3 outpatient\* N3 clinic\* 23  
 10 (pre-admiss\* or preadmiss\*) N3 (center\* or centre\*) N3 (evalu\* or assessment\*  
 11 or measurement\*)  
 12 7 S3 OR S4 OR S5 OR S6 OR S7 487  
 13 8 S3 OR S4 OR S5 OR S6 OR S7 Limiters - Published Date: 19960101-;  
 14 Exclude MEDLINE records

#### 4. Search update, 4 February 2021

##### 4.1. Main Databases

*Database: Embase (Ovid)*

Results: n=1572

Search:

- 1 ((pre-operativ\* or preoperativ\* or pre operativ\*) and (assessment\* or measurement\* or evaluat\*)).ti.
- 2 (clinic\* or unit\* or nurs\* or outpatient\* or ward\* or center\* or centre\*).ti.
- 3 1 and 2
- 4 ((preanaesthe\* or pre-anaesthe\* or pre anaesthe\* or pre-anesthe\* or preanesthe\* or pre anesthe\*) adj4 (assessment\* or measurement\* or evaluat\* or clinic\* or nurs\* or unit\* or outpatient\* or ward\* or center\* or centre\*).ti,ab.
- 5 (((pre-admiss\* or preadmiss\*) adj4 (assessment\* or measurement\* or evaluat\* or clinic\* or unit\* or nurs\* or outpatient\* or ward\* or centre\* or center\*)) and (surg\* or anaesthe\* or aneste\* or preoperativ\* or pre-operativ\* or preanaesthe\* or pre-anaesthe\* or pre anaesthe\* or pre-anesthe\* or preanesthe\* or pre anesthe\*).ti,ab.
- 6 ((anaesthe\* or anasthe\* or anesthe\*) adj4 outpatient\* adj4 clinic\*).ti,ab.
- 7 ((pre-admiss\* or preadmiss\*) adj4 (center\* or centre\*) adj4 (evalu\* or assessment\* or measurement\*)).ti,ab.
- 8 or/3-7
- 9 limit 8 to yr="1996 -Current"
- 10 limit 9 to (conference abstracts or embase)

*Database: Medline (Ovid)*

Results: n=1200

Search:

- 1 ((pre-operativ\* or preoperativ\* or pre operativ\*) and (assessment\* or measurement\* or evaluat\*)).ti.
- 2 (clinic\* or unit\* or nurs\* or outpatient\* or ward\* or center\* or centre\*).ti.
- 3 1 and 2
- 4 ((preanaesthe\* or pre-anaesthe\* or pre anaesthe\* or pre-anesthe\* or preanesthe\* or pre anesthe\*) adj4 (assessment\* or measurement\* or evaluat\* or clinic\* or nurs\* or unit\* or outpatient\* or ward\* or center\* or centre\*).ti,ab.

5 (((pre-admiss\* or preadmiss\*) adj4 (assessment\* or measurement\* or evaluat\*  
 6 or clinic\* or unit\* or nurs\* or outpatient\* or ward\* or centre\* or center\*)) and (surg\*  
 7 or anaesthe\* or anesthe\* or preoperativ\* or pre-operativ\* or preanaesthe\* or pre-  
 8 anaesthe\* or pre anaesthe\* or pre-anesthe\* or preanesthe\* or pre  
 9 anesthe\*).ti,ab.

6 ((anaesthe\* or anasthe\* or anesthe\*) adj4 outpatient\* adj4 clinic\*).ti,ab.

7 ((pre-admiss\* or preadmiss\*) adj4 (center\* or centre\*) adj4 (evaluat\* or  
 8 assessment\* or measurement\*).ti,ab. (4)

8 or/3-7

9 limit 8 to yr="1996 -Current"

16 *Database: Cinahl Plus with Full Text (EBSCO host)*

18 Results: n=209

19 Search:

20 1 TI ((pre-operativ\* or preoperativ\* or "pre operativ\*") AND (assessment\* or  
 21 measurement\* or evaluat\*))

22 2 TI (clinic\* or unit\* or nurs\* or outpatient\* or ward\* or center\* or centre\*)

23 3 S1 AND S2

24 4 (preanaesthe\* or pre-anaesthe\* or "pre anaesthe\*" or pre-anesthe\* or  
 25 preanesthe\* or "pre anesthe\*") N3 (assessment\* or measurement\* or evaluat\* or  
 26 clinic\* or nurs\* or unit\* or outpatient\* or ward\* or centre\* or center\*)

27 5 ((pre-admiss\* or preadmiss\*) N3 (assessment\* or measurement\* or evaluat\*  
 28 or clinic\* or unit\* or nurs\* or outpatient\* or ward\* or centre\* or center\*)) AND  
 29 (surg\* or anaesthe\* or anesthe\* or preoperativ\* or "pre operativ\*" pre-operativ\* or  
 30 preanaesthe\* or pre-anaesthe\* or pre-anesthe\* or preanesthe\* or "pre anesthe\*")

31 6 (anaesthe\* or anasthe\* or anesthe\*) N3 outpatient\* N3 clinic\* 30

32 7 (pre-admiss\* or preadmiss\*) N3 (center\* or centre\*) N3 (evaluat\* or  
 33 assessment\* or measurement\*)

34 8 S3 OR S4 OR S5 OR S6 OR S7

35 9 S3 OR S4 OR S5 OR S6 OR S7 Limiters - Published Date: 19960101-;

36 Exclude MEDLINE records

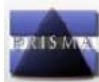

# PRISMA 2020 Checklist

| Section and Topic             | Item # | Checklist item                                                                                                                                                                                                                                                                                       | Location where item is reported |
|-------------------------------|--------|------------------------------------------------------------------------------------------------------------------------------------------------------------------------------------------------------------------------------------------------------------------------------------------------------|---------------------------------|
| <b>TITLE</b>                  |        |                                                                                                                                                                                                                                                                                                      |                                 |
| Title                         | 1      | Identify the report as a systematic review.                                                                                                                                                                                                                                                          | 1                               |
| <b>ABSTRACT</b>               |        |                                                                                                                                                                                                                                                                                                      |                                 |
| Abstract                      | 2      | See the PRISMA 2020 for Abstracts checklist.                                                                                                                                                                                                                                                         | 2                               |
| <b>INTRODUCTION</b>           |        |                                                                                                                                                                                                                                                                                                      |                                 |
| Rationale                     | 3      | Describe the rationale for the review in the context of existing knowledge.                                                                                                                                                                                                                          | 3-5                             |
| Objectives                    | 4      | Provide an explicit statement of the objective(s) or question(s) the review addresses.                                                                                                                                                                                                               | 5                               |
| <b>METHODS</b>                |        |                                                                                                                                                                                                                                                                                                      |                                 |
| Eligibility criteria          | 5      | Specify the inclusion and exclusion criteria for the review and how studies were grouped for the syntheses.                                                                                                                                                                                          | 6                               |
| Information sources           | 6      | Specify all databases, registers, websites, organisations, reference lists and other sources searched or consulted to identify studies. Specify the date when each source was last searched or consulted.                                                                                            | 5-6                             |
| Search strategy               | 7      | Present the full search strategies for all databases, registers and websites, including any filters and limits used.                                                                                                                                                                                 | 5-6+App. 1                      |
| Selection process             | 8      | Specify the methods used to decide whether a study met the inclusion criteria of the review, including how many reviewers screened each record and each report retrieved, whether they worked independently, and if applicable, details of automation tools used in the process.                     | 6                               |
| Data collection process       | 9      | Specify the methods used to collect data from reports, including how many reviewers collected data from each report, whether they worked independently, any processes for obtaining or confirming data from study investigators, and if applicable, details of automation tools used in the process. | 6-7                             |
| Data items                    | 10a    | List and define all outcomes for which data were sought. Specify whether all results that were compatible with each outcome domain in each study were sought (e.g. for all measures, time points, analyses), and if not, the methods used to decide which results to collect.                        | 7                               |
|                               | 10b    | List and define all other variables for which data were sought (e.g. participant and intervention characteristics, funding sources). Describe any assumptions made about any missing or unclear information.                                                                                         | 7                               |
| Study risk of bias assessment | 11     | Specify the methods used to assess risk of bias in the included studies, including details of the tool(s) used, how many reviewers assessed each study and whether they worked independently, and if applicable, details of automation tools used in the process.                                    | 6-7                             |
| Effect measures               | 12     | Specify for each outcome the effect measure(s) (e.g. risk ratio, mean difference) used in the synthesis or presentation of results.                                                                                                                                                                  | 7, 12                           |
| Synthesis methods             | 13a    | Describe the processes used to decide which studies were eligible for each synthesis (e.g. tabulating the study intervention characteristics and comparing against the planned groups for each synthesis (item #5)).                                                                                 | 7                               |
|                               | 13b    | Describe any methods required to prepare the data for presentation or synthesis, such as handling of missing summary statistics, or data conversions.                                                                                                                                                | 7                               |
|                               | 13c    | Describe any methods used to tabulate or visually display results of individual studies and syntheses.                                                                                                                                                                                               | 7                               |
|                               | 13d    | Describe any methods used to synthesize results and provide a rationale for the choice(s). If meta-analysis was performed, describe the model(s), method(s) to identify the presence and extent of statistical heterogeneity, and software package(s) used.                                          | 7                               |
|                               | 13e    | Describe any methods used to explore possible causes of heterogeneity among study results (e.g. subgroup analysis, meta-regression).                                                                                                                                                                 | 7                               |
|                               | 13f    | Describe any sensitivity analyses conducted to assess robustness of the synthesized results.                                                                                                                                                                                                         | 7                               |
| Reporting bias assessment     | 14     | Describe any methods used to assess risk of bias due to missing results in a synthesis (arising from reporting biases).                                                                                                                                                                              | 6-7                             |
| Certainty                     | 15     | Describe any methods used to assess certainty (or confidence) in the body of evidence for an outcome.                                                                                                                                                                                                | 6-7                             |

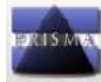

## PRISMA 2020 Checklist

| Section and Topic                              | Item # | Checklist item                                                                                                                                                                                                                                                                       | Location where item is reported |
|------------------------------------------------|--------|--------------------------------------------------------------------------------------------------------------------------------------------------------------------------------------------------------------------------------------------------------------------------------------|---------------------------------|
| assessment                                     |        |                                                                                                                                                                                                                                                                                      |                                 |
| <b>RESULTS</b>                                 |        |                                                                                                                                                                                                                                                                                      |                                 |
| Study selection                                | 16a    | Describe the results of the search and selection process, from the number of records identified in the search to the number of studies included in the review, ideally using a flow diagram.                                                                                         | 7                               |
|                                                | 16b    | Cite studies that might appear to meet the inclusion criteria, but which were excluded, and explain why they were excluded.                                                                                                                                                          | 7                               |
| Study characteristics                          | 17     | Cite each included study and present its characteristics.                                                                                                                                                                                                                            | 9-10                            |
| Risk of bias in studies                        | 18     | Present assessments of risk of bias for each included study.                                                                                                                                                                                                                         | 12                              |
| Results of individual studies                  | 19     | For all outcomes, present, for each study: (a) summary statistics for each group (where appropriate) and (b) an effect estimate and its precision (e.g. confidence/credible interval), ideally using structured tables or plots.                                                     | 8-16                            |
| Results of syntheses                           | 20a    | For each synthesis, briefly summarise the characteristics and risk of bias among contributing studies.                                                                                                                                                                               | 8-16                            |
|                                                | 20b    | Present results of all statistical syntheses conducted. If meta-analysis was done, present for each the summary estimate and its precision (e.g. confidence/credible interval) and measures of statistical heterogeneity. If comparing groups, describe the direction of the effect. | 12                              |
|                                                | 20c    | Present results of all investigations of possible causes of heterogeneity among study results.                                                                                                                                                                                       | 12                              |
|                                                | 20d    | Present results of all sensitivity analyses conducted to assess the robustness of the synthesized results.                                                                                                                                                                           | 12                              |
| Reporting biases                               | 21     | Present assessments of risk of bias due to missing results (arising from reporting biases) for each synthesis assessed.                                                                                                                                                              | 12                              |
| Certainty of evidence                          | 22     | Present assessments of certainty (or confidence) in the body of evidence for each outcome assessed.                                                                                                                                                                                  | 12                              |
| <b>DISCUSSION</b>                              |        |                                                                                                                                                                                                                                                                                      |                                 |
| Discussion                                     | 23a    | Provide a general interpretation of the results in the context of other evidence.                                                                                                                                                                                                    | 16                              |
|                                                | 23b    | Discuss any limitations of the evidence included in the review.                                                                                                                                                                                                                      | 19                              |
|                                                | 23c    | Discuss any limitations of the review processes used.                                                                                                                                                                                                                                | 19                              |
|                                                | 23d    | Discuss implications of the results for practice, policy, and future research.                                                                                                                                                                                                       | 19-20                           |
| <b>OTHER INFORMATION</b>                       |        |                                                                                                                                                                                                                                                                                      |                                 |
| Registration and protocol                      | 24a    | Provide registration information for the review, including register name and registration number, or state that the review was not registered.                                                                                                                                       | 2-5                             |
|                                                | 24b    | Indicate where the review protocol can be accessed, or state that a protocol was not prepared.                                                                                                                                                                                       | 2-5                             |
|                                                | 24c    | Describe and explain any amendments to information provided at registration or in the protocol.                                                                                                                                                                                      | 2-5                             |
| Support                                        | 25     | Describe sources of financial or non-financial support for the review, and the role of the funders or sponsors in the review.                                                                                                                                                        | 21                              |
| Competing interests                            | 26     | Declare any competing interests of review authors.                                                                                                                                                                                                                                   | 20                              |
| Availability of data, code and other materials | 27     | Report which of the following are publicly available and where they can be found: template data collection forms; data extracted from included studies; data used for all analyses; analytic code; any other materials used in the review.                                           | 20-21                           |



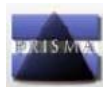

## PRISMA 2020 Checklist

For more information, visit: <http://www.prisma-statement.org/>

For peer review only

1  
2  
3  
4  
5  
6  
7  
8  
9  
10  
11  
12  
13  
14  
15  
16  
17  
18  
19  
20  
21  
22  
23  
24  
25  
26  
27  
28  
29  
30  
31  
32  
33  
34  
35  
36  
37  
38  
39  
40  
41  
42  
43  
44  
45  
46  
47
