# Supplementary material for: Effectiveness of pre-anaesthetic assessment clinic: a systematic review of randomised and non-randomised prospective controlled studies
Source: PubMed Central journal article supplement — BMJ Open. 2022 May 11;12(5):e054206. doi: 10.1136/bmjopen-2021-054206 (PMC9096538; doi:10.1136/bmjopen-2021-054206), 2022-05-11
Supplement: bmjopen-2021-054206supp001.pdf [file bmjopen-2021-054206supp001.pdf]

## Appendix 1: Search strategies

### Table of Content

|                                                         |   |
|---------------------------------------------------------|---|
| <b>1. Database Search Strategies</b> .....              | 2 |
| <b>2. Initial searches, 11 September 2018</b> .....     | 2 |
| <b>2.1. Main Databases</b> .....                        | 2 |
| Database: Embase, (Ovid).....                           | 2 |
| Database: Medline (Ovid) .....                          | 2 |
| Database: Cinahl Plus with Full Text (EBSCOhost) .....  | 3 |
| <b>3. Search update, 3 February 2020</b> .....          | 3 |
| <b>3.1. Main Databases</b> .....                        | 3 |
| Database: Embase (Ovid).....                            | 3 |
| Database: Medline (Ovid) .....                          | 4 |
| Database: Cinahl Plus with Full Text (EBSCO host) ..... | 4 |
| <b>4. Search update, 4 February 2021</b> .....          | 5 |
| <b>4.1. Main Databases</b> .....                        | 5 |
| Database: Embase (Ovid).....                            | 5 |
| Database: Medline (Ovid) .....                          | 5 |
| Database: Cinahl Plus with Full Text (EBSCO host) ..... | 6 |

## 1. Database Search Strategies

The search mode for CINAHL was Boolean/Phrase. For those searches that are done without search fields - it is automatically searched in the standard fields that CINAHL uses, including words from title, summary, and subject headings. Search 1 and Search 2 are with words in the title (TI in front of the keywords), however this have not been done with the other searches.

Embase and Medline have the same search mode because we are searching for words from title, summary, and subject headings.

## 2. Initial searches, 11 September 2018

### 2.1. Main Databases

*Database: Embase, (Ovid)*

Results: n=1287

Search:

- 1 ((pre-operativ\* or preoperativ\* or pre operativ\*) and (assessment\* or measurement\* or evaluat\*)).ti.
- 2 (clinic\* or unit\* or nurs\* or outpatient\* or ward\* or center\* or centre\*).ti.
- 3 1 and 2
- 4 ((preanaesthe\* or pre-anaesthe\* or pre anaesthe\* or pre-anesthe\* or preanesthe\* or pre anesthe\*) adj4 (assessment\* or measurement\* or evaluat\* or clinic\* or nurs\* or unit\* or outpatient\* or ward\* or center\* or centre\*)).ti,ab. (689)
- 5 (((pre-admiss\* or preadmiss\*) adj4 (assessment\* or measurement\* or evaluat\* or clinic\* or unit\* or nurs\* or outpatient\* or ward\* or centre\* or center\*)) and (surg\* or anaesthe\* or anesthe\* or preoperativ\* or pre-operativ\* or preanaesthe\* or pre-anaesthe\* or pre anaesthe\* or pre-anesthe\* or preanesthe\* or pre anesthe\*)).ti,ab.
- 6 ((anaesthe\* or anasthe\* or anesthe\*) adj4 outpatient\* adj4 clinic\*).ti,ab.
- 7 ((pre-admiss\* or preadmiss\*) adj4 (center\* or centre\*) adj4 (evaluat\* or assessment\* or measurement\*)).ti,ab.
- 8 or/3-7
- 9 limit 8 to yr="1996 -Current"
- 10 limit 9 to (conference abstracts or embase)

*Database: Medline (Ovid)*

Results: n=997

Search:

- 1 ((pre-operativ\* or preoperativ\* or pre operativ\*) and (assessment\* or measurement\* or evaluat\*)).ti.
- 2 clinic\* or unit\* or nurs\* or outpatient\* or ward\* or center\* or centre\*).ti.
- 3 1 and 2

4 ((preanaesthe\* or pre-anaesthe\* or pre anaesthe\* or pre-anesthe\* or preanesthe\* or pre anesthe\*) adj4 (assessment\* or measurement\* or evaluat\* or clinic\* or nurs\* or unit\* or outpatient\* or ward\* or center\* or centre\*)).ti,ab.  
 5 (((pre-admiss\* or preadmiss\*) adj4 (assessment\* or measurement\* or evaluat\* or clinic\* or unit\* or nurs\* or outpatient\* or ward\* or centre\* or center\*)) and (surg\* or anaesthe\* or anesthe\* or preoperativ\* or pre-operativ\* or preanaesthe\* or pre-anaesthe\* or pre anaesthe\* or pre-anesthe\* or preanesthe\* or pre anesthe\*)).ti,ab.  
 6 ((anaesthe\* or anasthe\* or anesthe\*) adj4 outpatient\* adj4 clinic\*).ti,ab.  
 7 ((pre-admiss\* or preadmiss\*) adj4 (center\* or centre\*) adj4 (evaluat\* or assessment\* or measurement\*)).ti,ab.  
 8 or/3-7  
 9 limit 8 to yr="1996 -Current"  
 10 remove duplicates from 9

*Database: Cinahl Plus with Full Text (EBSCOhost)*

Results: n=132

Search:

1 TI ((pre-operativ\* or preoperativ\* or "pre operativ\*") AND (assessment\* or measurement\* or evaluat\*))  
 2 TI (clinic\* or unit\* or nurs\* or outpatient\* or ward\* or center\* or centre\*)  
 3 S1 AND S2  
 4 (preanaesthe\* or pre-anaesthe\* or "pre anaesthe\*" or pre-anesthe\* or preanesthe\* or "pre anesthe\*") N3 (assessment\* or measurement\* or evaluat\* or clinic\* or nurs\* or unit\* or outpatient\* or ward\* or centre\* or center\*)  
 5 ((pre-admiss\* or preadmiss\*) N3 (assessment\* or measurement\* or evaluat\* or clinic\* or unit\* or nurs\* or outpatient\* or ward\* or centre\* or center\*)) AND (surg\* or anaesthe\* or anesthe\* or preoperativ\* or "pre operativ\*" pre-operativ\* or preanaesthe\* or pre-anaesthe\* or pre-anesthe\* or preanesthe\* or "pre anesthe\*")  
 6 (anaesthe\* or anasthe\* or anesthe\*) N3 outpatient\* N3 clinic\*  
 7 (pre-admiss\* or preadmiss\*) N3 (center\* or centre\*) N3 (evaluat\* or assessment\* or measurement\*)  
 8 S3 OR S4 OR S5 OR S6 OR S7  
 9 S3 OR S4 OR S5 OR S6 OR S7 Limiters - Published Date: 19960101-20181231; Exclude MEDLINE records

### 3. Search update, 3 February 2020

#### 3.1. Main Databases

*Database: Embase (Ovid)*

Results: n=1453

Search:

1 ((pre-operativ\* or preoperativ\* or pre operativ\*) and (assessment\* or measurement\* or evaluat\*)).ti.  
 2 (clinic\* or unit\* or nurs\* or outpatient\* or ward\* or center\* or centre\*).ti.  
 3 1 and 2

4 ((preanaesthe\* or pre-anaesthe\* or pre anaesthe\* or pre-anesthe\* or preanesthe\* or pre anesthe\*) adj4 (assessment\* or measurement\* or evaluat\* or clinic\* or nurs\* or unit\* or outpatient\* or ward\* or center\* or centre\*)).ti,ab.  
 5 (((pre-admiss\* or preadmiss\*) adj4 (assessment\* or measurement\* or evaluat\* or clinic\* or unit\* or nurs\* or outpatient\* or ward\* or centre\* or center\*)) and (surg\* or anaesthe\* or anesthe\* or preoperativ\* or pre-operativ\* or preanaesthe\* or pre-anaesthe\* or pre anaesthe\* or pre-anesthe\* or preanesthe\* or pre anesthe\*)).ti,ab.  
 6 ((anaesthe\* or anasthe\* or anesthe\*) adj4 outpatient\* adj4 clinic\*).ti,ab.  
 7 ((pre-admiss\* or preadmiss\*) adj4 (center\* or centre\*) adj4 (evaluat\* or assessment\* or measurement\*)).ti,ab.  
 8 or/3-7  
 9 limit 8 to yr="1996 -Current"  
 10 limit 9 to (conference abstracts or embase)

*Database: Medline (Ovid)*

Results: n=1105

Search:

1 ((pre-operativ\* or preoperativ\* or pre operativ\*) and (assessment\* or measurement\* or evaluat\*)).ti.  
 2 (clinic\* or unit\* or nurs\* or outpatient\* or ward\* or center\* or centre\*).ti.  
 3 1 and 2  
 4 ((preanaesthe\* or pre-anaesthe\* or pre anaesthe\* or pre-anesthe\* or preanesthe\* or pre anesthe\*) adj4 (assessment\* or measurement\* or evaluat\* or clinic\* or nurs\* or unit\* or outpatient\* or ward\* or center\* or centre\*)).ti,ab.  
 5 (((pre-admiss\* or preadmiss\*) adj4 (assessment\* or measurement\* or evaluat\* or clinic\* or unit\* or nurs\* or outpatient\* or ward\* or centre\* or center\*)) and (surg\* or anaesthe\* or anesthe\* or preoperativ\* or pre-operativ\* or preanaesthe\* or pre-anaesthe\* or pre anaesthe\* or pre-anesthe\* or preanesthe\* or pre anesthe\*)).ti,ab.  
 6 ((anaesthe\* or anasthe\* or anesthe\*) adj4 outpatient\* adj4 clinic\*).ti,ab.  
 7 ((pre-admiss\* or preadmiss\*) adj4 (center\* or centre\*) adj4 (evaluat\* or assessment\* or measurement\*)).ti,ab.  
 8 or/3-7  
 9 limit 8 to yr="1996 -Current"

*Database: Cinahl Plus with Full Text (EBSCO host)*

Results: n=166

Search:

1 TI ((pre-operativ\* or preoperativ\* or "pre operativ\*") AND (assessment\* or measurement\* or evaluat\*))  
 2 TI (clinic\* or unit\* or nurs\* or outpatient\* or ward\* or center\* or centre\*)  
 3 S1 AND S2  
 4 (preanaesthe\* or pre-anaesthe\* or "pre anaesthe\*" or pre-anesthe\* or preanesthe\* or "pre anesthe\*") N3 (assessment\* or measurement\* or evaluat\* or clinic\* or nurs\* or unit\* or outpatient\* or ward\* or centre\* or center\*)

5 ((pre-admiss\* or preadmiss\*) N3 (assessment\* or measurement\* or evaluat\* or clinic\* or unit\* or nurs\* or outpatient\* or ward\* or centre\* or center\*)) AND (surg\* or anaesthe\* or anesthe\* or preoperativ\* or "pre operativ\*" pre-operativ\* or preanaesthe\* or pre-anaesthe\* or pre-anesthe\* or preanesthe\* or "pre anesthe\*")  
 6 (anaesthe\* or anasthe\* or anesthe\*) N3 outpatient\* N3 clinic\* 23  
 (pre-admiss\* or preadmiss\*) N3 (center\* or centre\*) N3 (evaluat\* or assessment\* or measurement\*)  
 7 S3 OR S4 OR S5 OR S6 OR S7 487  
 8 S3 OR S4 OR S5 OR S6 OR S7 Limiters - Published Date: 19960101-;  
 Exclude MEDLINE records

#### 4. Search update, 4 February 2021

##### 4.1. Main Databases

*Database: Embase (Ovid)*

Results: n=1572

Search:

- 1 ((pre-operativ\* or preoperativ\* or pre operativ\*) and (assessment\* or measurement\* or evaluat\*)) .ti.
- 2 (clinic\* or unit\* or nurs\* or outpatient\* or ward\* or center\* or centre\*) .ti.
- 3 1 and 2
- 4 ((preanaesthe\* or pre-anaesthe\* or pre anaesthe\* or pre-anesthe\* or preanesthe\* or pre anesthe\*) adj4 (assessment\* or measurement\* or evaluat\* or clinic\* or nurs\* or unit\* or outpatient\* or ward\* or center\* or centre\*)) .ti,ab.
- 5 (((pre-admiss\* or preadmiss\*) adj4 (assessment\* or measurement\* or evaluat\* or clinic\* or unit\* or nurs\* or outpatient\* or ward\* or centre\* or center\*)) and (surg\* or anaesthe\* or anesthe\* or preoperativ\* or pre-operativ\* or preanaesthe\* or pre-anaesthe\* or pre anaesthe\* or pre-anesthe\* or preanesthe\* or pre anesthe\*)) .ti,ab.
- 6 ((anaesthe\* or anasthe\* or anesthe\*) adj4 outpatient\* adj4 clinic\*) .ti,ab.
- 7 ((pre-admiss\* or preadmiss\*) adj4 (center\* or centre\*) adj4 (evaluat\* or assessment\* or measurement\*)) .ti,ab.
- 8 or/3-7
- 9 limit 8 to yr="1996 -Current"
- 10 limit 9 to (conference abstracts or embase)

*Database: Medline (Ovid)*

Results: n=1200

Search:

- 1 ((pre-operativ\* or preoperativ\* or pre operativ\*) and (assessment\* or measurement\* or evaluat\*)) .ti.
- 2 (clinic\* or unit\* or nurs\* or outpatient\* or ward\* or center\* or centre\*) .ti.
- 3 1 and 2
- 4 ((preanaesthe\* or pre-anaesthe\* or pre anaesthe\* or pre-anesthe\* or preanesthe\* or pre anesthe\*) adj4 (assessment\* or measurement\* or evaluat\* or clinic\* or nurs\* or unit\* or outpatient\* or ward\* or center\* or centre\*)) .ti,ab.

5 (((pre-admiss\* or preadmiss\*) adj4 (assessment\* or measurement\* or evaluat\* or clinic\* or unit\* or nurs\* or outpatient\* or ward\* or centre\* or center\*)) and (surg\* or anaesthe\* or anesthe\* or preoperativ\* or pre-operativ\* or preanaesthe\* or pre-anaesthe\* or pre anaesthe\* or pre-anesthe\* or preanesthe\* or pre anesthe\*)).ti,ab.

6 ((anaesthe\* or anasthe\* or anesthe\*) adj4 outpatient\* adj4 clinic\*).ti,ab.

7 ((pre-admiss\* or preadmiss\*) adj4 (center\* or centre\*) adj4 (evaluat\* or assessment\* or measurement\*)).ti,ab. (4)

8 or/3-7

9 limit 8 to yr="1996 -Current"

*Database: Cinahl Plus with Full Text (EBSCO host)*

Results: n=209

Search:

1 T1 ((pre-operativ\* or preoperativ\* or "pre operativ\*") AND (assessment\* or measurement\* or evaluat\*))

2 T1 (clinic\* or unit\* or nurs\* or outpatient\* or ward\* or center\* or centre\*)

3 S1 AND S2

4 (preanaesthe\* or pre-anaesthe\* or "pre anaesthe\*" or pre-anesthe\* or preanesthe\* or "pre anesthe\*") N3 (assessment\* or measurement\* or evaluat\* or clinic\* or nurs\* or unit\* or outpatient\* or ward\* or centre\* or center\*)

5 ((pre-admiss\* or preadmiss\*) N3 (assessment\* or measurement\* or evaluat\* or clinic\* or unit\* or nurs\* or outpatient\* or ward\* or centre\* or center\*)) AND (surg\* or anaesthe\* or anesthe\* or preoperativ\* or "pre operativ\*" pre-operativ\* or preanaesthe\* or pre-anaesthe\* or pre-anesthe\* or preanesthe\* or "pre anesthe\*")

6 (anaesthe\* or anasthe\* or anesthe\*) N3 outpatient\* N3 clinic\* 30

7 (pre-admiss\* or preadmiss\*) N3 (center\* or centre\*) N3 (evaluat\* or assessment\* or measurement\*)

8 S3 OR S4 OR S5 OR S6 OR S7

9 S3 OR S4 OR S5 OR S6 OR S7 Limiters - Published Date: 19960101-;

Exclude MEDLINE records
